# Supplementary material
Source: PubMed Central journal article supplement (PMC8457362)
Supplement: glycobcoi-glyco-2021-00030_cwab039.pdf [file glycobcoi-glyco-2021-00030_cwab039.pdf]

## Glycobiology CONFLICT OF INTEREST FORM

Title:

Author(s):

Ms number:

**MANUSCRIPT AUTHORS:** *Glycobiology* policy requires that, at the time of submission, each author reveal any financial interests or connections, direct or indirect, or other situations *that might raise the question of bias* in the work reported or the conclusions, implications, or opinions stated - including pertinent commercial or other sources of funding for the individual author(s) or for the associated department(s) or organization(s), personal relationships, or direct academic competition. *If you have been asked to do so by the corresponding author, please complete Part I or II.*

**When considering whether you should declare a conflicting interest or connection please consider the conflict of interest test: Is there any arrangement that would compromise the perception of your impartiality of that of your co-authors if it was to emerge after publication that you had not declared it?**

**PLEASE NOTE:** The *corresponding* author is required to confirm whether any co-author has a conflict of interest to declare. If the corresponding author is unable to confirm this on behalf of each co-author, the co-author in question is required to complete this Conflict of Interest form and either email it to the Editorial Office at [glycobio2@jhmi.edu](mailto:glycobio2@jhmi.edu) or fax it at +1-410-955-3023. It is the corresponding author's responsibility to ensure that all authors adhere to this policy.

If the manuscript is published, this information will be communicated in a statement in the published paper.

**I. There have been no involvements that might raise the question of bias in the work reported or in the conclusions, implications, or opinions stated.**

Printed name:

Signature: \_\_\_\_\_  \_\_\_\_\_ Date:

**OR**

**II. Conflict of interest statement.**

Sample statement: I hold stock\* in [business name], the makers of [product], and am currently conducting research sponsored by this company. I am also a paid consultant for [business name].

\* Please declare stock where this reveals a pertinent conflict of interest. Details (number, value) are *not* required.

**My statement is as follows:**

Printed name:

Signature: \_\_\_\_\_ Date:

email to [glycobio2@jhmi.edu](mailto:glycobio2@jhmi.edu) or

fax to +1-410-955-3023
