# Supplementary material
Source: PubMed Central journal article supplement (PMC8457362)
Supplement: supplementary-data-submitted_final_cwab039.pdf [file supplementary-data-submitted_final_cwab039.pdf]

Worldwide Protein Data Bank

# Supplementary Data: Modernized Uniform Representation of Carbohydrate Molecules in the Protein Data Bank

Chenghua Shao, Zukang Feng, John Westbrook, Ezra Peisach, John Berrisford, Yasuyo Ikegawa, Genji Kurisu, Sameer Velankar, Stephen K. Burley and Jasmine Y. Young

## Table of Contents

|                                                                                                    |    |
|----------------------------------------------------------------------------------------------------|----|
| Supplementary Figure S1: Carbohydrate-containing PDB Entries by Year.....                          | 3  |
| Supplementary Table SI: Cyclic Monosaccharides in the PDB.....                                     | 4  |
| Supplementary Table SII: Glycosylation Types in the PDB.....                                       | 26 |
| Supplementary Table SIII: Blood Group Antigens in BIRD .....                                       | 27 |
| Supplementary Table SIV: Commonly Observed Oligosaccharides in the PDB.....                        | 28 |
| Supplementary Table SV: PDB Examples of Glycan Sequences at the Different Glycosylation Sites..... | 31 |
| Appendix I: Example of Remediated CCD definition of NAG.....                                       | 35 |
| Appendix II: Example of Remediated PDB Entry 1B5F.....                                             | 39 |

## Supplementary Figure S1: Carbohydrate-containing PDB Entries by Year

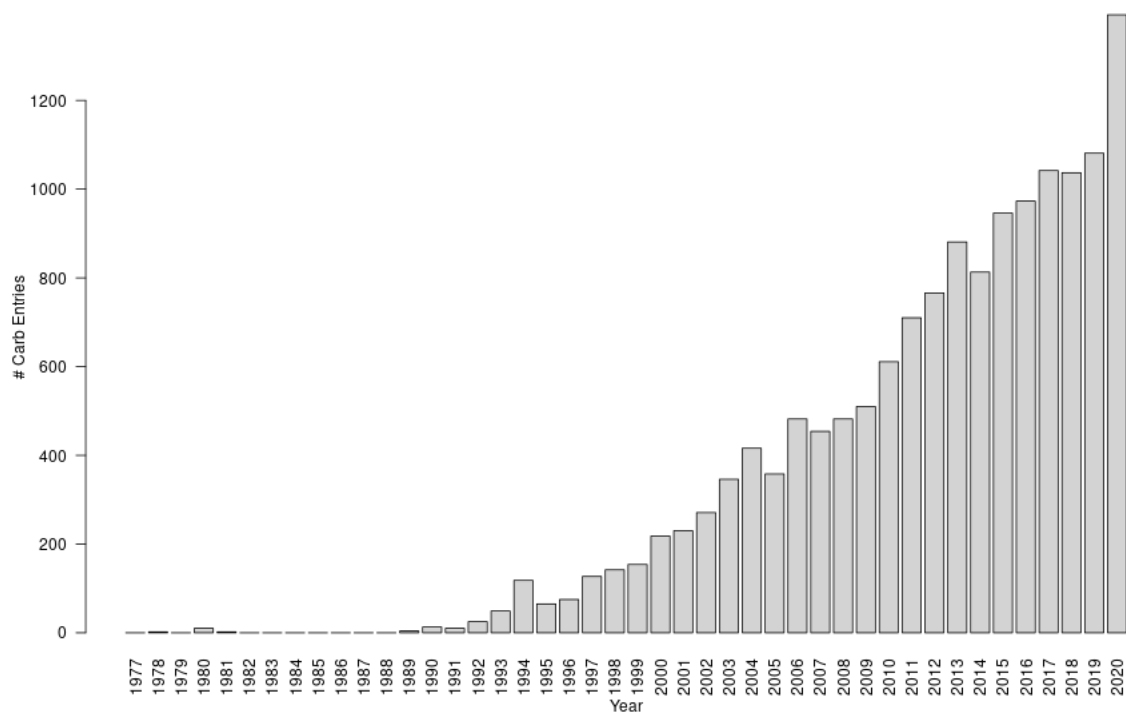

## Supplementary Table S1: Cyclic Monosaccharides in the PDB

| id  | name                                        | basic/<br>modified | parent | SNFG<br>symbol | isomer | ring size | anomer | aldose/<br>ketose |
|-----|---------------------------------------------|--------------------|--------|----------------|--------|-----------|--------|-------------------|
| 289 | D-glycero-alpha-D-manno-heptopyranose       | basic              |        | DDmanHep       | D      | pyranose  | alpha  | aldose            |
| 0MK | beta-L-ribose                               | basic              |        | Rib            | L      | pyranose  | beta   | aldose            |
| 1GN | 2-amino-2-deoxy-beta-D-galactopyranose      | basic              |        | GalN           | D      | pyranose  | beta   | aldose            |
| 1S4 | alpha-muramic acid                          | basic              |        | Mur            | D      | pyranose  | alpha  | aldose            |
| 32O | beta-L-ribofuranose                         | basic              |        | Rib            | L      | furanose  | beta   | aldose            |
| 34V | beta-L-ribulofuranose                       | basic              |        |                | L      | furanose  | beta   | ketose            |
| 3MK | beta-L-altropyranose                        | basic              |        | Alt            | L      | pyranose  | beta   | aldose            |
| 49T | 2-acetamido-2-deoxy-alpha-D-fucopyranose    | basic              |        | FucNAc         | D      | pyranose  | alpha  | aldose            |
| 4GL | alpha-D-gulopyranose                        | basic              |        | Gul            | D      | pyranose  | alpha  | aldose            |
| 4N2 | beta-L-idopyranose                          | basic              |        | Ido            | L      | pyranose  | beta   | aldose            |
| 64K | alpha-D-arabinopyranose                     | basic              |        | Ara            | D      | pyranose  | alpha  | aldose            |
| 66O | alpha-L-6-deoxy-gulopyranose                | basic              |        | 6dGul          | L      | pyranose  | alpha  | aldose            |
| 95Z | 2-amino-2-deoxy-alpha-D-mannopyranose       | basic              |        | ManN           | D      | pyranose  | alpha  | aldose            |
| A2G | 2-acetamido-2-deoxy-alpha-D-galactopyranose | basic              |        | GalNAc         | D      | pyranose  | alpha  | aldose            |
| A5C | alpha-L-talofuranose                        | basic              |        | Tal            | L      | furanose  | alpha  | aldose            |
| ABE | alpha-D-Abequopyranose                      | basic              |        | Abe            | D      | pyranose  | alpha  | aldose            |
| ADA | alpha-D-galactopyranuronic acid             | basic              |        | GalA           | D      | pyranose  | alpha  | aldose            |
| AFD | alpha-D-allopyranose                        | basic              |        | All            | D      | pyranose  | alpha  | aldose            |
| AHR | alpha-L-arabinofuranose                     | basic              |        | Ara            | L      | furanose  | alpha  | aldose            |
| ALL | beta-D-allopyranose                         | basic              |        | All            | D      | pyranose  | beta   | aldose            |
| AMU | N-acetyl-beta-muramic acid                  | basic              |        | MurNAc         | D      | pyranose  | beta   | aldose            |
| ARA | alpha-L-arabinopyranose                     | basic              |        | Ara            | L      | pyranose  | alpha  | aldose            |
| ARB | beta-L-arabinopyranose                      | basic              |        | Ara            | L      | pyranose  | beta   | aldose            |
| BDF | beta-D-fructopyranose                       | basic              |        | Fru            | D      | pyranose  | beta   | ketose            |
| BDP | beta-D-glucopyranuronic acid                | basic              |        | GlcA           | D      | pyranose  | beta   | aldose            |
| BDR | beta-D-ribofuranose                         | basic              |        | Rib            | D      | furanose  | beta   | aldose            |
| BEM | beta-D-mannopyranuronic acid                | basic              |        | ManA           | D      | pyranose  | beta   | aldose            |
| BGC | beta-D-glucopyranose                        | basic              |        | Glc            | D      | pyranose  | beta   | aldose            |
| BM3 | 2-acetamido-2-deoxy-alpha-D-mannopyranose   | basic              |        | ManNAc         | D      | pyranose  | alpha  | aldose            |
| BM7 | 2-acetamido-2-deoxy-beta-D-mannopyranose    | basic              |        | ManNAc         | D      | pyranose  | beta   | aldose            |
| BMA | beta-D-mannopyranose                        | basic              |        | Man            | D      | pyranose  | beta   | aldose            |
| BXX | beta-D-arabinofuranose                      | basic              |        | Ara            | D      | furanose  | beta   | aldose            |
| BXY | alpha-D-arabinofuranose                     | basic              |        | Ara            | D      | furanose  | alpha  | aldose            |
| DDA | beta-D-Olivopyranose                        | basic              |        | Oli            | D      | pyranose  | beta   | aldose            |
| FCA | alpha-D-fucopyranose                        | basic              |        | Fuc            | D      | pyranose  | alpha  | aldose            |
| FCB | beta-D-fucopyranose                         | basic              |        | Fuc            | D      | pyranose  | beta   | aldose            |
| FRU | beta-D-fructofuranose                       | basic              |        | Fru            | D      | furanose  | beta   | ketose            |
| FUB | beta-L-arabinofuranose                      | basic              |        | Ara            | L      | furanose  | beta   | aldose            |
| FUC | alpha-L-fucopyranose                        | basic              |        | Fuc            | L      | pyranose  | alpha  | aldose            |
| FUL | beta-L-fucopyranose                         | basic              |        | Fuc            | L      | pyranose  | beta   | aldose            |

|     |                                                 |       |  |          |   |          |       |        |
|-----|-------------------------------------------------|-------|--|----------|---|----------|-------|--------|
| G6D | alpha-D-quinovopyranose                         | basic |  | Qui      | D | pyranose | alpha | aldose |
| GAL | beta-D-galactopyranose                          | basic |  | Gal      | D | pyranose | beta  | aldose |
| GCS | 2-amino-2-deoxy-beta-D-glucopyranose            | basic |  | GlcN     | D | pyranose | beta  | aldose |
| GCU | alpha-D-glucopyranuronic acid                   | basic |  | GlcA     | D | pyranose | alpha | aldose |
| GIV | beta-L-galactopyranose                          | basic |  | Gal      | L | pyranose | beta  | aldose |
| GL0 | beta-D-gulopyranose                             | basic |  | Gul      | D | pyranose | beta  | aldose |
| GLA | alpha-D-galactopyranose                         | basic |  | Gal      | D | pyranose | alpha | aldose |
| GLC | alpha-D-glucopyranose                           | basic |  | Glc      | D | pyranose | alpha | aldose |
| GMH | L-glycero-alpha-D-manno-heptopyranose           | basic |  | LDmanHep | D | pyranose | alpha | aldose |
| GTK | beta-D-galactofuranuronic acid                  | basic |  | GalA     | D | furanose | beta  | aldose |
| GTR | beta-D-galactopyranuronic acid                  | basic |  | GalA     | D | pyranose | beta  | aldose |
| GUP | alpha-L-gulopyranose                            | basic |  | Gul      | L | pyranose | alpha | aldose |
| GXL | alpha-L-galactopyranose                         | basic |  | Gal      | L | pyranose | alpha | aldose |
| GYE | beta-D-fucofuranose                             | basic |  | Fuc      | D | furanose | beta  | aldose |
| GZL | beta-D-galactofuranose                          | basic |  | Gal      | D | furanose | beta  | aldose |
| HSQ | 2-acetyl-amino-2-deoxy-alpha-L-idopyranose      | basic |  | IdoNAc   | L | pyranose | alpha | aldose |
| HSY | alpha-L-xylopyranose                            | basic |  | Xyl      | L | pyranose | alpha | aldose |
| IDR | alpha-L-idopyranuronic acid                     | basic |  | IdoA     | L | pyranose | alpha | aldose |
| KDM | deamino-alpha-neuraminic acid                   | basic |  | Kdn      | D | pyranose | alpha | ketose |
| KDN | deamino-beta-neuraminic acid                    | basic |  | Kdn      | D | pyranose | beta  | ketose |
| KDO | 3-deoxy-alpha-D-manno-oct-2-ulopyranosonic acid | basic |  | Kdo      | D | pyranose | alpha | ketose |
| LDY | alpha-D-lyxopyranose                            | basic |  | Lyx      | D | pyranose | alpha | aldose |
| LFR | beta-L-fructofuranose                           | basic |  | Fru      | L | furanose | beta  | ketose |
| LGU | alpha-L-gulopyranuronic acid                    | basic |  | GulA     | L | pyranose | alpha | aldose |
| LXB | 2-acetamido-2-deoxy-beta-D-gulopyranose         | basic |  | GulNAc   | D | pyranose | beta  | aldose |
| LXC | beta-L-xylopyranose                             | basic |  | Xyl      | L | pyranose | beta  | aldose |
| LXZ | 2-acetamido-2-deoxy-alpha-D-idopyranose         | basic |  | IdoNAc   | D | pyranose | alpha | aldose |
| MAN | alpha-D-mannopyranose                           | basic |  | Man      | D | pyranose | alpha | aldose |
| MAV | alpha-D-mannopyranuronic acid                   | basic |  | ManA     | D | pyranose | alpha | aldose |
| MUB | N-acetyl-alpha-muramic acid                     | basic |  | MurNAc   | D | pyranose | alpha | aldose |
| MUR | beta-muramic acid                               | basic |  | Mur      | D | pyranose | beta  | aldose |
| NAA | 2-acetamido-2-deoxy-beta-D-allopyranose         | basic |  | AlINAc   | D | pyranose | beta  | aldose |
| NAG | 2-acetamido-2-deoxy-beta-D-glucopyranose        | basic |  | GlcNAc   | D | pyranose | beta  | aldose |
| NDG | 2-acetamido-2-deoxy-alpha-D-glucopyranose       | basic |  | GlcNAc   | D | pyranose | alpha | aldose |
| NGA | 2-acetamido-2-deoxy-beta-D-galactopyranose      | basic |  | GalNAc   | D | pyranose | beta  | aldose |
| NGC | N-glycolyl-alpha-neuraminic acid                | basic |  | Neu5Gc   | D | pyranose | alpha | ketose |
| NGE | N-glycolyl-beta-neuraminic acid                 | basic |  | Neu5Gc   | D | pyranose | beta  | ketose |
| NGZ | 2-acetamido-2-deoxy-alpha-L-glucopyranose       | basic |  | GlcNAc   | L | pyranose | alpha | aldose |
| PA1 | 2-amino-2-deoxy-alpha-D-glucopyranose           | basic |  | GlcN     | D | pyranose | alpha | aldose |
| PSV | alpha-D-psicofuranose                           | basic |  | Psi      | D | furanose | alpha | ketose |
| PZU | alpha-D-Paratopyranose                          | basic |  | Par      | D | pyranose | alpha | aldose |
| RAE | alpha-L-Olivopyranose                           | basic |  | Oli      | L | pyranose | alpha | aldose |
| RAM | alpha-L-rhamnopyranose                          | basic |  | Rha      | L | pyranose | alpha | aldose |

|         |                                             |          |     |        |   |          |       |        |
|---------|---------------------------------------------|----------|-----|--------|---|----------|-------|--------|
| RIB     | alpha-D-ribofuranose                        | basic    |     | Rib    | D | furanose | alpha | aldose |
| RIP     | beta-D-ribopyranose                         | basic    |     | Rib    | D | pyranose | beta  | aldose |
| RM4     | beta-L-rhamnopyranose                       | basic    |     | Rha    | L | pyranose | beta  | aldose |
| RUU     | alpha-L-ribulofuranose                      | basic    |     |        | L | furanose | alpha | ketose |
| SDY     | beta-D-talopyranose                         | basic    |     | Tal    | D | pyranose | beta  | aldose |
| SEJ     | beta-D-arabinopyranose                      | basic    |     | Ara    | D | pyranose | beta  | aldose |
| SF6     | alpha-L-psicofuranose                       | basic    |     | Psi    | L | furanose | alpha | ketose |
| SF9     | beta-L-psicofuranose                        | basic    |     | Psi    | L | furanose | beta  | ketose |
| SHD     | alpha-D-altropyranose                       | basic    |     | Alt    | D | pyranose | alpha | aldose |
| SIA     | N-acetyl-alpha-neuraminic acid              | basic    |     | Neu5Ac | D | pyranose | alpha | ketose |
| SLB     | N-acetyl-beta-neuraminic acid               | basic    |     | Neu5Ac | D | pyranose | beta  | ketose |
| SOE     | alpha-L-sorbopyranose                       | basic    |     | Sor    | L | pyranose | alpha | ketose |
| T6T     | alpha-D-tagatopyranose                      | basic    |     | Tag    | D | pyranose | alpha | ketose |
| TTV     | beta-D-psicofuranose                        | basic    |     | Psi    | D | furanose | beta  | ketose |
| TYV     | alpha-D-Tyvelopyranose                      | basic    |     | Tyv    | D | pyranose | alpha | aldose |
| UEA     | beta-D-sorbofuranose                        | basic    |     | Sor    | D | furanose | beta  | ketose |
| WO<br>O | beta-L-allopyranose                         | basic    |     | All    | L | pyranose | beta  | aldose |
| X0X     | beta-D-talopyranuronic acid                 | basic    |     | TalA   | D | pyranose | beta  | aldose |
| X1X     | alpha-D-talopyranuronic acid                | basic    |     | TalA   | D | pyranose | alpha | aldose |
| X6X     | 2-amino-2-deoxy-alpha-D-galactopyranose     | basic    |     | GalN   | D | pyranose | alpha | aldose |
| XLF     | beta-D-xylulofuranose                       | basic    |     |        | D | furanose | beta  | ketose |
| XXM     | 3-C-(hydroxymethyl)-alpha-D-erythrofuranose | basic    |     | Api    | D | furanose | alpha | aldose |
| XXR     | alpha-D-rhamnopyranose                      | basic    |     | Rha    | D | pyranose | alpha | aldose |
| XYP     | beta-D-xylopyranose                         | basic    |     | Xyl    | D | pyranose | beta  | aldose |
| XYS     | alpha-D-xylopyranose                        | basic    |     | Xyl    | D | pyranose | alpha | aldose |
| XYZ     | beta-D-xylofuranose                         | basic    |     | Xyl    | D | furanose | beta  | aldose |
| YYK     | beta-D-quinovopyranose                      | basic    |     | Qui    | D | pyranose | beta  | aldose |
| YYM     | alpha-D-ribopyranose                        | basic    |     | Rib    | D | pyranose | alpha | aldose |
| YYQ     | 2-acetamido-2-deoxy-alpha-L-galactopyranose | basic    |     | GalNAc | L | pyranose | alpha | aldose |
| Z0F     | alpha-L-idopyranose                         | basic    |     | Ido    | L | pyranose | alpha | aldose |
| Z2D     | alpha-L-allopyranose                        | basic    |     | All    | L | pyranose | alpha | aldose |
| Z3U     | beta-D-Digitoxopyranose                     | basic    |     | Dig    | D | pyranose | beta  | aldose |
| Z4W     | beta-D-lyxopyranose                         | basic    |     | Lyx    | D | pyranose | beta  | aldose |
| Z5J     | beta-L-Olivopyranose                        | basic    |     | Oli    | L | pyranose | beta  | aldose |
| Z6H     | alpha-L-altropyranose                       | basic    |     | Alt    | L | pyranose | alpha | aldose |
| Z6J     | alpha-L-ribofuranose                        | basic    |     | Rib    | L | furanose | alpha | aldose |
| Z8H     | beta-L-gulopyranose                         | basic    |     | Gul    | L | pyranose | beta  | aldose |
| Z8T     | beta-L-glucopyranose                        | basic    |     | Glc    | L | pyranose | beta  | aldose |
| Z9N     | alpha-D-fructofuranose                      | basic    |     | Fru    | D | furanose | alpha | ketose |
| Z9W     | 2-acetamido-2-deoxy-beta-D-quinovopyranose  | basic    |     | QuiNAc | D | pyranose | beta  | aldose |
| ZCD     | alpha-D-idopyranose                         | basic    |     | Ido    | D | pyranose | alpha | aldose |
| ZEE     | beta-L-talopyranose                         | basic    |     | Tal    | L | pyranose | beta  | aldose |
| 145     | 2-nitrophenyl beta-D-galactopyranoside      | modified | GAL |        | D | pyranose | beta  | aldose |

|     |                                                                                                                                      |          |     |  |   |              |       |        |
|-----|--------------------------------------------------------------------------------------------------------------------------------------|----------|-----|--|---|--------------|-------|--------|
| 147 | 4-nitrophenyl beta-D-galactopyranoside                                                                                               | modified | GAL |  | D | pyranose     | beta  | aldose |
| 149 | D-galactonolactone                                                                                                                   | modified |     |  | D | pyranose     |       | aldose |
| 291 | prop-2-en-1-yl 7-O-carbamoyl-L-glycero-alpha-D-manno-heptopyranoside                                                                 | modified | GMH |  | D | pyranose     | alpha | aldose |
| 293 | 2-deoxy-beta-L-galacto-heptopyranose                                                                                                 | modified |     |  | D | pyranose     | alpha | aldose |
| 445 | N-[oxo(phenylamino)acetyl]-beta-D-glucopyranosylamine                                                                                | modified |     |  | D | pyranose     | beta  | aldose |
| 475 | N-[oxo(pyridin-2-ylamino)acetyl]-beta-D-glucopyranosylamine                                                                          | modified |     |  | D | pyranose     | beta  | aldose |
| 491 | 2-acetamido-3-O-[(1R)-1-carboxyethyl]-2-deoxy-1-O-phosphono-alpha-D-glucopyranose                                                    | modified | NDG |  | D | pyranose     | alpha | aldose |
| 510 | methyl (2S,4R)-1-[(2S,3R,4R,5S,6S)-6-(hydroxymethyl)-3,4,5-tris(oxidanyl)oxan-2-yl]sulfonyl-4-sulfamoyloxy-pyrrolidine-2-carboxylate | modified |     |  | L | pyranose     | alpha | aldose |
| 604 | 2-[(3-bromobenzene-1-carbonyl)amino]-6-[[4-carboxy-5-methylfuran-2-yl]sulfonyl]amino}-2,6-dideoxy-alpha-D-glucopyranose              | modified |     |  | D | pyranose     | alpha | aldose |
| 05L | heptyl 1-seleno-beta-D-glucopyranoside                                                                                               | modified |     |  | D | pyranose     | beta  | aldose |
| 07E | (3S)-3-hydroxybutyl beta-D-xylopyranoside                                                                                            | modified | XYP |  | D | pyranose     | beta  | aldose |
| 0HX | pentan-3-yl 2-acetamido-2,4-dideoxy-alpha-L-threo-hex-4-enopyranosiduronic acid                                                      | modified |     |  | L | dihydrofuran | alpha | aldose |
| 0LP | 5-acetamido-2,6-anhydro-3,5-dideoxy-3-[(2E)-3-phenylprop-2-en-1-yl]-D-glycero-L-altro-non-2-enonic acid                              | modified |     |  | L | dihydropyran |       | ketose |
| 0NZ | 2-deoxy-6-O-phosphono-beta-D-glucopyranose                                                                                           | modified |     |  | D | pyranose     | beta  | aldose |
| 0WK | 1,5-anhydro-6-O-phosphono-D-glucitol                                                                                                 | modified |     |  | D | pyranose     |       | aldose |
| 0XY | 5-fluoro-N-acetyl-alpha-D-glucosamine                                                                                                | modified |     |  | D | pyranose     | alpha | aldose |
| 0YT | 2-acetamido-2-deoxy-5-thio-beta-D-glucopyranose                                                                                      | modified |     |  | D | thiopyranose | beta  | aldose |
| 12E | N-[(2E)-2-(pyridin-4-ylmethylidene)hydrazino]carbonothioyl]-beta-D-glucopyranosylamine                                               | modified |     |  | D | pyranose     | beta  | aldose |
| 14T | 3,4-difluorophenyl 2-deoxy-2-[(difluoroacetyl)amino]-beta-D-glucopyranoside                                                          | modified | NAG |  | D | pyranose     | beta  | aldose |
| 15L | D-galactaro-1,5-lactone                                                                                                              | modified |     |  | D | pyranose     |       | aldose |
| 16F | N-[(2Z)-2-[(3-hydroxyphenyl)methylidene]hydrazino]carbonothioyl]-beta-D-glucopyranosylamine                                          | modified |     |  | D | pyranose     | beta  | aldose |
| 16G | 2-acetamido-2-deoxy-6-O-phosphono-alpha-D-glucopyranose                                                                              | modified | NDG |  | D | pyranose     | alpha | aldose |
| 16O | N-[(2E)-2-[(4-bromophenyl)methylidene]hydrazino]carbonothioyl]-beta-D-glucopyranosylamine                                            | modified |     |  | D | pyranose     | beta  | aldose |
| 17T | N-[(2E)-2-[(4-chlorophenyl)methylidene]hydrazino]carbonothioyl]-beta-D-glucopyranosylamine                                           | modified |     |  | D | pyranose     | beta  | aldose |
| 18D | 3,5-dideoxy-5-(propanoylamino)-D-glycero-alpha-D-galactonon-2-ulopyranosonic acid                                                    | modified | SIA |  | D | pyranose     | alpha | ketose |
| 18O | N-[(2E)-2-[(4-nitrophenyl)methylidene]hydrazino]carbonothioyl]-beta-D-glucopyranosylamine                                            | modified |     |  | D | pyranose     | beta  | aldose |
| 1CF | 2-hydroxyethyl 6-deoxy-beta-L-galactopyranoside                                                                                      | modified | FUL |  | L | pyranose     | beta  | aldose |
| 1GL | 2,6-dideoxy-4-O-methyl-alpha-D-galactopyranose                                                                                       | modified |     |  | D | pyranose     | alpha | aldose |
| 1S3 | (2R,3aR,5R,6S,7S,7aR)-5-(hydroxymethyl)tetrahydro-3aH-[1,3,2]dioxaphospholo[4,5-b]pyran-2,6,7-triol 2-oxide                          | modified | GLC |  | D | pyranose     | alpha | aldose |
| 1SD | (1S)-1,5-anhydro-1-sulfamoyl-D-galactitol                                                                                            | modified |     |  | D | pyranose     | beta  | aldose |
| 1X4 | 2,3-dideoxy-5-O-phosphono-alpha-D-ribofuranose                                                                                       | modified |     |  | D | furanose     | alpha | aldose |
| 20X | N-[(2E)-2-[(4-fluorophenyl)methylidene]hydrazino]carbonothioyl]-beta-D-glucopyranosylamine                                           | modified |     |  | D | pyranose     | beta  | aldose |
| 22O | N-[(2E)-2-[(3-bromophenyl)methylidene]hydrazino]carbonothioyl]-beta-D-glucopyranosylamine                                            | modified |     |  | D | pyranose     | beta  | aldose |

|     |                                                                                                                    |          |     |  |   |              |       |        |
|-----|--------------------------------------------------------------------------------------------------------------------|----------|-----|--|---|--------------|-------|--------|
| 22S | N-(((2E)-2-[(2-chlorophenyl)methylidene]hydrazino)carbonothioyl)-beta-D-glucopyranosylamine                        | modified |     |  | D | pyranose     | beta  | aldose |
| 23V | N-(((2E)-2-[(3-chlorophenyl)methylidene]hydrazino)carbonothioyl)-beta-D-glucopyranosylamine                        | modified |     |  | D | pyranose     | beta  | aldose |
| 24S | N-(((2Z)-2-[(2-nitrophenyl)methylidene]hydrazino)carbonothioyl)-beta-D-glucopyranosylamine                         | modified |     |  | D | pyranose     | beta  | aldose |
| 25E | N-(((2Z)-2-[(4-hydroxyphenyl)methylidene]hydrazino)carbonothioyl)-beta-D-glucopyranosylamine                       | modified |     |  | D | pyranose     | beta  | aldose |
| 26O | N-(((2E)-2-[(2-hydroxyphenyl)methylidene]hydrazino)carbonothioyl)-beta-D-glucopyranosylamine                       | modified |     |  | D | pyranose     | beta  | aldose |
| 27C | 5-O-[(S)-butoxy(hydroxy)phosphoryl]-2-deoxy-2-fluoro-alpha-D-arabinofuranose                                       | modified |     |  | D | furanose     | alpha | aldose |
| 2DG | 2-deoxy-alpha-D-galactopyranose                                                                                    | modified |     |  | D | pyranose     | alpha | aldose |
| 2DR | 2-deoxy-beta-D-erythro-pentofuranose                                                                               | modified |     |  | D | furanose     | beta  | aldose |
| 2F8 | methyl 2-acetamido-2-deoxy-alpha-D-glucopyranoside                                                                 | modified | NDG |  | D | pyranose     | alpha | aldose |
| 2FG | 2-deoxy-2-fluoro-beta-D-galactopyranose                                                                            | modified |     |  | D | pyranose     | beta  | aldose |
| 2GL | 4-O-acetyl-2,6-dideoxy-beta-D-galactopyranose                                                                      | modified |     |  | D | pyranose     | beta  | aldose |
| 2GS | 2-O-methyl-alpha-D-galactopyranose                                                                                 | modified | GLA |  | D | pyranose     | alpha | aldose |
| 2H5 | 3-deoxy-3-fluoro-beta-D-galactopyranose                                                                            | modified |     |  | D | pyranose     | beta  | aldose |
| 2M5 | methyl 7-deoxy-L-glycero-alpha-D-manno-heptopyranoside                                                             | modified | MAN |  | D | pyranose     | alpha | aldose |
| 2M8 | (2R)-3-hydroxy-2-(alpha-D-mannopyranosyloxy)propanoic acid                                                         | modified | MAN |  | D | pyranose     | alpha | aldose |
| 2WP | S-ribosylhomocysteine                                                                                              | modified |     |  | D | furanose     | alpha | aldose |
| 3DO | 3-deoxy-beta-D-glucopyranose                                                                                       | modified |     |  | D | pyranose     | beta  | aldose |
| 3FM | 3-O-carbamoyl-alpha-D-mannopyranose                                                                                | modified | MAN |  | D | pyranose     | alpha | aldose |
| 3HD | 1,5-anhydro-3-O-methyl-D-mannitol                                                                                  | modified |     |  | D | pyranose     |       | aldose |
| 3J3 | (1R)-1,5-anhydro-1-[[4-(sulfamoyloxy)piperidin-1-yl]sulfonyl]-D-galactitol                                         | modified |     |  | D | pyranose     | alpha | aldose |
| 3J4 | (6S)-2,6-anhydro-6-[[[(3R)-3-(sulfamoyloxy)pyrrolidin-1-yl]sulfonyl]-D-glucitol                                    | modified |     |  | L | pyranose     | alpha | aldose |
| 3LJ | 2-amino-2-deoxy-6-O-sulfo-alpha-D-glucopyranose                                                                    | modified |     |  | D | pyranose     | alpha | aldose |
| 3MG | 3-O-methyl-beta-D-glucopyranose                                                                                    | modified | BGC |  | D | pyranose     | beta  | aldose |
| 3R3 | [[[(2R,3R,4S,5R)-3,4-bis(oxidanyl)-5-(phosphonooxymethyl)oxolan-2-yl]oxy-oxidanyl-phosphoryl]amino]phosphonic acid | modified | RIB |  | D | furanose     | alpha | aldose |
| 3S6 | prop-2-en-1-yl beta-D-galactofuranoside                                                                            | modified | GZL |  | D | furanose     | beta  | aldose |
| 3YW | (2S)-2,3-dihydroxypropyl 2-acetamido-2-deoxy-alpha-D-glucopyranoside                                               | modified | NDG |  | D | pyranose     | alpha | aldose |
| 42D | 3,5-dideoxy-5-[(methoxycarbonyl)amino]-D-glycero-alpha-D-galacto-non-2-ulopyranosonic acid                         | modified |     |  | D | pyranose     | alpha | ketose |
| 44S | 2-deoxy-6-O-phosphono-beta-D-lyxo-hexofuranose                                                                     | modified |     |  | D | furanose     | beta  | aldose |
| 46Z | (2R,3R,4S,5S)-4-fluoro-3,5-dihydroxytetrahydrofuran-2-yl 2-phenylethyl hydrogen (S)-phosphate                      | modified |     |  | D | furanose     | alpha | aldose |
| 49A | 4,9-AMINO-2,4-DEOXY-2,3-DEHYDRO-N-ACETYL-NEURAMINIC ACID                                                           | modified |     |  | D | dihydropyran |       | ketose |
| 49S | 2-acetamido-2-deoxy-beta-D-mannopyranuronic acid                                                                   | modified |     |  | D | pyranose     | beta  | aldose |
| 49V | 2-acetamido-2,4-dideoxy-alpha-L-erythro-hex-4-enopyranuronic acid                                                  | modified |     |  | L | dihydropyran | alpha | ketose |
| 4AM | 4-AMINO-2-DEOXY-2,3-DEHYDRO-N-ACETYL-NEURAMINIC ACID                                                               | modified |     |  | D | dihydropyran |       | ketose |
| 4GP | N-(carboxycarbonyl)-beta-D-glucopyranosylamine                                                                     | modified |     |  | D | pyranose     | beta  | aldose |
| 4JA | (2S)-3-[(6-deoxy-beta-D-glucopyranosyl)oxy]-2-hydroxypropyl dihydrogen phosphate                                   | modified | YYK |  | D | pyranose     | beta  | aldose |



|     |                                                                                                                                         |          |     |  |   |              |       |        |
|-----|-----------------------------------------------------------------------------------------------------------------------------------------|----------|-----|--|---|--------------|-------|--------|
| 4NN | N-[(5S,6R)-5-hydroxy-6-(hydroxymethyl)-2-oxo-5,6-dihydro-2H-pyran-3-yl]acetamide                                                        | modified |     |  | D | dihydropyran |       | aldose |
| 4QY | 2-acetamido-2-deoxy-6-O-phosphono-beta-D-glucopyranose                                                                                  | modified | NAG |  | D | pyranose     | beta  | aldose |
| 4R1 | 2-amino-2-deoxy-6-O-phosphono-beta-D-glucopyranose                                                                                      | modified | GCS |  | D | pyranose     | beta  | aldose |
| 4SG | 4-thio-alpha-D-glucopyranose                                                                                                            | modified |     |  | D | pyranose     | alpha | aldose |
| 4UZ | 2-[[[(benzyloxy)carbonyl]amino]-2-deoxy-beta-D-glucopyranose                                                                            | modified | GCS |  | D | pyranose     | beta  | aldose |
| 4V5 | 2-deoxy-2-[[3-(4-hydroxyphenyl)propanoyl]amino]-alpha-D-glucopyranose                                                                   | modified | PA1 |  | D | pyranose     | alpha | aldose |
| 50A | 2-deoxy-2-fluoro-5-O-phosphono-alpha-D-ribofuranose                                                                                     | modified |     |  | D | furanose     | alpha | aldose |
| 51N | 5-O-[(R)-hydroxy(phosphonoxy)phosphoryl]-1-O-phosphono-alpha-D-ribofuranose                                                             | modified | RIB |  | D | furanose     | alpha | aldose |
| 56N | phenyl beta-D-galactopyranoside                                                                                                         | modified | GAL |  | D | pyranose     | beta  | aldose |
| 57S | 4-O-[2-acetamido-2-deoxy-beta-D-glucopyranosyl]-5-O-phosphono-D-ribitol                                                                 | modified | NAG |  | D | pyranose     | beta  | aldose |
| 5DI | alpha-D-threo-hexo-2,5-diulo-2,6-pyranosyl fluoride                                                                                     | modified |     |  |   | pyranose     |       | aldose |
| 5GF | 5-fluoro-beta-D-glucopyranose                                                                                                           | modified | BGC |  | D | pyranose     | beta  | aldose |
| 5KQ | (6R)-5-acetamido-6-[(1S,2S)-3-acetamido-1,2-dihydroxypropyl]-3,5-dideoxy-beta-L-threo-hex-2-ulopyranosonic acid                         | modified |     |  | L | pyranose     | beta  | ketose |
| 5KV | 2-deoxy-6-O-sulfo-2-(sulfoamino)-beta-D-glucopyranose                                                                                   | modified | GCS |  | D | pyranose     | beta  | aldose |
| 5L2 | methyl (2S,4R)-1-[(2S,3R,4R,5S,6S)-6-(acetyloxymethyl)-3,4,5-tris(oxidanyl)oxan-2-yl]sulfonyl-4-sulfamoyloxy-pyrrolidine-2-carb oxylate | modified |     |  | D | pyranose     | beta  | aldose |
| 5L3 | (6R)-5-O-acetyl-2,6-anhydro-6-[[4-(sulfamoyloxy)piperidin-1-yl]sulfonyl]-L-glucitol                                                     | modified |     |  | D | pyranose     | alpha | aldose |
| 5LS | 2,4-di-O-sulfo-alpha-D-glucopyranose                                                                                                    | modified | GLC |  | D | pyranose     | alpha | aldose |
| 5LT | 3,4-di-O-sulfo-alpha-D-glucopyranose                                                                                                    | modified | GLC |  | D | pyranose     | alpha | aldose |
| 5N6 | 9-O-acetyl-5-acetamido-3,5-dideoxy-D-glycero-alpha-D-galacto-non-2-ulopyranosonic acid                                                  | modified | SIA |  | D | pyranose     | alpha | ketose |
| 5QP | (1R,2R,3S,5R,6S)-2,3,5-trihydroxy-6-(hydroxymethyl)cyclohexyl alpha-D-glucopyranoside                                                   | modified | GLC |  | D | pyranose     | alpha | aldose |
| 5TH | [(2S,3R,4S,5S,6R)-6-(hydroxymethyl)-2,4-bis(oxidanyl)-5-oxidanylsulfanyloxy-oxan-3-yl] hydrogen sulfate                                 | modified | GLC |  | D | pyranose     | alpha | aldose |
| 5TJ | [(2R,3R,4R,5R,6S)-2-(hydroxymethyl)-5,6-bis(oxidanyl)-3-oxidanylsulfanyloxy-oxan-4-yl] hydrogen sulfate                                 | modified | GLC |  | D | pyranose     | alpha | aldose |
| 5TK | (2S,3R,4R,5S,6R)-6-(hydroxymethyl)-5-oxidanylsulfanyloxy-oxane-2,3,4-triol                                                              | modified | GLC |  | D | pyranose     | alpha | aldose |
| 5TM | [(2S,3R,4S,5R,6R)-6-(hydroxymethyl)-2,5-bis(oxidanyl)-4-oxidanylsulfanyloxy-oxan-3-yl] hydrogen sulfate                                 | modified | GLC |  | D | pyranose     | alpha | aldose |
| 61J | (6S)-2,6-anhydro-1-deoxy-6-(2-[[[S]-hydroxy(oxido)-lambda~5~-phosphanyl]oxy]ethyl)-D-galactitol                                         | modified |     |  | D | pyranose     |       | ketose |
| 62I | (6R)-1-O-acetyl-2,6-anhydro-6-[[4-(sulfamoyloxy)piperidin-1-yl]sulfonyl]-L-glucitol                                                     | modified |     |  | D | pyranose     | alpha | aldose |
| 6BG | 6-bromo-6-deoxy-beta-D-glucopyranose                                                                                                    | modified |     |  | D | pyranose     | beta  | aldose |
| 6C2 | methyl 2-acetamido-2-deoxy-beta-D-glucopyranosiduronic acid                                                                             | modified |     |  | D | pyranose     | beta  | aldose |
| 6GP | N-[methoxy(oxo)acetyl]-beta-D-glucopyranosylamine                                                                                       | modified |     |  | D | pyranose     | beta  | aldose |
| 6GR | 2-(alpha-L-altropyranosyloxy)benzoic acid                                                                                               | modified | Z6H |  | L | pyranose     | alpha | aldose |
| 6K3 | heptyl 4-deoxy-4-fluoro-alpha-D-mannopyranoside                                                                                         | modified |     |  | D | pyranose     | alpha | aldose |
| 6KH | heptyl 3-fluoro-alpha-D-mannopyranoside                                                                                                 | modified |     |  | D | pyranose     | alpha | aldose |
| 6KL | methyl 4,5-bisacetamido-3,4,5-trideoxy-D-glycero-alpha-D-galacto-non-2-ulopyranosidonic acid                                            | modified |     |  | D | pyranose     | alpha | ketose |
| 6KS | heptyl 2-fluoro-alpha-D-mannopyranoside                                                                                                 | modified |     |  | D | pyranose     | alpha | aldose |
| 6KU | heptyl 4-deoxy-4-deoxy-alpha-D-mannopyranoside                                                                                          | modified |     |  | D | pyranose     | alpha | aldose |
| 6KW | heptyl 3-deoxy-alpha-D-mannopyranoside                                                                                                  | modified |     |  | D | pyranose     | alpha | aldose |
| 6LS | heptyl 2-deoxy-alpha-D-mannopyranoside                                                                                                  | modified |     |  | D | pyranose     | alpha | aldose |

|     |                                                                                                                                           |          |     |  |   |              |       |        |
|-----|-------------------------------------------------------------------------------------------------------------------------------------------|----------|-----|--|---|--------------|-------|--------|
| 6LW | (Z)-L-Arabinonhydroximo-1,4-lactone                                                                                                       | modified |     |  | L | furanose     |       | aldose |
| 6MJ | methyl beta-D-xylopyranoside                                                                                                              | modified | XYP |  | D | pyranose     | beta  | aldose |
| 6MN | 2-amino-2-deoxy-6-O-phosphono-alpha-D-mannopyranose                                                                                       | modified | 95Z |  | D | pyranose     | alpha | aldose |
| 6PY | 5-acetamido-2,6-anhydro-4-carbamimidamido-3,4,5-trideoxy-7-O-[(2-methoxyethyl)carbamoyl]-D-glycero-D-galacto-non-2-enonic acid            | modified |     |  | D | dihydropyran |       | ketose |
| 6PZ | 5,7-bisacetamido-3,5,7,9-tetradeoxy-L-glycero-alpha-L-mannon-2-ulopyranosonic acid                                                        | modified |     |  | D | pyranose     | beta  | ketose |
| 6S2 | methyl 2-acetamido-2-deoxy-6-O-sulfo-beta-D-glucopyranoside                                                                               | modified | NAG |  | D | pyranose     | beta  | aldose |
| 6UD | 5-acetamido-2,6-anhydro-3,5,9-trideoxy-9-triazan-1-yl-D-glycero-D-galacto-non-2-enonic acid                                               | modified |     |  | D | dihydropyran |       | ketose |
| 6Y6 | 2,6-anhydro-3,4,5-trideoxy-4-[4-(methoxymethyl)-1H-1,2,3-triazol-1-yl]-5-[(2-methylpropanoyl)amino]-D-glycero-D-galacto-non-2-enonic acid | modified |     |  | D | dihydropyran |       | ketose |
| 6YR | methyl 1-seleno-2-O-methyl-beta-L-fucopyranoside                                                                                          | modified |     |  | L | pyranose     | beta  | aldose |
| 6ZC | 4-nitrophenyl 2-acetamido-2-deoxy-alpha-D-glucopyranoside                                                                                 | modified | PA1 |  | D | pyranose     | alpha | aldose |
| 73E | (1S)-1,5-anhydro-1-(5-phenyl-4H-1,2,4-triazol-3-yl)-D-glucitol                                                                            | modified |     |  | D | pyranose     |       | aldose |
| 79J | 4-O-acetyl-5-acetamido-3,5-dideoxy-L-glycero-alpha-D-galacto-non-2-ulopyranosonic acid                                                    | modified |     |  | D | pyranose     | alpha | ketose |
| 7CV | 6-deoxy-2,3-di-O-methyl-alpha-L-mannopyranose                                                                                             | modified | RAM |  | L | pyranose     | alpha | aldose |
| 7D1 | 1,5-anhydro-2-deoxy-D-arabino-hexitol                                                                                                     | modified |     |  | D | pyranose     |       | aldose |
| 7GP | N-[ethoxy(oxo)acetyl]-beta-D-glucopyranosylamine                                                                                          | modified |     |  | D | pyranose     | beta  | aldose |
| 7JZ | 2-deoxy-2,2-difluoro-beta-D-lyxo-hexopyranose                                                                                             | modified |     |  | D | pyranose     | beta  | aldose |
| 7K2 | [(3S,4R,5R)-4,5-dihydropiperidin-3-yl]methyl 1-thio-alpha-D-mannopyranoside                                                               | modified |     |  | D | pyranose     | alpha | aldose |
| 7K3 | 1-thio-alpha-D-mannopyranose                                                                                                              | modified |     |  | D | pyranose     | alpha | aldose |
| 7NU | phenyl 6,7-anhydro-D-glycero-beta-D-galacto-heptopyranoside                                                                               | modified | BGC |  | D | pyranose     | beta  | aldose |
| 83Y | 3-O-sulfo-alpha-L-rhamnopyranose                                                                                                          | modified | RAM |  | L | pyranose     | alpha | aldose |
| 89Y | (3R,4R)-3,4-dihydroxy-4-(hydroxymethyl)oxolan-2-one                                                                                       | modified |     |  | D | furanose     |       | aldose |
| 8B9 | 2-acetamido-2,4-dideoxy-alpha-D-xylo-hexopyranose                                                                                         | modified |     |  | D | pyranose     | alpha | aldose |
| 8EX | 2-acetamido-2-deoxy-4,6-di-O-sulfo-beta-D-galactopyranose                                                                                 | modified | NGA |  | D | pyranose     | beta  | aldose |
| 8GA | 5-Se-methyl-5-seleno-alpha-D-ribofuranose                                                                                                 | modified |     |  | D | furanose     | alpha | aldose |
| 8GG | 5-Se-methyl-5-seleno-beta-D-ribofuranose                                                                                                  | modified |     |  | D | furanose     | beta  | aldose |
| 8GP | N-[(cyclopropylamino)(oxo)acetyl]-beta-D-glucopyranosylamine                                                                              | modified |     |  | D | pyranose     | beta  | aldose |
| 8LM | 2,6-anhydro-3,5-dideoxy-5-[(2-methylpropanoyl)amino]-3-(4-phenyl-1H-1,2,3-triazol-1-yl)-D-glycero-D-galacto-non-2-enonic acid             | modified |     |  | D | dihydropyran |       | ketose |
| 8LR | 2-hydroxyethyl alpha-D-mannopyranoside                                                                                                    | modified | MAN |  | D | pyranose     | alpha | aldose |
| 8OQ | alpha-D-aceric acid                                                                                                                       | modified |     |  | D | furanose     | alpha | aldose |
| 8PK | 4-O-[(1R)-1-hydroxyethyl]-2-O-methyl-alpha-L-fucopyranose                                                                                 | modified | FUC |  | L | pyranose     | alpha | aldose |
| 8S0 | L-glucono-1,5-lactone                                                                                                                     | modified |     |  | L | pyranose     |       | aldose |
| 96O | (1-methyl-1H-1,2,3-triazol-4-yl)methyl alpha-D-mannopyranoside                                                                            | modified | MAN |  | D | pyranose     | alpha | aldose |
| 9AM | 9-AMINO-2-DEOXY-2,3-DEHYDRO-N-ACETYL-NEURAMINIC ACID                                                                                      | modified |     |  | D | dihydropyran |       | ketose |
| 9C1 | 2-[[[(2E)-4-chlorobut-2-enoyl]amino]-2-deoxy-beta-D-glucopyranose                                                                         | modified | GCS |  | D | pyranose     | beta  | aldose |
| 9CD | 2-[[[(2E)-but-2-enoyl]amino]-2-deoxy-beta-D-glucopyranose                                                                                 | modified | GCS |  | D | pyranose     | beta  | aldose |
| 9GP | N-(hydroxyacetyl)-beta-D-glucopyranosylamine                                                                                              | modified |     |  | D | pyranose     | beta  | aldose |
| 9KJ | {[(2R,3R,4R,5R)-3-(alpha-D-glucopyranosyloxy)-4-hydroxy-2,5-bis(hydroxymethyl)pyrrolidin-1-yl]methyl}phosphonic acid                      | modified | GLC |  | D | pyranose     | alpha | aldose |

|     |                                                                                                                        |          |     |  |   |          |       |        |
|-----|------------------------------------------------------------------------------------------------------------------------|----------|-----|--|---|----------|-------|--------|
| 9MR | (3R,4R,5R)-3-hydroxy-5-(hydroxymethyl)piperidin-4-yl beta-D-glucopyranoside                                            | modified | BGC |  | D | pyranose | beta  | aldose |
| 9OK | 2-(3,4-dihydroxyphenyl)ethyl beta-D-fructofuranoside                                                                   | modified | FRU |  | D | furanose | beta  | ketose |
| 9PG | 4-nitrophenyl alpha-D-galactopyranoside                                                                                | modified | GLA |  | D | pyranose | alpha | aldose |
| 9QG | methyl 3-O-[(1R)-1-carboxyethyl]-beta-D-galactopyranoside                                                              | modified | GAL |  | D | pyranose | beta  | aldose |
| 9S7 | 5-acetamido-2,6-anhydro-3,5,8-trideoxy-3-fluoro-D-threo-L-galacto-nononic acid                                         | modified |     |  | D | pyranose |       | ketose |
| 9SG | (2R,3R,5R,6R)-5-acetamido-2,3-bis(fluoranyl)-6-[(1R,2R)-1,2,3-tris(oxidanyl)propyl]oxane-2-carboxylic acid             | modified |     |  | D | pyranose |       | ketose |
| 9SJ | 5-acetamido-2,6-anhydro-3,5,7-trideoxy-3-fluoro-D-threo-L-galacto-nononic acid                                         | modified |     |  | D | pyranose |       | ketose |
| 9SM | (2R,3R,4R,5R,6S)-5-acetamido-6-[(2S)-2,3-bis(oxidanyl)propyl]-2,3-bis(fluoranyl)-4-oxidanyl-oxane-2-carboxylic acid    | modified |     |  | D | pyranose |       | ketose |
| 9SP | (2R,3R,4R,5R,6R)-5-acetamido-6-[(1R)-1,3-bis(oxidanyl)propyl]-2,3-bis(fluoranyl)-4-oxidanyl-oxane-2-carboxylic acid    | modified |     |  | D | pyranose |       | ketose |
| 9T1 | 5-acetamido-2,6-anhydro-3,5,9-trideoxy-3-fluoro-D-erythro-L-glucos-4-ulosonic acid                                     | modified |     |  | L | pyranose |       | ketose |
| 9T7 | (2R,3R,4R,5R,6R)-5-acetamido-6-[(1R,2R)-1,2-bis(oxidanyl)propyl]-2,3-bis(fluoranyl)-4-oxidanyl-oxane-2-carboxylic acid | modified |     |  | D | pyranose |       | ketose |
| 9VP | 5-acetamido-2,6-anhydro-3,4,5-trideoxy-3-fluoro-D-erythro-L-glucos-4-ulosonic acid                                     | modified |     |  | D | pyranose |       | ketose |
| 9WJ | 4-acetamido-4,6-dideoxy-beta-D-mannopyranose                                                                           | modified |     |  | D | pyranose | beta  | aldose |
| 9WN | (2R)-2-(alpha-D-glucopyranosyloxy)-3-hydroxypropanoic acid                                                             | modified | GLC |  | D | pyranose | alpha | aldose |
| 9WZ | 2-hydroxy-4-(2-hydroxyethyl)phenyl beta-D-fructofuranoside                                                             | modified | FRU |  | D | furanose | beta  | ketose |
| 9YW | (alpha-D-glucopyranosyloxy)acetic acid                                                                                 | modified | GLC |  | D | pyranose | alpha | aldose |
| A0K | 1,3-dihydroxypropan-2-yl alpha-D-glucopyranoside                                                                       | modified | GLC |  | D | pyranose | alpha | aldose |
| A1Q | methyl L-glycero-alpha-D-manno-heptopyranoside                                                                         | modified | GMH |  | D | pyranose | alpha | aldose |
| A6P | 6-O-phosphono-alpha-D-allopyranose                                                                                     | modified | AFD |  | D | pyranose | alpha | aldose |
| AAL | 3,6-anhydro-alpha-L-galactopyranose                                                                                    | modified |     |  | L | pyranose | alpha | aldose |
| ABF | 5-O-phosphono-beta-D-arabinofuranose                                                                                   | modified | BXX |  | D | furanose | beta  | aldose |
| ABL | (2R,3R,4R,5R)-4,5-dihydroxy-2-(hydroxymethyl)-6-oxopiperidin-3-yl beta-D-glucopyranoside                               | modified | BGC |  | D | pyranose | beta  | aldose |
| AC1 | 4,6-dideoxy-4-[[[(1S,4R,5S,6S)-4,5,6-trihydroxy-3-(hydroxymethyl)cyclohex-2-en-1-yl]amino]-alpha-D-glucopyranose       | modified |     |  | D | pyranose | alpha | aldose |
| AF1 | 4,6-dideoxy-4-[[[(1S,4S,5S,6S)-4,5,6-trihydroxy-3-(hydroxymethyl)cyclohex-2-en-1-yl]amino]-beta-D-glucopyranose        | modified |     |  | D | pyranose | beta  | aldose |
| AFO | octyl alpha-D-arabinofuranoside                                                                                        | modified | BXY |  | D | furanose | alpha | aldose |
| AFP | 1,6-di-O-phosphono-alpha-D-fructofuranose                                                                              | modified | Z9N |  | D | furanose | alpha | ketose |
| AFR | alpha-D-threo-hexo-2,5-diulo-5,1-pyranosyl fluoride                                                                    | modified |     |  |   | pyranose |       | aldose |
| AGL | 4-amino-4,6-dideoxy-alpha-D-glucopyranose                                                                              | modified |     |  | D | pyranose | alpha | aldose |
| AH2 | 1-deoxy-alpha-D-mannopyranose                                                                                          | modified |     |  | D | pyranose |       | aldose |
| AH8 | (2R,3R,4R,5S)-2-azido-5-(hydroxymethyl)oxolane-3,4-diol                                                                | modified |     |  | L | furanose | alpha | aldose |
| AHG | 2,5-anhydro-1,6-di-O-phosphono-D-glucitol                                                                              | modified |     |  | D | furanose |       |        |
| AHM | 2,5-anhydro-1,6-di-O-phosphono-D-mannitol                                                                              | modified |     |  | D | furanose |       |        |
| AIG | hexyl 3-amino-3-deoxy-beta-D-galactopyranoside                                                                         | modified |     |  | D | pyranose | beta  | aldose |
| ALX | 2-O-phosphono-alpha-D-glucopyranose                                                                                    | modified | GLC |  | D | pyranose | alpha | aldose |
| AMG | methyl alpha-D-galactopyranoside                                                                                       | modified | GLA |  | D | pyranose | alpha | aldose |
| AMN | methyl 5-acetamido-9-amino-3,5,9-trideoxy-D-glycero-alpha-D-galacto-non-2-ulopyranosidonic acid                        | modified |     |  | D | pyranose | alpha | ketose |
| AMV | methyl 2-acetamido-3-O-[(1R)-1-carboxyethyl]-2-deoxy-beta-D-glucopyranoside                                            | modified | NAG |  | D | pyranose | beta  | aldose |

|     |                                                                                                                   |          |     |  |   |              |       |        |
|-----|-------------------------------------------------------------------------------------------------------------------|----------|-----|--|---|--------------|-------|--------|
| ANA | methyl 4-O-acetyl-5-acetamido-3,5-dideoxy-D-glycero-alpha-D-galacto-non-2-ulopyranosidonic acid                   | modified | SIA |  | D | pyranose     | alpha | ketose |
| AOG | octyl 3-amino-3-deoxy-beta-D-galactopyranoside                                                                    | modified |     |  | D | pyranose     | beta  | aldose |
| AQA | 4-deoxy-beta-L-threo-hex-4-enopyranuronic acid                                                                    | modified |     |  | L | dihydropyran | beta  | aldose |
| ARI | (2R,3R,6R)-6-hydroxy-2-methyltetrahydro-2H-pyran-3-yl acetate                                                     | modified |     |  | D | pyranose     | beta  | aldose |
| ARW | methyl beta-D-arabinopyranoside                                                                                   | modified | SEJ |  | D | pyranose     | beta  | aldose |
| ASC | ASCORBIC ACID                                                                                                     | modified |     |  | L | dihydrofuran |       | aldose |
| ASG | 2-acetamido-2-deoxy-4-O-sulfo-beta-D-galactopyranose                                                              | modified | NGA |  | D | pyranose     | beta  | aldose |
| ASO | 1,5-anhydro-D-glucitol                                                                                            | modified |     |  | D | pyranose     |       | aldose |
| AXP | (1S)-4-acetamido-1,5-anhydro-2,4-dideoxy-1-phosphono-D-glycero-D-galacto-octitol                                  | modified |     |  | D | pyranose     |       | ketose |
| AXR | methyl alpha-D-arabinofuranoside                                                                                  | modified | BXY |  | D | furanose     | alpha | aldose |
| AY9 | Ascopyrone M                                                                                                      | modified |     |  | D | dihydropyran |       | aldose |
| AZC | N-(acetylcarbamoyle)-beta-D-glucopyranosylamine                                                                   | modified |     |  | D | pyranose     | beta  | aldose |
| B0D | (2R,3S,4R,5R,6R)-2,6-difluoro-2-(hydroxymethyl)tetrahydro-2H-pyran-3,4,5-triol                                    | modified |     |  | L | pyranose     |       | aldose |
| B16 | 1,6-di-O-phosphono-beta-D-glucopyranose                                                                           | modified | BGC |  | D | pyranose     | beta  | aldose |
| B1H | (1S)-1,5-anhydro-1-(3-[4-[hydroxy(oxo)azaniumyl]phenyl]-1H-1,2,4-triazol-5-yl)-D-glucitol                         | modified |     |  | D | pyranose     | beta  | aldose |
| B1N | (1S)-1,5-anhydro-1-[3-(4-hydroxyphenyl)-1H-1,2,4-triazol-5-yl]-D-glucitol                                         | modified |     |  | D | pyranose     |       | aldose |
| B6D | 2,4-bisacetamido-2,4,6-trideoxy-beta-D-glucopyranose                                                              | modified |     |  | D | pyranose     | beta  | aldose |
| B7G | heptyl beta-D-glucopyranoside                                                                                     | modified | BGC |  | D | pyranose     | beta  | aldose |
| B8D | 4-O-methyl-alpha-D-glucopyranose                                                                                  | modified | GLC |  | D | pyranose     | alpha | aldose |
| B9D | 5-fluoro-alpha-L-idopyranose                                                                                      | modified |     |  | L | pyranose     | alpha | aldose |
| BBK | 2-acetamido-2-deoxy-5-thio-alpha-D-galactopyranose                                                                | modified |     |  | D | thiopyranose | alpha | aldose |
| BBV | benzyl 2-acetamido-2-deoxy-alpha-D-glucopyranoside                                                                | modified | NDG |  | D | pyranose     | alpha | aldose |
| BDG | 2,6-diamino-2,6-dideoxy-alpha-D-glucopyranose                                                                     | modified |     |  | D | pyranose     | alpha | aldose |
| BFN | 5-acetamido-9-(benzoylamino)-3,5,9-trideoxy-3-fluoro-D-erythro-alpha-L-manno-non-2-ulopyranosonic acid            | modified |     |  | D | pyranose     | beta  | ketose |
| BG6 | 6-O-phosphono-beta-D-glucopyranose                                                                                | modified | BGC |  | D | pyranose     | beta  | aldose |
| BG8 | 2-(benzoylamino)-2-deoxy-beta-D-glucopyranose                                                                     | modified | GCS |  | D | pyranose     | beta  | aldose |
| BGL | 2-O-octyl-beta-D-glucopyranose                                                                                    | modified | BGC |  | D | pyranose     | beta  | aldose |
| BGN | 2-(butanoylamino)-2-deoxy-beta-D-glucopyranose                                                                    | modified | GCS |  | D | pyranose     | beta  | aldose |
| BGP | 6-O-phosphono-beta-D-galactopyranose                                                                              | modified | GAL |  | D | pyranose     | beta  | aldose |
| BGS | (1S)-1,5-anhydro-1-(ethylsulfonyl)-D-glucitol                                                                     | modified |     |  | D | pyranose     | beta  | aldose |
| BHG | hexyl beta-D-galactopyranoside                                                                                    | modified | GAL |  | D | pyranose     | beta  | aldose |
| BMX | 2-acetamido-2-deoxy-6-O-phosphono-alpha-D-mannopyranose                                                           | modified | BM3 |  | D | pyranose     | alpha | aldose |
| BND | methyl 5-acetamido-3,5,9-trideoxy-9-[(phenylcarbonyl)amino]-D-glycero-alpha-D-galacto-non-2-ulopyranosidonic acid | modified |     |  | D | pyranose     | alpha | ketose |
| BNG | nonyl beta-D-glucopyranoside                                                                                      | modified | BGC |  | D | pyranose     | beta  | aldose |
| BNX | 2-O-phosphono-beta-D-glucopyranose                                                                                | modified | BGC |  | D | pyranose     | beta  | aldose |
| BO1 | N-(4-sulfamoylphenyl)-beta-D-glucopyranosylamine                                                                  | modified |     |  | D | pyranose     | beta  | aldose |
| BOG | octyl beta-D-glucopyranoside                                                                                      | modified | BGC |  | D | pyranose     | beta  | aldose |
| BQY | 2-methoxyphenyl beta-D-galactopyranoside                                                                          | modified | GAL |  | D | pyranose     | beta  | aldose |
| BS7 | 8-hydroxyquinoline beta-galactopyranoside                                                                         | modified | GAL |  | D | pyranose     | beta  | aldose |
| BTG | ortho-biphenyl-2'-carboxyl N-acetyl-beta-galactosaminoside                                                        | modified | NGA |  | D | pyranose     | beta  | aldose |

|     |                                                                                                                  |          |     |   |              |       |        |
|-----|------------------------------------------------------------------------------------------------------------------|----------|-----|---|--------------|-------|--------|
| BWG | N-[5-[(1R)-1-hydroxyethyl]-1,3-thiazol-2-yl]-alpha-D-mannopyranosylamine                                         | modified |     | D | pyranose     | alpha | aldose |
| BXF | 2-deoxy-2-fluoro-beta-D-xylopyranose                                                                             | modified |     | D | pyranose     | beta  | aldose |
| BZD | N-[(phenylcarbonyl)carbamoyl]-beta-D-glucopyranosylamine                                                         | modified |     | D | pyranose     | beta  | aldose |
| C3B | 4-amino-1-beta-D-glucopyranosylpyrimidin-2(1H)-one                                                               | modified |     | D | pyranose     | beta  | aldose |
| C3G | 4-nitrophenyl beta-D-glucopyranosiduronic acid                                                                   | modified | BDP | D | pyranose     | beta  | aldose |
| C3X | (2R)-oxiran-2-ylmethyl beta-D-xylopyranoside                                                                     | modified | XYP | D | pyranose     | beta  | aldose |
| C4B | 1-beta-D-glucopyranosyl-1,3,5-triazinane-2,4,6-trione                                                            | modified |     | D | pyranose     | beta  | aldose |
| C4W | 1-azido-beta-N-acetyl-D-glucosamine                                                                              | modified |     | D | pyranose     | beta  | aldose |
| C5X | 3-[(2R)-oxiran-2-yl]propyl beta-D-xylopyranoside                                                                 | modified | XYP | D | pyranose     | beta  | aldose |
| CBF | (2R,3R,4S,5S,6R)-2,3,4,5-tetrahydroxy-6-(hydroxymethyl)oxane-2-carboxamide                                       | modified |     | D | pyranose     | alpha | ketose |
| CDR | (2R,5S,6R)-6-methyltetrahydro-2H-pyran-2,5-diol                                                                  | modified |     | D | pyranose     | beta  | aldose |
| CEG | 4,6-O-[(1S)-1-carboxyethylidene]-beta-D-glucopyranose                                                            | modified | BGC | D | pyranose     | beta  | aldose |
| CEZ | 4-O-beta-D-glucopyranosyl-D-gluconic acid                                                                        | modified | BGC | D | pyranose     | beta  | aldose |
| CGF | C-(1-AZIDO-ALPHA-D-GLUCOPYRANOSYL) FORMAMIDE                                                                     | modified |     | D | pyranose     |       | aldose |
| CJB | 1-beta-D-glucopyranosylpyrimidine-2,4(1H,3H)-dione                                                               | modified |     | D | pyranose     | beta  | aldose |
| CKB | 1-beta-D-glucopyranosyl-5-methylpyrimidine-2,4(1H,3H)-dione                                                      | modified |     | D | pyranose     | beta  | aldose |
| CKP | 6-O-phosphono-beta-D-psicofuranosonic acid                                                                       | modified | PSV | D | furanose     | alpha | ketose |
| CNP | 2-propenyl-N-acetyl-neuraminic acid                                                                              | modified |     | D | pyranose     |       | ketose |
| CR1 | N-(methoxycarbonyl)-beta-D-glucopyranosylamine                                                                   | modified |     | D | pyranose     | beta  | aldose |
| CR6 | 1-DEOXY-1-ACETYLAMINO-BETA-D-GLUCO-2-HEPTULOPYRANOSONAMIDE                                                       | modified |     | D | pyranose     | beta  | aldose |
| CRA | 1-DEOXY-1-METHOXYCARBAMIDO-BETA-D-GLUCO-2-HEPTULOPYRANOSONAMIDE                                                  | modified |     | D | pyranose     | beta  | aldose |
| D1M | 5-ethynyl-1-(beta-D-glucopyranosyl)pyrimidine-2,4(1H,3H)-dione                                                   | modified |     | D | pyranose     | beta  | aldose |
| D5E | paromamine                                                                                                       | modified | PA1 | D | pyranose     | alpha | aldose |
| D6G | 2-deoxy-6-O-phosphono-alpha-D-glucopyranose                                                                      | modified |     | D | pyranose     | alpha | aldose |
| DAF | 4,6-dideoxy-4-[[[(1S,5R,6S)-3-formyl-5,6-dihydroxy-4-oxocyclohex-2-en-1-yl]amino]-alpha-D-xylo-hex-5-enopyranose | modified |     | D | pyranose     | alpha | aldose |
| DAG | 4-amino-4,6-dideoxy-beta-D-glucopyranose                                                                         | modified |     | D | pyranose     | beta  | aldose |
| DAN | 2-DEOXY-2,3-DEHYDRO-N-ACETYL-NEURAMINIC ACID                                                                     | modified |     | D | dihydropyran |       | ketose |
| DDL | 2,6-dideoxy-beta-D-galactopyranose                                                                               | modified |     | D | pyranose     | beta  | aldose |
| DEG | butyl alpha-D-mannopyranoside                                                                                    | modified | MAN | D | pyranose     | alpha | aldose |
| DFR | 3-deoxy-3-methyl-beta-D-fructofuranose                                                                           | modified |     | D | furanose     | beta  | ketose |
| DFX | 1,5-anhydro-2-deoxy-2-fluoro-D-xylitol                                                                           | modified |     | D | pyranose     |       | aldose |
| DGO | D-glucal                                                                                                         | modified |     | D | dihydropyran |       | aldose |
| DGS | 3,6-anhydro-2-O-sulfo-alpha-D-galactopyranose                                                                    | modified |     | D | pyranose     | alpha | aldose |
| DJB | 3-O-acetyl-2-acetamido-2-deoxy-alpha-D-galactopyranuronic acid                                                   | modified |     | D | pyranose     | alpha | aldose |
| DJE | 2-acetamido-2-deoxy-alpha-D-galactopyranuronic acid                                                              | modified |     | D | pyranose     | alpha | aldose |
| DK4 | 1-(3-deoxy-3-fluoro-beta-D-glucopyranosyl)-5-fluoropyrimidine-2,4(1H,3H)-dione                                   | modified |     | D | pyranose     | beta  | aldose |
| DKX | 1-(3-deoxy-3-fluoro-beta-D-glucopyranosyl)pyrimidine-2,4(1H,3H)-dione                                            | modified |     | D | pyranose     | beta  | aldose |
| DKZ | 4-amino-1-(3-deoxy-3-fluoro-beta-D-glucopyranosyl)pyrimidin-2(1H)-one                                            | modified |     | D | pyranose     | beta  | aldose |
| DL6 | N-(azidoacetyl)-beta-D-glucopyranosylamine                                                                       | modified |     | D | pyranose     | beta  | aldose |
| DLF | 2-deoxy-alpha-L-fucopyranose                                                                                     | modified |     | L | pyranose     | alpha | aldose |

|     |                                                                                                                     |          |     |  |   |              |       |        |
|-----|---------------------------------------------------------------------------------------------------------------------|----------|-----|--|---|--------------|-------|--------|
| DLG | hexyl 3-deoxy-beta-D-galactopyranoside                                                                              | modified |     |  | D | pyranose     | beta  | aldose |
| DO8 | 3-deoxy-8-O-phosphono-alpha-D-manno-oct-2-ulopyranosonic acid                                                       | modified | KDO |  | D | pyranose     | alpha | ketose |
| DPC | 5-ACETYLAMINO-4-AMINO-6-(PHENETHYL-PROPYL-CARBAMOYL)-5,6-DIHYDRO-4H-PYRAN-2-CARBOXYLIC ACID                         | modified |     |  | L | dihydropyran |       | ketose |
| DRI | 2,6-dideoxy-4-O-methyl-beta-D-glucopyranose                                                                         | modified |     |  | D | pyranose     | beta  | aldose |
| DSR | 2,6-dideoxy-4-thio-beta-D-allopyranose                                                                              | modified |     |  | D | pyranose     | beta  | aldose |
| DT6 | 2,4-bisacetamido-2,4-dideoxy-beta-D-glucopyranose                                                                   | modified |     |  | D | pyranose     | beta  | aldose |
| DVC | (2R,4S,6S)-4-azanyl-4,6-dimethyl-oxane-2,5,5-triol                                                                  | modified |     |  | L | pyranose     | alpha | aldose |
| DYM | (2R)-2,3-dihydroxypropyl 2-acetamido-2,4-dideoxy-alpha-L-threo-hex-4-enopyranosiduronic acid                        | modified |     |  | L | dihydropyran | alpha | ketose |
| E3M | (1R)-4-acetamido-3-amino-1,5-anhydro-2,3,4-trideoxy-1-sulfo-D-glycero-D-galacto-octitol                             | modified |     |  | D | pyranose     |       | aldose |
| E5G | 5-hydroxypentyl alpha-D-glucopyranoside                                                                             | modified | GLC |  | D | pyranose     | alpha | aldose |
| EAG | 2-aminoethyl 2-acetamido-2-deoxy-beta-D-glucopyranoside                                                             | modified | NAG |  | D | pyranose     | beta  | aldose |
| EBG | 2-[(2S)-oxiran-2-yl]ethyl alpha-D-glucopyranoside                                                                   | modified | GLC |  | D | pyranose     | alpha | aldose |
| EBQ | (3S)-3-hydroxybutyl alpha-D-glucopyranoside                                                                         | modified | GLC |  | D | pyranose     | alpha | aldose |
| EEN | 2-deoxy-2-[(difluoroacetyl)amino]-alpha-D-galactopyranose                                                           | modified | A2G |  | D | pyranose     | alpha | aldose |
| EEQ | 2-deoxy-2-[(fluoroacetyl)amino]-alpha-D-galactopyranose                                                             | modified | A2G |  | D | pyranose     | alpha | aldose |
| EGA | ethyl beta-D-galactopyranoside                                                                                      | modified | GAL |  | D | pyranose     | beta  | aldose |
| EMP | 2,4-dideoxy-4-(ethylamino)-3-O-methyl-alpha-L-threo-pentopyranose                                                   | modified |     |  | L | pyranose     | alpha | aldose |
| EMZ | 6-O-methyl-beta-D-galactopyranose                                                                                   | modified | GAL |  | D | pyranose     | beta  | aldose |
| EPG | (2R)-oxiran-2-ylmethyl alpha-D-glucopyranoside                                                                      | modified | GLC |  | D | pyranose     | alpha | aldose |
| EQP | (1R)-4-acetamido-1,5-anhydro-2,4-dideoxy-1-phosphono-D-glycero-D-galacto-octitol                                    | modified |     |  | D | pyranose     |       | ketose |
| EQV | Loganic acid                                                                                                        | modified |     |  | D | pyranose     | beta  | aldose |
| ERE | 4-epi-vancosamine                                                                                                   | modified |     |  | L | pyranose     | alpha | aldose |
| ERI | 3-C-methyl-4-O-acetyl-alpha-L-Olivopyranose                                                                         | modified | RAE |  | L | pyranose     | alpha | aldose |
| ETT | 5-acetamido-2,6-anhydro-3,5-dideoxy-3-[(2E)-3-(4-methylphenyl)prop-2-en-1-yl]-D-glycero-D-galacto-non-2-enonic acid | modified |     |  | D | dihydropyran |       | ketose |
| F1P | 1-O-phosphono-beta-D-fructopyranose                                                                                 | modified | BDF |  | D | pyranose     | beta  | ketose |
| F1X | 1-O-phosphono-beta-D-fructofuranose                                                                                 | modified | FRU |  | D | furanose     | beta  | ketose |
| F55 | N-[(4-chlorophenyl)carbonyl]carbamoyle-beta-D-glucopyranosylamine                                                   | modified |     |  | D | pyranose     | beta  | aldose |
| F58 | N-[(cyclohexylcarbonyl)carbamoyle]-beta-D-glucopyranosylamine                                                       | modified |     |  | D | pyranose     | beta  | aldose |
| F6P | 6-O-phosphono-beta-D-fructofuranose                                                                                 | modified | FRU |  | D | furanose     | beta  | ketose |
| FBP | 1,6-di-O-phosphono-beta-D-fructofuranose                                                                            | modified | FRU |  | D | furanose     | beta  | ketose |
| FDP | 2,6-di-O-phosphono-beta-D-fructofuranose                                                                            | modified | FRU |  | D | furanose     | beta  | ketose |
| FDQ | 2,5-anhydro-1-deoxy-1-phosphono-6-O-phosphono-D-glucitol                                                            | modified |     |  | D | furanose     |       |        |
| FFX | (2R,3S,5R,6S)-2,6-DIFLUOROOXANE-3,4,5-TRIOLE                                                                        | modified |     |  | D | pyranose     |       |        |
| FIF | 2,6-anhydro-5-deoxy-5-fluoro-L-idonic acid                                                                          | modified |     |  | L | pyranose     |       | aldose |
| FK9 | 3-(propylsulfanyl)propyl alpha-D-mannopyranoside                                                                    | modified | MAN |  | D | pyranose     | alpha | aldose |
| FKD | 3-deoxy-3-fluoro-D-erythro-alpha-L-manno-non-2-ulopyranosonic acid                                                  | modified |     |  | L | pyranose     | alpha | ketose |
| FMF | 2-deoxy-2-fluoro-beta-D-mannopyranosyl fluoride                                                                     | modified |     |  | D | pyranose     |       | aldose |
| FNG | 5-aminocarbonyl-3-nitrophenyl alpha-D-galactopyranoside                                                             | modified | GLA |  | D | pyranose     | alpha | aldose |
| FSA | 1-S-(carboxymethyl)-1-thio-beta-D-fructopyranose                                                                    | modified |     |  | D | pyranose     | beta  | ketose |

|     |                                                                                                                          |          |     |  |   |              |       |        |
|-----|--------------------------------------------------------------------------------------------------------------------------|----------|-----|--|---|--------------|-------|--------|
| FSI | 5-acetamido-3,5-dideoxy-3-fluoro-D-erythro-alpha-L-mannono-2-ulopyranosonic acid                                         | modified | SLB |  | D | pyranose     | beta  | ketose |
| FSR | (2S,3S,4R,5R,6R)-5-acetamido-2,3-bis(fluoranyl)-4-oxidanyl-6-[(1S,2S)-1,2,3-tris(oxidanyl)propyl]oxane-2-carboxylic acid | modified |     |  | L | pyranose     |       | ketose |
| FSW | methyl 6-deoxy-2-Se-methyl-2-seleno-alpha-L-galactopyranoside                                                            | modified |     |  | L | pyranose     | alpha | aldose |
| FUF | 2-deoxy-2-fluoro-beta-L-fucopyranose                                                                                     | modified |     |  | L | pyranose     | beta  | aldose |
| FUY | beta-L-fucosyl-azide                                                                                                     | modified |     |  | L | pyranose     | beta  | aldose |
| FVQ | 3-(pyridin-3-yl)prop-2-yn-1-yl alpha-D-mannopyranoside                                                                   | modified | MAN |  | D | pyranose     | alpha | aldose |
| FX1 | beta-D-threo-hexo-2,4-diulo-2,5-furanose                                                                                 | modified |     |  | D | furanose     | beta  | ketose |
| FYJ | phenyl 1-thio-beta-D-glucopyranosiduronic acid                                                                           | modified |     |  | D | pyranose     | beta  | aldose |
| G0S | 3-(beta-D-galactopyranosylthio)propanoic acid                                                                            | modified |     |  | D | pyranose     | beta  | aldose |
| G16 | 1,6-di-O-phosphono-alpha-D-glucopyranose                                                                                 | modified | GLC |  | D | pyranose     | alpha | aldose |
| G1P | 1-O-phosphono-alpha-D-glucopyranose                                                                                      | modified | GLC |  | D | pyranose     | alpha | aldose |
| G20 | 5-N-acetyl-4-guanidino-6-methyl(propyl) carboxamide-4,5-dihydro-2H-pyran-2-carboxylic acid                               | modified |     |  | L | dihydropyran |       | ketose |
| G28 | 5-N-acetyl-4-amino-6-diethyl carboxamide-4,5-dihydro-2H-pyran-2-carboxylic acid                                          | modified |     |  | L | dihydropyran |       | ketose |
| G2F | 2-deoxy-2-fluoro-alpha-D-glucopyranose                                                                                   | modified |     |  | D | pyranose     | alpha | aldose |
| G3F | 3-deoxy-3-fluoro-beta-D-glucopyranose                                                                                    | modified |     |  | D | pyranose     | beta  | aldose |
| G4D | 4-deoxy-alpha-D-glucopyranose                                                                                            | modified |     |  | D | pyranose     | alpha | aldose |
| G4S | 4-O-sulfo-beta-D-galactopyranose                                                                                         | modified | GAL |  | D | pyranose     | beta  | aldose |
| G6P | 6-O-phosphono-alpha-D-glucopyranose                                                                                      | modified | GLC |  | D | pyranose     | alpha | aldose |
| G6S | 6-O-sulfo-beta-D-galactopyranose                                                                                         | modified | GAL |  | D | pyranose     | beta  | aldose |
| G7P | 6,7-dideoxy-7-phosphono-beta-D-gluco-heptopyranose                                                                       | modified |     |  | D | pyranose     | beta  | aldose |
| G8Z | prop-2-en-1-yl 4-O-methyl-alpha-D-mannopyranoside                                                                        | modified | MAN |  | D | pyranose     | alpha | aldose |
| GAA | 3-nitrophenyl alpha-D-galactopyranoside                                                                                  | modified | GLA |  | D | pyranose     | alpha | aldose |
| GAD | 2,6-anhydro-3-deoxy-L-threo-hex-2-enonic acid                                                                            | modified |     |  | L | dihydropyran |       | aldose |
| GAF | 2-deoxy-2-fluoro-alpha-D-galactopyranose                                                                                 | modified |     |  | D | pyranose     | alpha | aldose |
| GAT | 4-aminophenyl alpha-D-galactopyranoside                                                                                  | modified | GLA |  | D | pyranose     | alpha | aldose |
| GBH | 2-{4-[2-(beta-D-glucopyranosyloxy)ethyl]piperazin-1-yl}ethanesulfonic acid                                               | modified | BGC |  | D | pyranose     | beta  | aldose |
| GC1 | 2,6-anhydro-L-gulonic acid                                                                                               | modified |     |  | D | pyranose     |       | aldose |
| GC4 | 4-deoxy-beta-D-glucopyranuronic acid                                                                                     | modified |     |  | D | pyranose     | beta  | aldose |
| GC9 | 2,6-anhydro-3,5-dideoxy-5-[(hydroxyacetyl)amino]-D-glycero-L-altro-non-2-enonic acid                                     | modified |     |  | L | dihydropyran |       | ketose |
| GCB | (2S,3S,4S,5R)-3,4,5-trihydroxy-6-oxo-oxane-2-carboxylic acid                                                             | modified |     |  | D | pyranose     |       | aldose |
| GCD | 4-deoxy-alpha-L-threo-hex-4-enopyranuronic acid                                                                          | modified |     |  | L | dihydropyran | alpha | aldose |
| GCN | 2-amino-2,3-dideoxy-alpha-D-glucopyranose                                                                                | modified |     |  | D | pyranose     | alpha | aldose |
| GCT | 2,6-anhydro-3-deoxy-L-xylo-hexonic acid                                                                                  | modified |     |  | D | pyranose     |       | aldose |
| GCV | 4-O-methyl-alpha-D-glucopyranuronic acid                                                                                 | modified | GCU |  | D | pyranose     | alpha | aldose |
| GCW | 4-O-methyl-beta-D-glucopyranuronic acid                                                                                  | modified | BDP |  | D | pyranose     | beta  | aldose |
| GDA | 4-amino-4-deoxy-beta-D-glucopyranose                                                                                     | modified |     |  | D | pyranose     | alpha | aldose |
| GDL | 2-(acetylamido)-2-deoxy-D-glucono-1,5-lactone                                                                            | modified |     |  | D | pyranose     |       | aldose |
| GE1 | 2,6-diamino-2,3,4,6-tetradeoxy-alpha-D-erythro-hexopyranose                                                              | modified |     |  | D | pyranose     | alpha | aldose |
| GE3 | 3-deoxy-4-C-methyl-3-(methylamino)-beta-L-arabinopyranose                                                                | modified |     |  | L | pyranose     | beta  | aldose |
| GFP | 2-deoxy-2-fluoro-1-O-phosphono-alpha-D-glucopyranose                                                                     | modified |     |  | D | pyranose     | alpha | aldose |
| GL1 | 1-O-phosphono-alpha-D-galactopyranose                                                                                    | modified | GLA |  | D | pyranose     | alpha | aldose |

|     |                                                                                                                |          |     |   |              |       |        |
|-----|----------------------------------------------------------------------------------------------------------------|----------|-----|---|--------------|-------|--------|
| GL2 | (5S,7R,8S,9S,10R)-3-amino-8,9,10-trihydroxy-7-(hydroxymethyl)-6-oxa-1,3-diazaspiro[4.5]decane-2,4-dione        | modified |     | D | pyranose     |       | aldose |
| GL4 | (5S,7R,8S,9S,10R)-8,9,10-trihydroxy-7-(hydroxymethyl)-2-thio-6-oxa-1,3-diazaspiro[4.5]decan-4-one              | modified |     | D | pyranose     |       | aldose |
| GL5 | (5S,7R,8S,9S,10R)-3,8,9,10-tetrahydroxy-7-(hydroxymethyl)-6-oxa-1,3-diazaspiro[4.5]decane-2,4-dione            | modified |     | D | pyranose     |       | aldose |
| GL6 | N-(dimethoxyphosphoryl)-beta-D-glucopyranosylamine                                                             | modified |     | D | pyranose     | beta  | aldose |
| GL7 | 8,9,10-TRIHYDROXY-7-HYDROXYMETHYL-3-METHYL-6-OXA-1,3-DIAZA-SPIRO[4.5]DECANE-2,4-DIONE                          | modified |     | D | pyranose     |       | aldose |
| GL9 | N-[(5S,7R,8S,9S,10R)-8,9,10-trihydroxy-7-(hydroxymethyl)-2,4-dioxo-6-oxa-1,3-diazaspiro[4.5]dec-3-yl]acetamide | modified |     | D | pyranose     |       | aldose |
| GLD | 4,6-dideoxy-alpha-D-xyllo-hexopyranose                                                                         | modified |     | D | pyranose     | alpha | aldose |
| GLF | alpha-D-glucopyranosyl fluoride                                                                                | modified |     | D | pyranose     |       | aldose |
| GLG | ALPHA-D-GLUCOPYRANOSYL-2-CARBOXYLIC ACID AMIDE                                                                 | modified |     | D | pyranose     |       |        |
| GLP | 2-amino-2-deoxy-6-O-phosphono-alpha-D-glucopyranose                                                            | modified | PA1 | D | pyranose     | alpha | aldose |
| GLS | BETA-D-GLUCOPYRANOSE SPIROHYDANTOIN                                                                            | modified |     | D | pyranose     | beta  | aldose |
| GLT | 5-thio-alpha-D-glucopyranose                                                                                   | modified |     | D | thiopyranose | alpha | aldose |
| GM0 | 4-O-phosphono-L-glycero-alpha-D-manno-heptopyranose                                                            | modified | GMH | D | pyranose     | alpha | aldose |
| GMB | 1,7-di-O-phosphono-L-glycero-beta-D-manno-heptopyranose                                                        | modified |     | D | pyranose     | beta  | aldose |
| GMT | (2S)-2-[[2-acetamido-2-deoxy-alpha-D-glucopyranosyl]oxy]butanedioic acid                                       | modified | NDG | D | pyranose     | alpha | aldose |
| GMZ | 1,7-di-O-phosphono-D-glycero-beta-D-manno-heptopyranose                                                        | modified |     | D | pyranose     | beta  | aldose |
| GN1 | 2-acetamido-2-deoxy-1-O-phosphono-alpha-D-glucopyranose                                                        | modified | NDG | D | pyranose     | alpha | aldose |
| GN4 | 2-acetamido-2-deoxy-4-O-phosphono-beta-D-glucopyranose                                                         | modified | BM7 | D | pyranose     | beta  | aldose |
| GNS | 2-deoxy-2-(sulfoamino)-alpha-D-glucopyranose                                                                   | modified | PA1 | D | pyranose     | alpha | aldose |
| GNX | 2-deoxy-3-O-sulfo-2-(sulfoamino)-alpha-D-glucopyranose                                                         | modified | PA1 | D | pyranose     | alpha | aldose |
| GP0 | 5-fluoro-1-[3-C-(hydroxymethyl)-beta-D-glucopyranosyl]pyrimidine-2,4(1H,3H)-dione                              | modified |     | D | pyranose     | beta  | aldose |
| GP1 | 2-amino-2-deoxy-1-O-phosphono-alpha-D-glucopyranose                                                            | modified | PA1 | D | pyranose     | alpha | aldose |
| GP4 | 2-amino-2-deoxy-4-O-phosphono-alpha-D-glucopyranose                                                            | modified |     | D | pyranose     | alpha | aldose |
| GPH | 4-O-phosphono-D-glycero-beta-D-manno-heptopyranose                                                             | modified |     | D | pyranose     | beta  | aldose |
| GPK | 5-fluoro-1-(beta-D-glucopyranosyl)pyrimidine-2,4(1H,3H)-dione                                                  | modified |     | D | pyranose     | beta  | aldose |
| GPM | (1S)-1,5-anhydro-1-(phosphonomethyl)-D-glucitol                                                                | modified |     | D | pyranose     |       | aldose |
| GPQ | 5-chloro-1-(beta-D-glucopyranosyl)pyrimidine-2,4(1H,3H)-dione                                                  | modified |     | D | pyranose     | beta  | aldose |
| GPU | 5-bromo-1-(beta-D-glucopyranosyl)pyrimidine-2,4(1H,3H)-dione                                                   | modified |     | D | pyranose     | beta  | aldose |
| GPV | 1-(beta-D-glucopyranosyl)-5-iodopyrimidine-2,4(1H,3H)-dione                                                    | modified |     | D | pyranose     | beta  | aldose |
| GPW | 1-(beta-D-glucopyranosyl)-5-(trifluoromethyl)pyrimidine-2,4(1H,3H)-dione                                       | modified |     | D | pyranose     | beta  | aldose |
| GQ1 | 4-O-sulfo-alpha-D-glucopyranose                                                                                | modified | GLC | D | pyranose     | alpha | aldose |
| GRF | 5-O-phosphono-beta-D-ribofuranosylamine                                                                        | modified |     | D | furanose     | beta  | aldose |
| GRX | (1R)-1,5-anhydro-1-[(S)-fluoro(phosphono)methyl]-D-glucitol                                                    | modified |     | D | pyranose     |       |        |
| GS1 | 1-thio-beta-D-glucopyranose                                                                                    | modified |     | D | pyranose     | beta  | aldose |
| GS9 | naphthalen-2-yl 1-thio-beta-D-galactopyranoside                                                                | modified |     | D | pyranose     | beta  | aldose |
| GTM | methyl 4-thio-beta-D-glucopyranoside                                                                           | modified |     | D | pyranose     | beta  | aldose |
| GU0 | 2,3,6-tri-O-sulfonato-beta-D-glucopyranose                                                                     | modified | BGC | D | pyranose     | beta  | aldose |
| GU1 | 2,3-di-O-methyl-beta-D-glucopyranuronic acid                                                                   | modified | BDP | D | pyranose     | beta  | aldose |
| GU2 | 2,3-di-O-methyl-alpha-L-idopyranuronic acid                                                                    | modified | ZOF | L | pyranose     | alpha | aldose |
| GU3 | methyl 3-O-methyl-2,6-di-O-sulfo-alpha-D-glucopyranoside                                                       | modified | GLC | D | pyranose     | alpha | aldose |



|     |                                                                                                                                  |          |     |  |   |              |       |        |
|-----|----------------------------------------------------------------------------------------------------------------------------------|----------|-----|--|---|--------------|-------|--------|
| GU4 | 2,3,4,6-tetra-O-sulfonato-alpha-D-glucopyranose                                                                                  | modified | GLC |  | D | pyranose     | alpha | aldose |
| GU5 | 2,3-di-O-methyl-6-O-sulfonato-alpha-D-glucopyranose                                                                              | modified | GLC |  | D | pyranose     | alpha | aldose |
| GU6 | 2,3,6-tri-O-sulfo-alpha-D-glucopyranose                                                                                          | modified | GLC |  | D | pyranose     | alpha | aldose |
| GU8 | 2,3,6-tri-O-methyl-beta-D-glucopyranose                                                                                          | modified | BGC |  | D | pyranose     | beta  | aldose |
| GU9 | 2,3,6-tri-O-methyl-alpha-D-glucopyranose                                                                                         | modified | GLC |  | D | pyranose     | alpha | aldose |
| GUF | 2-deoxy-2-fluoro-beta-D-glucopyranuronic acid                                                                                    | modified |     |  | D | pyranose     | beta  | aldose |
| GUL | (2R,3S,4R,5S)-2,6-difluoro-2-(hydroxymethyl)oxane-3,4,5-triol                                                                    | modified |     |  | L | pyranose     |       | aldose |
| GUZ | 2-deoxy-2-fluoro-alpha-D-glucopyranuronic acid                                                                                   | modified |     |  | D | pyranose     | alpha | aldose |
| GYG | (1R)-4-acetamido-1,5-anhydro-3-carbamimidamido-2,3,4-trideoxy-1-sulfo-D-glycero-D-galacto-octitol                                | modified |     |  | D | pyranose     | beta  | ketose |
| GYP | methyl alpha-D-glucopyranoside                                                                                                   | modified | GLC |  | D | pyranose     | alpha | aldose |
| GYU | 2-acetamido-2-deoxy-1-O-(propylcarbamoyl)-alpha-D-glucopyranose                                                                  | modified | PA1 |  | D | pyranose     | alpha | aldose |
| GYV | 2-acetamido-1-O-carbamoyl-2-deoxy-alpha-D-glucopyranose                                                                          | modified |     |  | D | pyranose     | alpha | aldose |
| H1M | methyl 2-deoxy-2-(2-hydroxyethyl)-alpha-D-mannopyranoside                                                                        | modified |     |  | D | pyranose     | alpha | aldose |
| H2P | 1-deoxy-2-O-phosphono-alpha-D-gluco-hept-2-ulopyranose                                                                           | modified | GLC |  | D | pyranose     | alpha | aldose |
| H53 | (1S)-1,5-anhydro-1-(2,5-dihydroxyphenyl)-D-glucitol                                                                              | modified |     |  | D | pyranose     |       | aldose |
| H6Q | 2-O-[(R)-{[(2S)-1,1-dihydroxypropan-2-yl]oxy}(hydroxy)phosphoryl]-beta-D-glucopyranose                                           | modified | BGC |  | D | pyranose     | beta  | aldose |
| H6Z | 2-O-[(R)-{[(2S)-1,1-dihydroxypropan-2-yl]oxy}(hydroxy)phosphoryl]-alpha-D-glucopyranose                                          | modified | GLC |  | D | pyranose     | alpha | aldose |
| HBZ | N-[[4-(4-hydroxyphenyl)carbonyl]carbamoyl]-beta-D-glucopyranosylamine                                                            | modified |     |  | D | pyranose     | beta  | aldose |
| HD4 | 4-O-[2-acetamido-2-deoxy-beta-D-glucopyranosyl]-1-O-phosphono-D-ribitol                                                          | modified | NAG |  | D | pyranose     | beta  | aldose |
| HNV | 3-(4-methoxyphenyl)prop-2-yn-1-yl alpha-D-mannopyranoside                                                                        | modified | MAN |  | D | pyranose     | alpha | aldose |
| HNW | 4-(3-hydroxyprop-1-yn-1-yl)phenyl alpha-D-mannopyranoside                                                                        | modified | MAN |  | D | pyranose     | alpha | aldose |
| HSG | octyl alpha-L-altropyranoside                                                                                                    | modified | Z6H |  | L | pyranose     | alpha | aldose |
| HSH | octyl beta-D-galactopyranoside                                                                                                   | modified | GAL |  | D | pyranose     | beta  | aldose |
| HSJ | octyl beta-L-talopyranoside                                                                                                      | modified | ZEE |  | L | pyranose     | beta  | aldose |
| HSX | 5-O-phosphono-alpha-D-ribofuranose                                                                                               | modified | RIB |  | D | furanose     | alpha | aldose |
| HTG | heptyl 1-thio-beta-D-glucopyranoside                                                                                             | modified |     |  | D | pyranose     | beta  | aldose |
| HTM | 3-hydroxypropyl 2-acetamido-2,4-dideoxy-alpha-L-threo-hex-4-enopyranosiduronic acid                                              | modified |     |  | L | dihydropyran | alpha | ketose |
| I57 | 2,6-anhydro-3,4,5-trideoxy-5-[(2-methylpropanoyl)amino]-4-(4-phenyl-1H-1,2,3-triazol-1-yl)-D-glycero-D-galacto-non-2-enonic acid | modified |     |  | D | dihydropyran |       | ketose |
| IDC | (5R,6R,7R,8S)-7,8-dihydroxy-5-(hydroxymethyl)-5,6,7,8-tetrahydroimidazo[1,2-a]pyridin-6-yl beta-D-glucopyranoside                | modified | BGC |  | D | pyranose     | beta  | aldose |
| IDF | 5-fluoro-alpha-L-idopyranosyluronic acid fluoride                                                                                | modified |     |  | L | pyranose     |       | aldose |
| IDG | 2,6-diamino-2,6-dideoxy-beta-L-idopyranose                                                                                       | modified |     |  | L | pyranose     | beta  | aldose |
| IDS | 2-O-sulfo-alpha-L-idopyranuronic acid                                                                                            | modified | IDR |  | L | pyranose     | alpha | aldose |
| IDU | 2-O-sulfo-beta-L-altropyranuronic acid                                                                                           | modified | 3MK |  | L | pyranose     | beta  | aldose |
| IDX | 2-O-sulfo-alpha-L-gulopyranuronic acid                                                                                           | modified | LGU |  | L | pyranose     | alpha | aldose |
| IDY | 1-O-methyl-2-O-sulfo-alpha-L-idopyranuronic acid                                                                                 | modified | IDR |  | L | pyranose     | alpha | aldose |
| IEM | 2-methylpropyl 2-acetamido-2,4-dideoxy-alpha-L-threo-hex-4-enopyranosiduronic acid                                               | modified |     |  | L | dihydropyran | alpha | ketose |
| IN1 | 4-(beta-D-glucopyranosyloxy)-2,2-dihydroxybutyl propanoate                                                                       | modified | BGC |  | D | pyranose     | beta  | aldose |
| IPT | 1-methylethyl 1-thio-beta-D-galactopyranoside                                                                                    | modified |     |  | D | pyranose     | beta  | aldose |
| ISD | ISOASCORBIC ACID                                                                                                                 | modified |     |  | D | dihydrofuran |       | aldose |
| ISL | 6-O-alpha-D-glucopyranosyl-D-fructose                                                                                            | modified | GLC |  | D | pyranose     | alpha | aldose |

|     |                                                                                                                                        |          |     |  |   |              |       |        |
|-----|----------------------------------------------------------------------------------------------------------------------------------------|----------|-----|--|---|--------------|-------|--------|
| ISX | (3R,4R,5R)-4-hydroxy-5-(hydroxymethyl)piperidin-3-yl beta-D-glucopyranoside                                                            | modified | BGC |  | D | pyranose     | beta  | aldose |
| IXD | 4-deoxy-2-O-sulfo-beta-D-erythro-hex-4-enopyranuronic acid                                                                             | modified |     |  | D | dihydropyran | beta  | ketose |
| J5B | (3R)-3-hydroxybutyl alpha-D-glucopyranoside                                                                                            | modified | GLC |  | D | pyranose     | alpha | aldose |
| JFZ | 4-nitrophenyl 6-deoxy-alpha-L-galactopyranoside                                                                                        | modified | FUC |  | L | pyranose     | alpha | aldose |
| JHM | 2-deoxy-6-O-sulfo-alpha-D-glucopyranose                                                                                                | modified |     |  | D | pyranose     | alpha | aldose |
| JLT | 3,7-anhydro-1,2,8-trideoxy-1,8-diphosphono-D-glycero-D-gulo-octitol                                                                    | modified |     |  | D | pyranose     |       |        |
| JS2 | 5-O-[[[(R)-[[[(S)-[4-(8-amino-6-oxo-1,6-dihydro-9H-purin-9-yl)butoxy](hydroxy)phosphoryl]oxy](hydroxy)phosphoryl]-alpha-D-ribofuranose | modified | RIB |  | D | furanose     | alpha | aldose |
| JV4 | 6-deoxy-6-fluoro-1-O-phosphono-alpha-D-glucopyranose                                                                                   | modified |     |  | D | pyranose     | alpha | aldose |
| JVA | 2,6-anhydro-5,7-dideoxy-5-fluoro-7-phosphono-D-glycero-D-manno-heptitol                                                                | modified |     |  | D | pyranose     |       |        |
| JVS | 1-deoxy-1-fluoro-2-O-phosphono-alpha-D-gluco-hept-2-ulopyranose                                                                        | modified | GLC |  | D | pyranose     | alpha | aldose |
| JZR | hexyl beta-D-glucopyranoside                                                                                                           | modified | BGC |  | D | pyranose     | beta  | aldose |
| K5B | 4,7-anhydro-3-deoxy-D-gluco-oct-2-ulosonic acid                                                                                        | modified |     |  | D | furanose     |       |        |
| K99 | (2R,3R,4R,5R,6S)-2,3-bis(fluoranyl)-4,5-bis(oxidanyl)-6-[[[(1R,2R)-1,2,3-tris(oxidanyl)propyl]oxane-2-carboxylic acid                  | modified |     |  | D | pyranose     |       | ketose |
| KBA | 2-(1H-1,2,3-triazol-1-yl)ethyl 6-deoxy-alpha-L-galactopyranoside                                                                       | modified | FUC |  | L | pyranose     | alpha | aldose |
| KBG | beta-D-arabino-hexopyranos-2-ulose                                                                                                     | modified |     |  | D | pyranose     | beta  | aldose |
| KD5 | 4,7-anhydro-3-deoxy-D-manno-oct-2-ulosonic acid                                                                                        | modified |     |  | D | furanose     |       |        |
| KDA | prop-2-en-1-yl 3-deoxy-alpha-D-manno-oct-2-ulopyranosidonic acid                                                                       | modified | KDO |  | D | pyranose     | alpha | ketose |
| KDB | 3,4,5-trideoxy-alpha-D-erythro-oct-3-en-2-ulopyranosonic acid                                                                          | modified |     |  | D | dihydropyran | alpha | ketose |
| KDD | 2,6-anhydro-3,5-dideoxy-D-ribo-oct-2-enonic acid                                                                                       | modified |     |  | D | dihydropyran |       | ketose |
| KDE | prop-2-en-1-yl 3-deoxy-beta-L-gulo-oct-2-ulopyranosidonic acid                                                                         | modified |     |  | D | pyranose     | alpha | ketose |
| KDF | 3-deoxy-alpha-D-erythro-hex-2-ulofuranosonic acid                                                                                      | modified |     |  | D | furanose     | alpha | ketose |
| KDR | prop-2-en-1-yl 3-deoxy-alpha-D-manno-octos-2-ulopyranoside                                                                             | modified |     |  | D | pyranose     | alpha | ketose |
| KFN | 2,6-anhydro-3-deoxy-D-glycero-D-galacto-non-2-enonic acid                                                                              | modified |     |  | D | dihydropyran |       | ketose |
| KG1 | propadienyl 6-deoxy-alpha-L-galactopyranoside                                                                                          | modified | FUC |  | L | pyranose     | alpha | aldose |
| KGM | heptyl alpha-D-mannopyranoside                                                                                                         | modified | MAN |  | D | pyranose     | alpha | aldose |
| KHP | 4-nitrophenyl alpha-L-arabinofuranoside                                                                                                | modified | AHR |  | L | furanose     | alpha | aldose |
| KME | (1E)-prop-1-en-1-yl 3-deoxy-7-O-methyl-alpha-D-manno-oct-2-ulopyranosidonic acid                                                       | modified | KDO |  | D | pyranose     | alpha | ketose |
| KO1 | D-glycero-alpha-D-talo-oct-2-ulopyranosonic acid                                                                                       | modified |     |  | D | pyranose     | alpha | ketose |
| KO2 | prop-2-en-1-yl D-glycero-alpha-D-talo-oct-2-ulopyranosidonic acid                                                                      | modified | KDO |  | D | pyranose     | alpha | ketose |
| KOT | 1-beta-D-glucopyranosyl-4-phenyl-1H-1,2,3-triazole                                                                                     | modified |     |  | D | pyranose     | beta  | aldose |
| KTU | prop-2-en-1-yl 3,5-dideoxy-alpha-D-threo-oct-5-en-2-ulopyranosidonic acid                                                              | modified |     |  | D | dihydropyran | alpha | ketose |
| L6S | 6-O-sulfo-alpha-L-galactopyranose                                                                                                      | modified | GXL |  | L | pyranose     | alpha | aldose |
| LAH | 2-O-[(R)-hydroxy(propan-2-yloxy)phosphoryl]-alpha-L-arabinopyranose                                                                    | modified | ARA |  | L | pyranose     | alpha | aldose |
| LAO | 2-O-phosphono-alpha-L-arabinopyranose                                                                                                  | modified | ARA |  | L | pyranose     | alpha | aldose |
| LCN | 1,5-anhydro-D-arabino-hex-1-enitol                                                                                                     | modified |     |  | D | dihydropyran |       | aldose |
| LEC | 4-nitrophenyl 2-acetamido-2-deoxy-beta-D-glucopyranoside                                                                               | modified | NAG |  | D | pyranose     | beta  | aldose |
| LGC | D-glucono-1,5-lactone                                                                                                                  | modified |     |  | D | pyranose     |       | aldose |
| LKA | 5-thio-alpha-D-mannopyranosylamine                                                                                                     | modified |     |  | D |              | alpha | aldose |
| LKS | N-[(1Z)-2-phenylethanimidoyl]-5-thio-alpha-D-mannopyranosylamine                                                                       | modified |     |  | D | thiopyranose | alpha | aldose |

|      |                                                                                                                        |          |     |  |   |              |       |        |
|------|------------------------------------------------------------------------------------------------------------------------|----------|-----|--|---|--------------|-------|--------|
| LNV  | 5-acetamido-2,6-anhydro-4-carbamimidamido-3,4,5-trideoxy-7-O-methyl-D-glycero-D-galacto-non-2-enonic acid              | modified |     |  | D | dihydropyran |       | ketose |
| LOG  | N-acetylglucosaminono-1,5-lactone (Z)-oxime                                                                            | modified |     |  | D | pyranose     |       | aldose |
| LOX  | (2Z,3S,4S,5R)-2-hydroxyiminopiperidine-3,4,5-triol                                                                     | modified |     |  | D |              |       | aldose |
| LRH  | 6-deoxy-beta-L-fructofuranose                                                                                          | modified |     |  | L | furanose     | beta  | ketose |
| LVO  | 5-acetamido-2,6-anhydro-4-carbamimidamido-3,4,5-trideoxy-7-O-methyl-9-O-octanoyl-D-glycero-D-galacto-non-2-enonic acid | modified |     |  | D | dihydropyran |       | ketose |
| LVZ  | propan-2-yl 2-deoxy-6-O-sulfo-2-(sulfoamino)-alpha-D-glucopyranoside                                                   | modified |     |  | D | pyranose     | alpha | aldose |
| LZ0  | [1-(2-oxoethyl)-1H-1,2,3-triazol-5-yl]methyl 6-deoxy-alpha-L-galactopyranoside                                         | modified | FUC |  | L | pyranose     | alpha | aldose |
| M1P  | 1-O-phosphono-alpha-D-mannopyranose                                                                                    | modified | MAN |  | D | pyranose     | alpha | aldose |
| M2F  | 2,4-dinitrophenyl 2-deoxy-2-fluoro-beta-D-mannopyranoside                                                              | modified |     |  | D | pyranose     | beta  | aldose |
| M3N  | 4-(hydroxymethyl)-1-(alpha-D-mannopyranosyl)-1H-1,2,3-triazole                                                         | modified |     |  | D | pyranose     | alpha | aldose |
| M55  | benzyl alpha-D-glucopyranuronate                                                                                       | modified | GCU |  | D | pyranose     | alpha | aldose |
| M6D  | 6-O-phosphono-beta-D-mannopyranose                                                                                     | modified | BMA |  | D | pyranose     | beta  | aldose |
| M6P  | 6-O-phosphono-alpha-D-mannopyranose                                                                                    | modified | MAN |  | D | pyranose     | alpha | aldose |
| M7B  | 7-O-phosphono-D-glycero-beta-D-manno-heptopyranose                                                                     | modified |     |  | D | pyranose     | beta  | aldose |
| M7P  | 7-O-phosphono-D-glycero-alpha-D-manno-heptopyranose                                                                    | modified | 289 |  | D | pyranose     | alpha | aldose |
| M8C  | methyl alpha-D-galactopyranuronate                                                                                     | modified | ADA |  | D | pyranose     | alpha | aldose |
| MA1  | 1,4-dithio-alpha-D-glucopyranose                                                                                       | modified |     |  | D | pyranose     | alpha | aldose |
| MA2  | 4-S-methyl-4-thio-alpha-D-glucopyranose                                                                                | modified |     |  | D | pyranose     | alpha | aldose |
| MA3  | methyl 4-thio-alpha-D-glucopyranoside                                                                                  | modified |     |  | D | pyranose     | alpha | aldose |
| MA8  | (1S,2R,3R,4S,5S,6R)-2,3,4,5,6-pentahydroxycyclohexyl 2-(L-cysteinylamino)-2-deoxy-alpha-D-glucopyranoside              | modified | NDG |  | D | pyranose     | alpha | aldose |
| MAF  | 2-deoxy-2-fluoro-alpha-D-mannopyranose                                                                                 | modified |     |  | D | pyranose     | alpha | aldose |
| MAG  | methyl 2-acetamido-2-deoxy-beta-D-glucopyranoside                                                                      | modified | NAG |  | D | pyranose     | beta  | aldose |
| MAT  | 2,4-dideoxy-3-O-methyl-4-(propan-2-ylamino)-alpha-L-threo-pentopyranose                                                | modified |     |  | L | pyranose     | alpha | aldose |
| MAW  | 4-deoxy-alpha-L-erythro-hex-4-enopyranuronic acid                                                                      | modified |     |  | L | dihydropyran | alpha | aldose |
| MBE  | 4-nitrophenyl beta-D-mannopyranoside                                                                                   | modified | BMA |  | D | pyranose     | beta  | aldose |
| MBF  | 2-deoxy-2-fluoro-beta-D-mannopyranose                                                                                  | modified |     |  | D | pyranose     | beta  | aldose |
| MBG  | methyl beta-D-galactopyranoside                                                                                        | modified | GAL |  | D | pyranose     | beta  | aldose |
| MCU  | methyl 4-O-methyl-beta-D-glucopyranuronate                                                                             | modified | BDP |  | D | pyranose     | beta  | aldose |
| MDA  | 2,6-dideoxy-3-C-methyl-beta-D-ribo-hexopyranose                                                                        | modified |     |  | D | pyranose     | beta  | aldose |
| MDP  | N-carboxyl-N-methyl-beta-muramic acid                                                                                  | modified | MUR |  | D | pyranose     | beta  | aldose |
| MFB  | methyl beta-L-fucopyranoside                                                                                           | modified | FUL |  | L | pyranose     | beta  | aldose |
| MFU  | methyl alpha-L-fucopyranoside                                                                                          | modified | FUC |  | L | pyranose     | alpha | aldose |
| MG5  | 2,3,4-tri-O-propanoyl-6-O-sulfamoyl-beta-D-glucopyranose                                                               | modified | BGC |  | D | pyranose     | beta  | aldose |
| MGC  | methyl 2-acetamido-2-deoxy-alpha-D-galactopyranoside                                                                   | modified | A2G |  | D | pyranose     | alpha | aldose |
| MGL  | methyl beta-D-glucopyranoside                                                                                          | modified | BGC |  | D | pyranose     | beta  | aldose |
| MGS  | methyl 4,6-dideoxy-4-[[[(2R)-2,4-dihydroxybutanoyl]amino]-2-O-methyl-alpha-D-mannopyranoside                           | modified |     |  | D | pyranose     | alpha | aldose |
| MJJ  | methyl 9-O-acetyl-5-acetamido-3,5-dideoxy-D-glycero-alpha-D-galacto-non-2-ulopyranosidonic acid                        | modified | SIA |  | D | pyranose     | alpha | ketose |
| MM A | methyl alpha-D-mannopyranoside                                                                                         | modified | MAN |  | D | pyranose     | alpha | aldose |
| MNO  | methyl 3,5-dideoxy-5-[(hydroxyacetyl)amino]-D-glycero-alpha-D-galacto-non-2-ulopyranosidonic acid                      | modified | SIA |  | D | pyranose     | alpha | ketose |

|     |                                                                                                                                                   |          |     |  |   |          |       |        |
|-----|---------------------------------------------------------------------------------------------------------------------------------------------------|----------|-----|--|---|----------|-------|--------|
| MNA | 2-O-methyl-5-N-acetyl-alpha-D-neuraminic acid                                                                                                     | modified | SIA |  | D | pyranose | alpha | ketose |
| MQG | 2-deoxy-2-[[[(S)-hydroxy(methyl)phosphoryl]amino]-beta-D-glucopyranose                                                                            | modified | GCS |  | D | pyranose | beta  | aldose |
| MQT | methyl 2-O-acetyl-3-O-(4-methylbenzoyl)-beta-D-talopyranoside                                                                                     | modified | SDY |  | D | pyranose | beta  | aldose |
| MRH | 4-acetamido-4,6-dideoxy-alpha-D-mannopyranose                                                                                                     | modified |     |  | D | pyranose | alpha | aldose |
| MRP | 3-O-methyl-alpha-L-rhamnopyranose                                                                                                                 | modified | RAM |  | L | pyranose | alpha | aldose |
| MSX | methyl 1,6-dithio-alpha-D-mannopyranoside                                                                                                         | modified |     |  | D | pyranose | alpha | aldose |
| MXY | 2-O-methyl-beta-L-fucopyranose                                                                                                                    | modified | FUL |  | L | pyranose | beta  | aldose |
| MXZ | 2-O-methyl-alpha-L-fucopyranose                                                                                                                   | modified | FUC |  | L | pyranose | alpha | aldose |
| MYG | (1R,2R,3R,4R,5R,6S)-2,3,4,5,6-pentahydroxycyclohexyl 2-amino-2-deoxy-alpha-D-glucopyranoside                                                      | modified | PA1 |  | D | pyranose | alpha | aldose |
| N1L | 2-amino-2-deoxy-beta-D-glucopyranuronic acid                                                                                                      | modified |     |  | D | pyranose | beta  | aldose |
| NA1 | 2-acetamido-2-deoxy-6-O-methyl-alpha-D-allopyranose                                                                                               | modified |     |  | D | pyranose | alpha | aldose |
| NBG | N-acetyl-beta-D-glucopyranosylamine                                                                                                               | modified |     |  | D | pyranose | beta  | aldose |
| NBX | N-[[[(4-aminophenyl)carbonyl]carbamoyl]-beta-D-glucopyranosylamine                                                                                | modified |     |  | D | pyranose | beta  | aldose |
| NBY | N-[[[(4-nitrophenyl)carbonyl]carbamoyl]-beta-D-glucopyranosylamine                                                                                | modified |     |  | D | pyranose | beta  | aldose |
| NFG | 2,4-dinitrophenyl 2-deoxy-2-fluoro-beta-D-glucopyranoside                                                                                         | modified |     |  | D | pyranose | beta  | aldose |
| NG1 | 2-acetamido-2-deoxy-1-O-phosphono-alpha-D-galactopyranose                                                                                         | modified | A2G |  | D | pyranose | alpha | aldose |
| NG6 | 2-acetamido-2-deoxy-6-O-sulfo-beta-D-galactopyranose                                                                                              | modified | NGA |  | D | pyranose | beta  | aldose |
| NGK | 2-acetamido-2-deoxy-4-O-sulfo-alpha-D-galactopyranose                                                                                             | modified | A2G |  | D | pyranose | alpha | aldose |
| NGS | 2-acetamido-2-deoxy-6-O-sulfo-beta-D-glucopyranose                                                                                                | modified | NAG |  | D | pyranose | beta  | aldose |
| NGY | 2-acetamido-2-deoxy-6-O-sulfo-alpha-D-glucopyranose                                                                                               | modified | NDG |  | D | pyranose | alpha | aldose |
| NHF | 1,5-anhydro-D-fructose                                                                                                                            | modified |     |  | D | pyranose |       | aldose |
| NM6 | 2-acetamido-3-O-[(2R)-1-amino-1-oxopropan-2-yl]-2-deoxy-beta-D-glucopyranose                                                                      | modified | NAG |  | D | pyranose | beta  | aldose |
| NM9 | methyl 2-acetamido-3-O-[(2R)-1-amino-1-oxopropan-2-yl]-2-deoxy-beta-D-glucopyranoside                                                             | modified | NAG |  | D | pyranose | beta  | aldose |
| NNG | 2-deoxy-2-[[[(S)-hydroxy(methyl)phosphoryl]amino]-6-O-phosphono-alpha-D-glucopyranose                                                             | modified | PA1 |  | D | pyranose | alpha | aldose |
| NPF | 2-nitrophenyl beta-D-fucopyranoside                                                                                                               | modified | FCB |  | D | pyranose | beta  | aldose |
| NSQ | 4-nitrophenyl alpha-D-6-sulfoquinovoside                                                                                                          | modified | G6D |  | D | pyranose | alpha | aldose |
| NTF | N-(trifluoroacetyl)-beta-D-glucopyranosylamine                                                                                                    | modified |     |  | D | pyranose | beta  | aldose |
| NXD | methyl 5-acetamido-9-[[amino(oxo)acetyl]amino]-3,5,9-trideoxy-D-glycero-alpha-D-galacto-non-2-ulopyranosidonic acid                               | modified |     |  | D | pyranose | alpha | ketose |
| O1G | 3-deoxy-3-[(E)-{(3-hydroxy-2-methyl-5-[(phosphonoxy)methyl]pyridin-4-yl)methylidene)amino]-6-O-phosphono-alpha-D-glucopyranose                    | modified |     |  | D | pyranose | alpha | aldose |
| OAK | N-(phenylcarbonyl)-beta-D-glucopyranosylamine                                                                                                     | modified |     |  | D | pyranose | beta  | aldose |
| OEL | (6R)-2,6-anhydro-3,4,5-trideoxy-6-[(2S)-2,3-dihydroxypropanoyl]-3-fluoro-5-[(2-methylpropanoyl)amino]-4-triaza-1,2-dien-2-ium-1-yl-L-gulonic acid | modified |     |  | L | pyranose |       | ketose |
| OI7 | 1,7-di-O-phosphono-beta-D-altro-hept-2-ulofuranose                                                                                                | modified |     |  | D | furanose | beta  | ketose |
| OPM | pentyl alpha-D-mannopyranoside                                                                                                                    | modified | MAN |  | D | pyranose | alpha | aldose |
| OTG | 2-deoxy-2-[[[(2-methylphenyl)carbonyl]amino]-alpha-D-glucopyranose                                                                                | modified | PA1 |  | D | pyranose | alpha | aldose |
| OTN | 2-nitrophenyl 1-thio-beta-D-galactopyranoside                                                                                                     | modified |     |  | D | pyranose | beta  | aldose |
| OTU | 3-O-alpha-D-glucopyranosyl-D-fructose                                                                                                             | modified | GLC |  | D | pyranose | alpha | aldose |
| OX2 | (1R)-1,5-anhydro-1-(5-methyl-1,3,4-oxadiazol-2-yl)-D-glucitol                                                                                     | modified |     |  | D | pyranose |       | aldose |

|     |                                                                                                             |          |     |  |   |              |       |        |
|-----|-------------------------------------------------------------------------------------------------------------|----------|-----|--|---|--------------|-------|--------|
| P53 | 2-(hydroxymethyl)phenyl 6-O-phosphono-beta-D-glucopyranoside                                                | modified | BGC |  | D | pyranose     | beta  | aldose |
| P6P | 6-O-phosphono-alpha-D-fructofuranose                                                                        | modified | Z9N |  | D | furanose     | alpha | ketose |
| PAV | (2R,4S)-2-methyl-2,3,4-tetrahydroxytetrahydrofuran                                                          | modified |     |  | L | furanose     | alpha | ketose |
| PDX | 2,3-di-O-sulfo-alpha-D-glucopyranose                                                                        | modified | GLC |  | D | pyranose     | alpha | aldose |
| PH5 | benzyl 3,5-dideoxy-5-(propanoylamino)-D-glycero-alpha-D-galacto-non-2-ulopyranosidonic acid                 | modified | SIA |  | D | pyranose     | alpha | ketose |
| PKM | 4-O-acetyl-5-acetamido-3,5-dideoxy-D-glycero-alpha-D-galacto-non-2-ulopyranosonic acid                      | modified | SIA |  | D | pyranose     | alpha | ketose |
| PNA | 4-nitrophenyl alpha-D-mannopyranoside                                                                       | modified | MAN |  | D | pyranose     | alpha | aldose |
| PNG | 4-nitrophenyl alpha-D-glucopyranoside                                                                       | modified | GLC |  | D | pyranose     | alpha | aldose |
| PNJ | 4-nitrophenyl 2-amino-2-deoxy-beta-D-glucopyranoside                                                        | modified |     |  | D | pyranose     | beta  | aldose |
| PNW | 4-nitrophenyl beta-D-glucopyranoside                                                                        | modified | BGC |  | D | pyranose     | beta  | aldose |
| PPC | 1-O-[(R)-hydroxy(phosphonomethyl)phosphoryl]-5-O-phosphono-alpha-D-ribofuranose                             | modified | RIB |  | D | furanose     | alpha | aldose |
| PRP | 1-O-pyrophosphono-5-O-phosphono-alpha-D-ribofuranose                                                        | modified | RIB |  | D | furanose     | alpha | aldose |
| PSG | 4-nitrophenyl 1-thio-beta-D-glucopyranoside                                                                 | modified |     |  | D | pyranose     | beta  | aldose |
| PUF | 6-deoxy-alpha-L-psicofuranose                                                                               | modified |     |  | L | furanose     | alpha | ketose |
| QIF | 1-deoxy-7-O-phosphono-alpha-D-gluco-hept-2-ulopyranose                                                      | modified | GLC |  | D | pyranose     | alpha | aldose |
| R1P | 1-O-phosphono-alpha-D-ribofuranose                                                                          | modified | RIB |  | D | furanose     | alpha | aldose |
| R1X | 1,4-anhydro-D-ribitol                                                                                       | modified |     |  | D | furanose     |       | aldose |
| R2B | 1,4-anhydro-D-erythro-pent-1-enitol                                                                         | modified |     |  | D | dihydrofuran |       | aldose |
| R2G | 2,5-anhydro-4-deoxy-D-erythro-pent-4-enitol                                                                 | modified |     |  | L | dihydrofuran |       | aldose |
| RAO | methyl 6-deoxy-alpha-L-rhamnopyranoside                                                                     | modified | RAM |  | L | pyranose     | alpha | aldose |
| RER | vancosamine                                                                                                 | modified |     |  | L | pyranose     | alpha | aldose |
| RF5 | 2-deoxy-2-fluoro-5-O-phosphono-alpha-D-arabinofuranose                                                      | modified |     |  | D | furanose     | alpha | aldose |
| RGG | (2R)-2,3-dihydroxypropyl beta-D-galactopyranoside                                                           | modified | GAL |  | D | pyranose     | beta  | aldose |
| RHA | 6-deoxy-1-O-phosphono-alpha-L-rhamnopyranose                                                                | modified | RAM |  | L | pyranose     | alpha | aldose |
| RHC | (2S)-2-amino-4-[[[(2S,3S,4R,5R)-3,4,5-trihydroxyoxolan-2-yl]methylsulfanyl]butanoic acid                    | modified |     |  | D | furanose     | beta  | aldose |
| RI2 | 1,5-di-O-phosphono-alpha-D-ribofuranose                                                                     | modified | RIB |  | D | furanose     | alpha | aldose |
| RP3 | 3-deoxy-5-O-phosphono-beta-D-ribofuranose                                                                   | modified |     |  | D | furanose     | beta  | aldose |
| RP5 | 5-O-phosphono-beta-D-ribofuranose                                                                           | modified | BDR |  | D | furanose     | beta  | aldose |
| RP6 | 5-acetamido-2,6-anhydro-3,5-dideoxy-3-prop-2-en-1-yl-D-glycero-D-galacto-non-2-enonic acid                  | modified |     |  | D | dihydropyran |       | ketose |
| RR7 | 2-deoxy-beta-D-arabino-hexopyranose                                                                         | modified |     |  | D | pyranose     | beta  | aldose |
| RRJ | 4-chloro-4-deoxy-alpha-D-galactopyranose                                                                    | modified |     |  | D | pyranose     | alpha | aldose |
| RRY | 1,6-dichloro-1,6-dideoxy-beta-D-fructofuranose                                                              | modified |     |  | D | furanose     | beta  | ketose |
| RST | 3-amino-2,3,6-trideoxy-alpha-L-ribo-hexopyranose                                                            | modified |     |  | L | pyranose     | alpha | aldose |
| RTG | 6-O-phosphono-alpha-L-idopyranose                                                                           | modified | ZOF |  | L | pyranose     | alpha | aldose |
| RTV | 2-(acetylamino)-1,5-anhydro-2-deoxy-D-mannitol                                                              | modified |     |  | D | pyranose     |       | aldose |
| RUG | 1-beta-D-glucopyranosyl-4-(hydroxymethyl)-1H-1,2,3-triazole                                                 | modified |     |  | D | pyranose     | beta  | aldose |
| RVG | 6-deoxy-2,3-di-O-methyl-beta-D-glucopyranose                                                                | modified | YYK |  | D | pyranose     | beta  | aldose |
| RVM | 4,6-dideoxy-2,3-di-O-methyl-alpha-D-xylo-hexopyranose                                                       | modified |     |  | D | pyranose     | alpha | aldose |
| RWI | (2S)-2-[(2-deoxy-2-[(hydroxycarbamoyl)amino]-alpha-D-glucopyranosyl)oxy]butanedioic acid                    | modified | PA1 |  | D | pyranose     | alpha | aldose |
| RY7 | 4,6-dideoxy-4-[[[(1S,2S,3S,4R,5R)-2,3,4-trihydroxy-5-(hydroxymethyl)cyclohexyl]amino]-alpha-D-glucopyranose | modified |     |  | D | pyranose     | alpha | aldose |
| RZM | (2R,3R,4R,5R)-4-hydroxy-2,5-bis(hydroxymethyl)pyrrolidin-3-yl alpha-D-glucopyranoside                       | modified | GLC |  | D | pyranose     | alpha | aldose |

|     |                                                                                                                             |          |     |  |   |              |       |        |
|-----|-----------------------------------------------------------------------------------------------------------------------------|----------|-----|--|---|--------------|-------|--------|
| S7P | 1-C-(hydroxymethyl)-6-O-phosphono-beta-D-alfrofuranose                                                                      | modified |     |  | D | pyranose     | beta  | ketose |
| S81 | (1R,2R,3S,4R,6S)-4,6-diamino-2,3-dihydroxycyclohexyl 2,6-diamino-2,4,6-trideoxy-4-fluoro-alpha-D-glucopyranoside            | modified |     |  | D | pyranose     | alpha | aldose |
| SA0 | 2-(hydroxymethyl)phenyl beta-D-glucopyranoside                                                                              | modified | BGC |  | D | pyranose     | beta  | aldose |
| SCG | Secologanin                                                                                                                 | modified |     |  | D | pyranose     | beta  | aldose |
| SFJ | (2R,3R,4R,5R,6R)-5-acetamido-2,3-difluoro-4-hydroxy-6-[(1R,2R)-1,2,3-trihydroxypropyl]tetrahydro-2H-pyran-2-carboxylic acid | modified |     |  | D | pyranose     |       | ketose |
| SFU | methyl 1-seleno-alpha-L-fucopyranoside                                                                                      | modified |     |  | L | pyranose     | alpha | aldose |
| SG4 | 3,4-di-O-acetyl-6-O-sulfamoyl-alpha-D-glucopyranose                                                                         | modified | GLC |  | D | pyranose     | alpha | aldose |
| SG5 | 2,3,4-tri-O-propanoyl-6-O-sulfamoyl-alpha-D-glucopyranose                                                                   | modified | GLC |  | D | pyranose     | alpha | aldose |
| SG6 | 4-O-acetyl-6-O-sulfamoyl-alpha-D-galactopyranose                                                                            | modified | GLA |  | D | pyranose     | alpha | aldose |
| SG7 | 3,4-di-O-acetyl-6-O-sulfamoyl-alpha-D-mannopyranose                                                                         | modified | MAN |  | D | pyranose     | alpha | aldose |
| SGA | 3-O-sulfo-beta-D-galactopyranose                                                                                            | modified | GAL |  | D | pyranose     | beta  | aldose |
| SGC | 4-thio-beta-D-glucopyranose                                                                                                 | modified |     |  | D | pyranose     | beta  | aldose |
| SGD | 6-thio-alpha-D-glucopyranose                                                                                                | modified |     |  | D | pyranose     | alpha | aldose |
| SGN | 2-deoxy-6-O-sulfo-2-(sulfoamino)-alpha-D-glucopyranose                                                                      | modified | PA1 |  | D | pyranose     | alpha | aldose |
| SHB | methyl beta-D-galactopyranuronate                                                                                           | modified | GAL |  | D | pyranose     | beta  | aldose |
| SHG | 2-deoxy-2-fluoro-beta-D-glucopyranose                                                                                       | modified |     |  | D | pyranose     | beta  | aldose |
| SID | methyl 9-S-acetyl-5-acetamido-3,5-dideoxy-9-thio-D-glycero-alpha-D-galacto-non-2-ulopyranosidonic acid                      | modified |     |  | D | pyranose     | alpha | ketose |
| SIO | methyl 4,9-di-O-acetyl-5-acetamido-3,5-dideoxy-D-glycero-alpha-D-galacto-non-2-ulopyranosidonic acid                        | modified | SIA |  | D | pyranose     | alpha | ketose |
| SIZ | 2-deoxy-2-[(difluoroacetyl)amino]-beta-D-galactopyranose                                                                    | modified | NGA |  | D | pyranose     | beta  | aldose |
| SLM | (2S,4S,5R,6R)-5-acetamido-2,4-dihydroxy-6-[(1R,2R)-1,2,3-trihydroxypropyl]oxane-2-carboxamide                               | modified |     |  | D | pyranose     | beta  | ketose |
| SN5 | 2-deoxy-2-(ethanethiolamino)-beta-D-glucopyranose                                                                           | modified | GCS |  | D | pyranose     | beta  | aldose |
| SNG | methyl 2-acetamido-2-deoxy-1-seleno-beta-D-glucopyranoside                                                                  | modified |     |  | D | pyranose     | beta  | aldose |
| SOG | octyl 1-thio-beta-D-glucopyranoside                                                                                         | modified |     |  | D | pyranose     | beta  | aldose |
| SR1 | 5-S-methyl-5-thio-alpha-D-ribofuranose                                                                                      | modified |     |  | D | furanose     | alpha | aldose |
| SSG | 1,4-dithio-beta-D-glucopyranose                                                                                             | modified |     |  | D | pyranose     | beta  | aldose |
| STZ | Streptozotocin                                                                                                              | modified | GCS |  | D | pyranose     | beta  | aldose |
| SUS | 2-deoxy-3,6-di-O-sulfo-2-(sulfoamino)-alpha-D-glucopyranose                                                                 | modified | PA1 |  | D | pyranose     | alpha | aldose |
| SZZ | Sinigrin                                                                                                                    | modified |     |  | D | pyranose     | alpha | aldose |
| T68 | N-[(pyridin-2-ylcarbonyl)carbamoyl]-beta-D-glucopyranosylamine                                                              | modified |     |  | D | pyranose     | beta  | aldose |
| TA6 | 6-O-phosphono-beta-D-tagatofuranose                                                                                         | modified |     |  | D | furanose     | beta  | ketose |
| TEU | 1-O-alpha-D-glucopyranosyl-D-fructose                                                                                       | modified | GLC |  | D | pyranose     | alpha | aldose |
| TFU | methyl 1-seleno-beta-L-fucopyranoside                                                                                       | modified |     |  | L | pyranose     | beta  | aldose |
| TGA | 2-sulfanylethyl beta-D-galactopyranoside                                                                                    | modified | GAL |  | D | pyranose     | beta  | aldose |
| TGK | 1-deoxy-beta-L-tagatopyranose                                                                                               | modified |     |  | L | pyranose     | beta  | ketose |
| TGR | 1-deoxy-alpha-D-xylo-hex-3-ulofuranose                                                                                      | modified |     |  | D | furanose     | alpha | aldose |
| TGY | 1-deoxy-alpha-D-tagatopyranose                                                                                              | modified |     |  | D | pyranose     | alpha | ketose |
| TH1 | (1R)-1,5-anhydro-1-(5-methyl-1,3-benzothiazol-2-yl)-D-glucitol                                                              | modified |     |  | D | pyranose     |       | aldose |
| TMR | 2,6-dideoxy-4-S-methyl-4-thio-beta-D-ribo-hexopyranose                                                                      | modified |     |  | D | pyranose     | beta  | aldose |
| TMX | 2-deoxy-2-(trimethylammonio)-beta-D-glucopyranose                                                                           | modified |     |  | D | pyranose     | beta  | aldose |
| TNX | 1,5-anhydro-2-deoxy-2-(ethanethiolamino)-D-arabino-hex-1-enitol                                                             | modified |     |  | D | dihydropyran |       | aldose |
| TOA | 3-ammonio-3-deoxy-alpha-D-glucopyranose                                                                                     | modified |     |  | D | pyranose     | alpha | aldose |

|     |                                                                                                                                              |          |     |  |   |              |       |        |
|-----|----------------------------------------------------------------------------------------------------------------------------------------------|----------|-----|--|---|--------------|-------|--------|
| TOC | 2,6-diammonio-2,3,6-trideoxy-alpha-D-glucopyranose                                                                                           | modified |     |  | D | pyranose     | alpha | aldose |
| TQY | 6-O-octanoyl-alpha-D-glucopyranose                                                                                                           | modified | GLC |  | D | pyranose     | alpha | aldose |
| TRV | 6-O-octanoyl-beta-D-fructofuranose                                                                                                           | modified | FRU |  | D | furanose     | beta  | ketose |
| TS8 | 2,3,4,6-tetra-O-acetyl-1-thio-beta-D-glucopyranose                                                                                           | modified |     |  | D | pyranose     | beta  | aldose |
| TT7 | 4-O-phosphono-beta-D-fructofuranose                                                                                                          | modified | FRU |  | D | furanose     | beta  | ketose |
| TTZ | N-[(3aS,4R,5S,6S,6aS)-4,5,6-trihydroxy-4-(hydroxymethyl)-4,5,6,6a-tetrahydro-3aH-cyclopenta[d][1,3]thiazol-2-yl]-alpha-D-glucopyranosylamine | modified |     |  | D | pyranose     | alpha | aldose |
| TU4 | 3-O-octanoyl-alpha-D-glucopyranose                                                                                                           | modified | GLC |  | D | pyranose     | alpha | aldose |
| TUG | 3,4-di-O-sulfo-alpha-D-altropyranose                                                                                                         | modified | SHD |  | D | pyranose     | alpha | aldose |
| TUJ | 1,2,3,4-tetra-O-sulfo-alpha-D-allopyranose                                                                                                   | modified | AFD |  | D | pyranose     | alpha | aldose |
| TUP | 3-deoxy-3-fluoro-alpha-D-glucopyranose                                                                                                       | modified |     |  | D | pyranose     | alpha | aldose |
| TVD | N-acetyl-2-(acetylamino)-2-deoxy-beta-D-glucopyranosylamine                                                                                  | modified |     |  | D | pyranose     | beta  | aldose |
| TVG | propyl beta-D-galactofuranoside                                                                                                              | modified | GZL |  | D | pyranose     | beta  | aldose |
| TVM | 3-O-[(3-methoxyphenyl)methyl]-beta-D-galactopyranose                                                                                         | modified | GAL |  | D | pyranose     | beta  | aldose |
| TVS | prop-2-en-1-yl 2-(acetylamino)-2-deoxy-beta-D-glucopyranoside                                                                                | modified | NAG |  | D | pyranose     | beta  | aldose |
| TVV | 3-O-prop-2-yn-1-yl-beta-D-galactopyranose                                                                                                    | modified | GAL |  | D | pyranose     | beta  | aldose |
| TVY | (1S)-2-amino-1-phenylethyl alpha-D-mannopyranoside                                                                                           | modified | MAN |  | D | pyranose     | alpha | aldose |
| TW7 | 2-deoxy-2,2-difluoro-alpha-D-arabino-hexopyranosyl fluoride                                                                                  | modified |     |  | D | pyranose     |       | aldose |
| TWA | 2,3,4-tri-O-sulfo-beta-D-altropyranose                                                                                                       | modified |     |  | D | pyranose     | beta  | aldose |
| TWD | 2,3-di-O-sulfo-alpha-L-glucopyranose                                                                                                         | modified |     |  | L | pyranose     | alpha | aldose |
| TWJ | 1-thio-beta-D-talopyranose                                                                                                                   | modified |     |  | D | pyranose     | beta  | aldose |
| TWY | 4-thio-beta-D-xylopyranose                                                                                                                   | modified |     |  | D | pyranose     | beta  | aldose |
| TXB | 4-deoxy-4-thio-alpha-D-xylopyranose                                                                                                          | modified |     |  | D | pyranose     | alpha | aldose |
| U1Y | methyl 6-thio-beta-D-glucopyranoside                                                                                                         | modified |     |  | D | pyranose     | beta  | aldose |
| U2A | methyl 2-thio-beta-D-glucopyranoside                                                                                                         | modified |     |  | D | pyranose     | beta  | aldose |
| U2D | 6-O-decanoyl-alpha-D-glucopyranose                                                                                                           | modified | GLC |  | D | pyranose     | alpha | aldose |
| U8V | 6-O-butanoyl-alpha-D-glucopyranose                                                                                                           | modified | GLC |  | D | pyranose     | alpha | aldose |
| U97 | 2-O-sulfo-beta-L-galactopyranuronic acid                                                                                                     | modified |     |  | L | pyranose     | beta  | aldose |
| U9A | [(2R,3R,4R,5R,6R)-2,4,5-trihydroxy-6-(sulfooxy)tetrahydro-2H-pyran-3-yl]sulfamic acid                                                        | modified |     |  |   | pyranose     |       | aldose |
| U9D | 4-deoxy-2,3,6-tri-O-methyl-alpha-D-xylo-hexopyranose                                                                                         | modified |     |  | D | pyranose     | alpha | aldose |
| U9G | 2,3-di-O-methyl-6-O-sulfo-alpha-D-glucopyranose                                                                                              | modified | GLC |  | D | pyranose     | alpha | aldose |
| U9J | (2R,3R,4S,5S,6R)-6-(dihydroxymethyl)-3,4-dimethoxytetrahydro-2H-pyran-2,5-diol                                                               | modified |     |  | L | pyranose     | alpha | aldose |
| U9M | (2R,3R,4S,5S,6S)-6-(dihydroxymethyl)-3,4-dimethoxytetrahydro-2H-pyran-2,5-diol                                                               | modified |     |  | D | pyranose     | beta  | aldose |
| UAP | 4-deoxy-2-O-sulfo-alpha-L-threo-hex-4-enopyranuronic acid                                                                                    | modified |     |  | L | dihydropyran | alpha | ketose |
| UDC | 2-acetamido-3-O-[(2S,3S)-2-carboxy-3,4-dihydroxybutan-2-yl]-2-deoxy-alpha-D-glucopyranose                                                    | modified | NDG |  | D | pyranose     | alpha | aldose |
| V3M | 2-deoxy-2-fluoro-alpha-D-arabinofuranose                                                                                                     | modified |     |  | D | furanose     | alpha | aldose |
| V3P | 4-iodophenyl 1,4-dithio-beta-D-glucopyranoside                                                                                               | modified |     |  | D | pyranose     | beta  | aldose |
| V71 | (1R,2R,3S,4R,6S)-4,6-diamino-2,3-dihydroxycyclohexyl 2,6-diamino-2,4,6-trideoxy-4-fluoro-alpha-D-galactopyranoside                           | modified |     |  | D | pyranose     | alpha | aldose |
| VG1 | ALPHA-D-GLUCOSE-1-PHOSPHATE-6-VANADATE                                                                                                       | modified | GLC |  | D | pyranose     | alpha | aldose |
| VTB | 7-O-phosphono-alpha-L-galacto-hept-2-ulopyranose                                                                                             | modified |     |  | L | pyranose     | alpha | ketose |
| WIA | methyl 6-thio-beta-D-galactopyranoside                                                                                                       | modified |     |  | D | pyranose     | beta  | aldose |

|         |                                                                                                      |          |     |  |   |          |       |        |
|---------|------------------------------------------------------------------------------------------------------|----------|-----|--|---|----------|-------|--------|
| WUN     | 2-amino-4-O-(4-chlorobenzyl)-2-deoxy-alpha-D-glucopyranose                                           | modified | PA1 |  | D | pyranose | alpha | aldose |
| X1P     | 1-O-phosphono-alpha-D-xylopyranose                                                                   | modified | XYS |  | D | pyranose | alpha | aldose |
| X2F     | 2-deoxy-2-fluoro-alpha-D-xylopyranose                                                                | modified |     |  | D | pyranose | alpha | aldose |
| XDX     | (2R)-2-(alpha-D-glucopyranosyloxy)-3-(phosphonoxy)propanoic acid                                     | modified | GLC |  | D | pyranose | alpha | aldose |
| XGP     | 1-O-phosphono-beta-D-glucopyranose                                                                   | modified | BGC |  | D | pyranose | beta  | aldose |
| XIL     | (3S,4R)-3-hydroxy-2-oxopiperidin-4-yl beta-D-xylopyranoside                                          | modified | XYP |  | D | pyranose | beta  | aldose |
| XM<br>M | 5-bromo-4-chloro-1H-indol-3-yl alpha-D-mannopyranoside                                               | modified | MAN |  | D | pyranose | alpha | aldose |
| XXX     | (1R,2R,3S,4R,6S)-4,6-diamino-2,3-dihydroxycyclohexyl 2,6-diamino-2,6-dideoxy-alpha-D-glucopyranoside | modified |     |  | D | pyranose | alpha | aldose |
| XYF     | 5(R)-fluoro-beta-D-xylopyranose                                                                      | modified |     |  | D | pyranose | beta  | aldose |
| YIO     | 1-thio-beta-D-galactopyranose                                                                        | modified |     |  | D | pyranose | beta  | aldose |
| YKR     | 2-amino-4-O-benzyl-2-deoxy-alpha-D-glucopyranose                                                     | modified | PA1 |  | D | pyranose | alpha | aldose |
| YO5     | (1R)-1,5-anhydro-1-(phosphonomethyl)-D-glucitol                                                      | modified |     |  | D | pyranose |       |        |
| YX0     | [(3E)-3-(1-hydroxyethylidene)-2,3-dihydroisoxazol-5-yl]methyl alpha-L-fucopyranoside                 | modified | FUC |  | L | pyranose | alpha | aldose |
| YX1     | 2-deoxy-2-[[2-hydroxy-1-methylhydrazino]carbonylamino]-beta-D-glucopyranose                          | modified |     |  | D | pyranose | beta  | aldose |
| YYB     | 1,5-anhydro-3-O-methyl-2,6-di-O-sulfo-D-glucitol                                                     | modified |     |  | D | pyranose |       | aldose |
| YYH     | 7-deoxy-L-glycero-alpha-D-manno-heptopyranose                                                        | modified | MAN |  | D | pyranose | alpha | aldose |
| YYJ     | 1,3,4,6-tetra-O-sulfo-beta-D-fructofuranose                                                          | modified | FRU |  | D | furanose | beta  | ketose |
| YZ0     | methyl beta-D-mannopyranoside                                                                        | modified | BMA |  | D | pyranose | beta  | aldose |
| Z15     | (1S)-1,5-anhydro-1-(4-chloro-2,5-dihydroxyphenyl)-D-glucitol                                         | modified |     |  | D | pyranose |       | aldose |
| Z16     | (1S)-1,5-anhydro-1-(3-chloro-2,5-dihydroxyphenyl)-D-glucitol                                         | modified |     |  | D | pyranose |       | aldose |
| Z2T     | (1S)-1,5-anhydro-1-(3-chloro-2-hydroxy-5-methoxyphenyl)-D-glucitol                                   | modified |     |  | D | pyranose |       | aldose |
| Z3K     | (1S)-2,3,6-tri-O-acetyl-1,5-anhydro-1-sulfamoyl-D-glucitol                                           | modified |     |  | D | pyranose | beta  | aldose |
| Z3L     | 2,3,4,6-tetra-O-acetyl-beta-D-galactopyranose                                                        | modified | GAL |  | D | pyranose | beta  | aldose |
| Z3Q     | 2-azidoethyl 2-acetamido-2-deoxy-beta-D-glucopyranoside                                              | modified | NAG |  | D | pyranose | beta  | aldose |
| Z4K     | 2-O-sulfo-alpha-D-glucopyranose                                                                      | modified | GLC |  | D | pyranose | alpha | aldose |
| Z4R     | methyl 3-thio-alpha-D-mannopyranoside                                                                | modified |     |  | D | pyranose | alpha | aldose |
| Z4S     | 1,6-anhydro-N-acetyl-beta-D-glucopyranosamine                                                        | modified |     |  | D | pyranose | beta  | aldose |
| Z4U     | methyl 4-thio-alpha-D-xylopyranoside                                                                 | modified |     |  | D | pyranose | alpha | aldose |
| Z4V     | 4-thio-beta-L-ribopyranose                                                                           | modified |     |  | L | pyranose | beta  | aldose |
| Z4Y     | 6-thio-alpha-D-mannopyranose                                                                         | modified |     |  | D | pyranose | alpha | aldose |
| Z57     | (1S)-1,5-anhydro-1-(4-bromo-2,5-dihydroxyphenyl)-D-glucitol                                          | modified |     |  | D | pyranose |       | aldose |
| Z5L     | methyl 2-thio-alpha-D-mannopyranoside                                                                | modified |     |  | D | pyranose | alpha | aldose |
| Z61     | 2-deoxy-alpha-D-arabino-hexopyranose                                                                 | modified |     |  | D | pyranose | alpha | aldose |
| Z6W     | (5R)-5-[(2R)-2-hydroxynonyl]-beta-D-xylulofuranose                                                   | modified |     |  | D | furanose | beta  | ketose |
| Z9D     | 4-deoxy-beta-D-xylo-hexopyranose                                                                     | modified |     |  | D | pyranose | beta  | aldose |
| Z9E     | 1-thio-alpha-D-glucopyranose                                                                         | modified |     |  | D | pyranose | alpha | aldose |
| Z9H     | 3,4-di-O-methyl-2,6-di-O-sulfo-alpha-D-glucopyranose                                                 | modified | GLC |  | D | pyranose | alpha | aldose |
| Z9K     | 3-O-methyl-2-O-sulfo-alpha-L-idopyranuronic acid                                                     | modified | ZOF |  | L | pyranose | alpha | aldose |
| Z9L     | methyl 2,3,6-tri-O-sulfo-alpha-D-glucopyranoside                                                     | modified | GLC |  | D | pyranose | alpha | aldose |
| Z9M     | 2-amino-2-deoxy-4-O-phosphono-beta-D-glucopyranose                                                   | modified | GCS |  | D | pyranose | beta  | aldose |
| ZB0     | 2,3-di-O-methyl-alpha-D-glucopyranose                                                                | modified | GLC |  | D | pyranose | alpha | aldose |



|     |                                                                                                         |          |     |  |   |              |       |        |
|-----|---------------------------------------------------------------------------------------------------------|----------|-----|--|---|--------------|-------|--------|
| ZB1 | 3-O-methyl-alpha-D-glucopyranose                                                                        | modified | GLC |  | D | pyranose     | alpha | aldose |
| ZB2 | 2-O-methyl-alpha-D-glucopyranose                                                                        | modified | GLC |  | D | pyranose     | alpha | aldose |
| ZB3 | 2,6-di-O-methyl-alpha-D-glucopyranose                                                                   | modified | GLC |  | D | pyranose     | alpha | aldose |
| ZCZ | 4,6-dideoxy-4-[[{(2R)-2,4-dihydroxybutanoyl]amino}-2-O-methyl-alpha-D-mannopyranose                     | modified |     |  | D | pyranose     | alpha | aldose |
| ZD0 | methyl 4,6-dideoxy-4-[[{(2R)-2,4-dihydroxybutanoyl]amino}-alpha-D-mannopyranoside                       | modified |     |  | D | pyranose     | alpha | aldose |
| ZDC | 3,7-anhydro-2,8-dideoxy-L-glycero-D-gluco-octonic acid                                                  | modified |     |  | D | pyranose     |       |        |
| ZDO | methyl 2-deoxy-6-O-sulfo-2-(sulfoamino)-alpha-D-glucopyranoside                                         | modified | PA1 |  | D | pyranose     | alpha | aldose |
| ZEL | methyl beta-D-altropyranoside                                                                           | modified |     |  | D | pyranose     | beta  | aldose |
| ZGE | 5-acetamido-2,6-anhydro-4-carbamimidamido-3,4,5-trideoxy-3-fluoro-D-glycero-D-galacto-non-2-enonic acid | modified |     |  | D | dihydropyran |       | ketose |
| ZMR | ZANAMIVIR                                                                                               | modified |     |  | D | dihydropyran |       | ketose |

## Supplementary Table SII: Glycosylation Types in the PDB

| Type            | Site | Monosaccharide Symbols  | CCD ID |
|-----------------|------|-------------------------|--------|
| N-Glycosylation | ASN  | b-D-GlcpNAc             | NAG    |
|                 | ASN  | b-D-Glcp                | BGC    |
|                 | ARG  | b-D-GlcpNAc             | NAG    |
| O-Glycosylation | SER  | a-D-GalpNAc             | A2G    |
|                 | SER  | b-D-6-deoxy-GlcpNAc4NAc | B6D    |
|                 | SER  | b-D-Glcp                | BGC    |
|                 | SER  | a-L-Fucp                | FUC    |
|                 | SER  | a-D-Galp                | GLA    |
|                 | SER  | a-D-Glcp                | GLC    |
|                 | SER  | a-D-Manp                | MAN    |
|                 | SER  | b-D-GlcpNAc             | NAG    |
|                 | THR  | a-D-GalpNAc             | A2G    |
|                 | THR  | a-L-Fucp                | FUC    |
|                 | THR  | a-D-Glcp                | GLC    |
|                 | THR  | a-D-Manp                | MAN    |
|                 | THR  | b-D-GlcpNAc             | NAG    |
|                 | THR  | a-D-GlcpNAc             | NDG    |
|                 | THR  | b-D-GalpNAc             | NGA    |
|                 | TYR  | b-D-Glcp                | BGC    |
|                 | TYR  | a-D-Glcp                | GLC    |
|                 | TYR  | a-D-GlcpNAc             | NDG    |
| S-Glycosylation | CYS  | a-D-GalpNAc             | A2G    |
|                 | CYS  | b-D-Glcp                | BGC    |
|                 | CYS  | b-D-GlcpNAc             | NAG    |
| C-Mannosylation | TRP  | a-D-Manp                | MAN    |

## Supplementary Table SIII: Blood Group Antigens in BIRD

| BIRD ID    | Molecule Name                                | Glycam Condensed Sequence                                | PDB ID |
|------------|----------------------------------------------|----------------------------------------------------------|--------|
| PRD_900129 | Lewis A antigen, beta anomer                 | DGalpb1-3[LFucpa1-4]DGlcNACb1-ROH                        | 3UET   |
| PRD_900130 | Lewis A antigen, alpha anomer                | DGalpb1-3[LFucpa1-4]DGlcNAca1-ROH                        | 4RM0   |
| PRD_900119 | Lewis X antigen, beta anomer                 | LFucpa1-3[DGalpb1-4]DGlcNACb1-ROH                        | 2OX9   |
| PRD_900120 | Lewis X antigen, alpha anomer                | LFucpa1-3[DGalpb1-4]DGlcNAca1-ROH                        | 1SL6   |
| PRD_900121 | Sialyl-Lewis X antigen, beta anomer          | DNeup5Aca2-3DGalpb1-4[LFucpa1-3]DGlcNACb1-ROH            | 2R61   |
| PRD_900122 | Sialyl-Lewis X antigen, alpha anomer         | DNeup5Aca2-3DGalpb1-4[LFucpa1-3]DGlcNAca1-ROH            | 2RDG   |
| PRD_900123 | Lewis B antigen, beta anomer                 | LFucpa1-2DGalpb1-3[LFucpa1-4]DGlcNACb1-ROH               | 4GWJ   |
| PRD_900085 | Lewis B antigen, alpha anomer                | LFucpa1-2DGalpb1-3[LFucpa1-4]DGlcNAca1-ROH               | 3LEK   |
| PRD_900054 | Lewis Y antigen, beta anomer                 | LFucpa1-2DGalpb1-4[LFucpa1-3]DGlcNACb1-ROH               | 4GWI   |
| PRD_900124 | Lewis Y antigen, alpha anomer                | LFucpa1-2DGalpb1-4[LFucpa1-3]DGlcNAca1-ROH               | 1S3K   |
| PRD_900049 | H type 1 antigen, beta anomer                | LFucpa1-2DGalpb1-3DGlcNACb1-ROH                          | 1Z15   |
| PRD_900036 | H type 2 antigen, beta anomer                | LFucpa1-2DGalpb1-4DGlcNACb1-ROH                          | 1Z13   |
| PRD_900125 | H type 2 antigen, alpha anomer               | LFucpa1-2DGalpb1-4DGlcNAca1-ROH                          | 217M   |
| PRD_900126 | Blood group A Lewis B antigen, beta anomer   | LFucpa1-2[DGalpNaca1-3]DGalpb1-3[LFucpa1-4]DGlcNACb1-ROH | 5F7N   |
| PRD_900127 | Blood group A Lewis Y antigen, beta anomer   | LFucpa1-2[DGalpNaca1-3]DGalpb1-4[LFucpa1-3]DGlcNACb1-ROH | 2WMK   |
| PRD_900128 | Blood group A Lewis Y antigen, alpha anomer  | LFucpa1-2[DGalpNaca1-3]DGalpb1-4[LFucpa1-3]DGlcNAca1-ROH | 5ELE   |
| PRD_900131 | Blood group A H type 1 antigen, beta anomer  | LFucpa1-2[DGalpNaca1-3]DGalpb1-3DGlcNACb1-ROH            | 3ASP   |
| PRD_900132 | Blood group A H type 2 antigen, beta anomer  | LFucpa1-2[DGalpNaca1-3]DGalpb1-4DGlcNACb1-ROH            | 4DS0   |
| PRD_900133 | Blood group A H type 2 antigen, alpha anomer | LFucpa1-2[DGalpNaca1-3]DGalpb1-4DGlcNAca1-ROH            | 5XFD   |
| PRD_900134 | Blood group B H type 2 antigen, beta anomer  | LFucpa1-2[DGalpa1-3]DGalpb1-4DGlcNACb1-ROH               | 2YGM   |

Each row records BIRD ID, the name of the blood group antigen, the Glycam Condensed Sequence and the PDB ID of representing entry. These blood group antigens are terminal patterned groups in complex with the target protein. Since the free reducing end hemiacetal may adopt either alpha or beta anomeric form, there are usually pairs of both, and the free hemiacetal group is represented by '1-ROH' in the Glycam Condensed Sequence.

## Supplementary Table SIV: Commonly Observed Oligosaccharides in the PDB

| #PDB Entries | Composition by CCD ID | Type of Descriptor        | Descriptor                                                                                                                                                                  |
|--------------|-----------------------|---------------------------|-----------------------------------------------------------------------------------------------------------------------------------------------------------------------------|
| 3124         | NAG,NAG               | PDB Systematic Name       | 2-acetamido-2-deoxy-beta-D-glucopyranose-(1-4)-2-acetamido-2-deoxy-beta-D-glucopyranose                                                                                     |
|              |                       | Glycam Condensed Sequence | DGlcNac1-4DGlcNac1-                                                                                                                                                         |
|              |                       | LINUXS                    | [ ]{[(4+1)][b-D-GlcNac]{[(4+1)][b-D-GlcNac]{}}}                                                                                                                             |
|              |                       | WURCS                     | WURCS=2.0/1,2,1/[a2122h-1b_1-5_2*NCC/3=O]/1-1/a4-b1                                                                                                                         |
| 1056         | NAG,NAG,BMA           | PDB Systematic Name       | beta-D-mannopyranose-(1-4)-2-acetamido-2-deoxy-beta-D-glucopyranose-(1-4)-2-acetamido-2-deoxy-beta-D-glucopyranose                                                          |
|              |                       | Glycam Condensed Sequence | DManpb1-4DGlcNac1-4DGlcNac1-                                                                                                                                                |
|              |                       | LINUXS                    | [ ]{[(4+1)][b-D-GlcNac]{[(4+1)][b-D-GlcNac]{[(4+1)][b-D-Manp]{}}}]                                                                                                          |
|              |                       | WURCS                     | WURCS=2.0/2,3,2/[a2122h-1b_1-5_2*NCC/3=O][a1122h-1b_1-5]/1-1-2/a4-b1_b4-c1                                                                                                  |
| 431          | NAG,NAG,BMA,MAN,MAN   | PDB Systematic Name       | alpha-D-mannopyranose-(1-3)-[alpha-D-mannopyranose-(1-6)]beta-D-mannopyranose-(1-4)-2-acetamido-2-deoxy-beta-D-glucopyranose-(1-4)-2-acetamido-2-deoxy-beta-D-glucopyranose |
|              |                       | Glycam Condensed Sequence | DManpa1-3[DManpa1-6]DManpb1-4DGlcNac1-4DGlcNac1-                                                                                                                            |
|              |                       | LINUXS                    | [ ]{[(4+1)][b-D-GlcNac]{[(4+1)][b-D-GlcNac]{[(4+1)][b-D-Manp]{[(3+1)][a-D-Manp]{[(6+1)][a-D-Manp]{}}}]}}}                                                                   |
|              |                       | WURCS                     | WURCS=2.0/3,5,4/[a2122h-1b_1-5_2*NCC/3=O][a1122h-1b_1-5][a1122h-1a_1-5]/1-1-2-3/a4-b1_b4-c1_c3-d1_c6-e1                                                                     |
| 425          | NAG,NAG,BMA,MAN       | PDB Systematic Name       | alpha-D-mannopyranose-(1-3)-beta-D-mannopyranose-(1-4)-2-acetamido-2-deoxy-beta-D-glucopyranose-(1-4)-2-acetamido-2-deoxy-beta-D-glucopyranose                              |
|              |                       | Glycam Condensed Sequence | DManpa1-3DManpb1-4DGlcNac1-4DGlcNac1-                                                                                                                                       |
|              |                       | LINUXS                    | [ ]{[(4+1)][b-D-GlcNac]{[(4+1)][b-D-GlcNac]{[(4+1)][b-D-Manp]{[(3+1)][a-D-Manp]{}}}]}}}                                                                                     |
|              |                       | WURCS                     | WURCS=2.0/3,4,3/[a2122h-1b_1-5_2*NCC/3=O][a1122h-1b_1-5][a1122h-1a_1-5]/1-1-2-3/a4-b1_b4-c1_c3-d1                                                                           |
| 356          | NAG,NAG,FUC           | PDB Systematic Name       | 2-acetamido-2-deoxy-beta-D-glucopyranose-(1-4)-[alpha-L-fucopyranose-(1-6)]2-acetamido-2-deoxy-beta-D-glucopyranose                                                         |
|              |                       | Glycam Condensed Sequence | DGlcNac1-4[LFucpa1-6]DGlcNac1-                                                                                                                                              |
|              |                       | LINUXS                    | [ ]{[(4+1)][b-D-GlcNac]{[(4+1)][b-D-GlcNac]{[(6+1)][a-L-Fucp]{}}}]                                                                                                          |
|              |                       | WURCS                     | WURCS=2.0/2,3,2/[a2122h-1b_1-5_2*NCC/3=O][a1221m-1a_1-5]/1-1-2/a4-b1_a6-c1                                                                                                  |
| 356          | GLC,GLC               | PDB Systematic Name       | alpha-D-glucopyranose-(1-4)-alpha-D-glucopyranose                                                                                                                           |
|              |                       | Glycam Condensed Sequence | DGlcpa1-4DGlcpa1-ROH                                                                                                                                                        |
|              |                       | LINUXS                    | [ ]{[a-D-Glc]{[(4+1)][a-D-Glc]{}}}                                                                                                                                          |
|              |                       | WURCS                     | WURCS=2.0/1,2,1/[a2122h-1a_1-5]/1-1/a4-b1                                                                                                                                   |
| 264          | GLC,FRU               | PDB Systematic Name       | beta-D-fructofuranose-(2-1)-alpha-D-glucopyranose                                                                                                                           |
|              |                       | Glycam Condensed Sequence | DFrufb2-1DGlcpa                                                                                                                                                             |
|              |                       | LINUXS                    | [ ]{[b-D-Fruf]{[(2+1)][a-D-Glc]{}}}                                                                                                                                         |
|              |                       | WURCS                     | WURCS=2.0/2,2,1/[ha122h-2b_2-5][a2122h-1a_1-5]/1-2/a2-b1                                                                                                                    |
| 233          | NAG,FUC               | PDB Systematic Name       | alpha-L-fucopyranose-(1-6)-2-acetamido-2-deoxy-beta-D-glucopyranose                                                                                                         |
|              |                       | Glycam Condensed Sequence | LFucpa1-6DGlcNac1-                                                                                                                                                          |
|              |                       | LINUXS                    | [ ]{[(4+1)][b-D-GlcNac]{[(6+1)][a-L-Fucp]{}}}]                                                                                                                              |
|              |                       | WURCS                     | WURCS=2.0/2,2,1/[a2122h-1b_1-5_2*NCC/3=O][a1221m-1a_1-5]/1-2/a6-b1                                                                                                          |
| 232          | NAG,NAG,MAN           | PDB Systematic Name       | alpha-D-mannopyranose-(1-4)-2-acetamido-2-deoxy-beta-D-glucopyranose-(1-4)-2-acetamido-2-deoxy-beta-D-glucopyranose                                                         |
|              |                       | Glycam Condensed Sequence | DManpa1-4DGlcNac1-4DGlcNac1-                                                                                                                                                |
|              |                       | LINUXS                    | [ ]{[(4+1)][b-D-GlcNac]{[(4+1)][b-D-GlcNac]{[(4+1)][b-D-Manp]{}}}]                                                                                                          |
|              |                       | WURCS                     | WURCS=2.0/2,3,2/[a2122h-1b_1-5_2*NCC/3=O][a1122h-1a_1-5]/1-1-2/a4-b1_b4-c1                                                                                                  |

|     |                     |                           |                                                                                                                                                |
|-----|---------------------|---------------------------|------------------------------------------------------------------------------------------------------------------------------------------------|
| 171 | NAG,NAG,BMA,<br>MAN | PDB Systematic Name       | alpha-D-mannopyranose-(1-6)-beta-D-mannopyranose-(1-4)-2-acetamido-2-deoxy-beta-D-glucopyranose-(1-4)-2-acetamido-2-deoxy-beta-D-glucopyranose |
|     |                     | Glycam Condensed Sequence | DManpa1-6DManpb1-4DGlcNACb1-4DGlcNACb1-                                                                                                        |
|     |                     | LINUXS                    | [ ]{[(4+1)][b-D-GlcNAC]{[(4+1)][b-D-GlcNAC]{[(4+1)][b-D-Manp]{[(6+1)][a-D-Manp]{}}}}}                                                          |
|     |                     | WURCS                     | WURCS=2.0/3,4,3/[a2122h-1b_1-5_2*NCC/3=O][a1122h-1b_1-5][a1122h-1a_1-5]/1-1-2-3/a4-b1_b4-c1_c6-d1                                              |
| 129 | BGC,GAL             | PDB Systematic Name       | beta-D-galactopyranose-(1-4)-beta-D-glucopyranose                                                                                              |
|     |                     | Glycam Condensed Sequence | DGalpb1-4DGlcpb1-ROH                                                                                                                           |
|     |                     | LINUXS                    | [ ]{[b-D-Glc]{[(4+1)][b-D-Galp]{}}                                                                                                             |
|     |                     | WURCS                     | WURCS=2.0/2,2,1/[a2122h-1b_1-5][a2112h-1b_1-5]/1-2/a4-b1                                                                                       |
| 122 | NAG,NAG,BMA,F<br>UC | PDB Systematic Name       | beta-D-mannopyranose-(1-4)-2-acetamido-2-deoxy-beta-D-glucopyranose-(1-4)-[alpha-L-fucopyranose-(1-6)]2-acetamido-2-deoxy-beta-D-glucopyranose |
|     |                     | Glycam Condensed Sequence | DManpb1-4DGlcNACb1-4[LFucpa1-6]DGlcNACb1-                                                                                                      |
|     |                     | LINUXS                    | [ ]{[(4+1)][b-D-GlcNAC]{[(4+1)][b-D-GlcNAC]{[(4+1)][b-D-Manp]{}}}{[(6+1)][a-L-Fucp]{}}                                                         |
|     |                     | WURCS                     | WURCS=2.0/3,4,3/[a2122h-1b_1-5_2*NCC/3=O][a1122h-1b_1-5][a1221m-1a_1-5]/1-1-2-3/a4-b1_a6-d1_b4-c1                                              |
| 116 | NAG,NAG,NAG         | PDB Systematic Name       | 2-acetamido-2-deoxy-beta-D-glucopyranose-(1-4)-2-acetamido-2-deoxy-beta-D-glucopyranose-(1-4)-2-acetamido-2-deoxy-beta-D-glucopyranose         |
|     |                     | Glycam Condensed Sequence | DGlcNACb1-4DGlcNACb1-4DGlcNACb1-ROH                                                                                                            |
|     |                     | LINUXS                    | [ ]{[b-D-GlcNAC]{[(4+1)][b-D-GlcNAC]{[(4+1)][b-D-GlcNAC]{}}                                                                                    |
|     |                     | WURCS                     | WURCS=2.0/1,3,2/[a2122h-1b_1-5_2*NCC/3=O]/1-1-1/a4-b1_b4-c1                                                                                    |
| 111 | BGC,BGC             | PDB Systematic Name       | beta-D-glucopyranose-(1-4)-beta-D-glucopyranose                                                                                                |
|     |                     | Glycam Condensed Sequence | DGlcpb1-4DGlcpb1-ROH                                                                                                                           |
|     |                     | LINUXS                    | [ ]{[b-D-Glc]{[(4+1)][b-D-Glc]{}}                                                                                                              |
|     |                     | WURCS                     | WURCS=2.0/1,2,1/[a2122h-1b_1-5]/1-1/a4-b1                                                                                                      |



## Supplementary Table SV: PDB Examples of Glycan Sequences at the Different Glycosylation Sites

| Index | Site | Symbol of Monosaccharide connecting to protein | CCD ID | PDB Example | Observed pattern                                                                     |
|-------|------|------------------------------------------------|--------|-------------|--------------------------------------------------------------------------------------|
| N1    | ASN  | b-D-GlcpNAc                                    | NAG    | 1INX        | 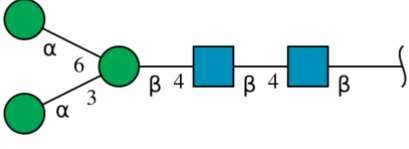   |
| N2    | ASN  | b-D-GlcpNAc                                    | NAG    | 5ACO        |    |
| N3    | ASN  | b-D-GlcpNAc                                    | NAG    | 6WPS        |   |
| N4    | ASN  | b-D-GlcpNAc                                    | NAG    | 5T3X        |  |
| N5    | ASN  | b-D-GlcpNAc                                    | NAG    | 1BCR        |  |

|    |     |                         |     |      |  |
|----|-----|-------------------------|-----|------|--|
| N6 | ASN | b-D-Glcp                | BGC | 5TIP |  |
| O1 | SER | a-D-GalpNac             | A2G | 5KDU |  |
| O2 | SER | a-D-GalpNac             | A2G | 4B1Q |  |
| O3 | SER | b-D-6-deoxy-GlcpNac4NAc | B6D | 5VXX |  |



|    |     |             |     |      |  |
|----|-----|-------------|-----|------|--|
| O4 | SER | b-D-Glcp    | BGC | 5VYG |  |
| O5 | SER | a-L-Fucp    | FUC | 6RUS |  |
| O6 | SER | a-D-Manp    | MAN | 1HMU |  |
| O7 | SER | b-D-GlcpNAc | NAG | 1AY2 |  |
| O8 | THR | a-D-GalpNAc | A2G | 6ROX |  |
| O9 | THR | a-L-Fucp    | FUC | 6RUR |  |

|     |     |                     |     |      |  |
|-----|-----|---------------------|-----|------|--|
| O10 | THR | $\alpha$ -D-Manp    | MAN | 2FUQ |  |
| O11 | THR | $\beta$ -D-GlcpNAc  | NAG | 4DUR |  |
| O12 | THR | $\alpha$ -D-GlcpNAc | NDG | 1QDD |  |
| O13 | THR | $\beta$ -D-GalpNAc  | NGA | 1G15 |  |
| O14 | TYR | $\beta$ -D-Glcp     | BGC | 5V2J |  |
| O15 | TYR | $\alpha$ -D-Glcp    | GLC | 3U2V |  |

The examples selected are relatively complete glycan sequences for the relevant glycosylation sites, confirmed by either the publication of the structures or the supporting experimental data. Most glycosylation glycans in the PDB archive are fragments of these examples, and majority of the glycosylation sites have only a monosaccharide modeled. N1-N6 are examples of N-Glycosylation, and O1-O15 are examples of O-Glycosylation. N1-N5 all have  $\beta$ -D-GlcpNAc (NAG) connected to ASN residue but have sequences of different types and lengths: N1 is the common 5-monomer N-glycan core; N2 is the near-complete oligomannose-type N-glycan; N3 is the commonly 1-6 fucosylated N-glycan core; N4 is the complex-type N-glycan; N5 has 1-3 fucosylation. Most of the N-glycans in the PDB entries are fragments of N1-N5. O1 and O2 both have  $\alpha$ -D-GalpNAc (A2G) connected to SER residue.

## Appendix I: Example of Remediated CCD definition of NAG

# Updates from PDB carbohydrate remediation are highlighted in yellow.

```
#
data_NAG
#
_chem_comp.id                NAG
_chem_comp.name              2-acetamido-2-deoxy-beta-D-glucopyranose
_chem_comp.type              "D-saccharide, beta linking"
_chem_comp.pdbx_type         ATOMS
_chem_comp.formula           "C8 H15 N O6"
_chem_comp.mon_nstd_parent_comp_id ?
_chem_comp.pdbx_formal_charge 0
_chem_comp.pdbx_initial_date 1999-07-08
_chem_comp.pdbx_modified_date 2020-07-17
_chem_comp.pdbx_ambiguous_flag N
_chem_comp.pdbx_release_status REL
_chem_comp.pdbx_replaced_by   ?
_chem_comp.pdbx_replaces     ?
_chem_comp.formula_weight     221.208
_chem_comp.one_letter_code    ?
_chem_comp.three_letter_code  NAG
_chem_comp.pdbx_model_coordinates_details ?
_chem_comp.pdbx_model_coordinates_missing_flag N
_chem_comp.pdbx_ideal_coordinates_details Corina
_chem_comp.pdbx_ideal_coordinates_missing_flag N
_chem_comp.pdbx_model_coordinates_db_code 8PCH
_chem_comp.pdbx_subcomponent_list ?
_chem_comp.pdbx_processing_site RCSB
# #
loop_
  pdbx_chem_comp_synonyms.ordinal
  pdbx_chem_comp_synonyms.comp_id
  pdbx_chem_comp_synonyms.name
  pdbx_chem_comp_synonyms.provenance
  pdbx_chem_comp_synonyms.type
1  NAG  N-acetyl-beta-D-glucosamine      PDB  ?
2  NAG  2-acetamido-2-deoxy-beta-D-glucose  PDB  ?
3  NAG  2-acetamido-2-deoxy-D-glucose        PDB  ?
4  NAG  2-acetamido-2-deoxy-glucose          PDB  ?
5  NAG  N-ACETYL-D-GLUCOSAMINE               PDB  ?
# #
loop_
_chem_comp_atom.comp_id
_chem_comp_atom.atom_id
_chem_comp_atom.alt_atom_id
_chem_comp_atom.type_symbol
_chem_comp_atom.charge
_chem_comp_atom.pdbx_align
_chem_comp_atom.pdbx_aromatic_flag
_chem_comp_atom.pdbx_leaving_atom_flag
_chem_comp_atom.pdbx_stereo_config
_chem_comp_atom.model_Cartn_x
_chem_comp_atom.model_Cartn_y
_chem_comp_atom.model_Cartn_z
_chem_comp_atom.pdbx_model_Cartn_x_ideal
_chem_comp_atom.pdbx_model_Cartn_y_ideal
```

|    | <u>_chem_comp_atom.pdbx_model_Cartn_z_ideal</u> |     |     |   |   |   |   |   |   |       |        |        |        |        |        |     |     |
|----|-------------------------------------------------|-----|-----|---|---|---|---|---|---|-------|--------|--------|--------|--------|--------|-----|-----|
|    | <u>_chem_comp_atom.pdbx_component_atom_id</u>   |     |     |   |   |   |   |   |   |       |        |        |        |        |        |     |     |
|    | <u>_chem_comp_atom.pdbx_component_comp_id</u>   |     |     |   |   |   |   |   |   |       |        |        |        |        |        |     |     |
|    | <u>_chem_comp_atom.pdbx_ordinal</u>             |     |     |   |   |   |   |   |   |       |        |        |        |        |        |     |     |
| 1  | NAG                                             | C1  | C1  | C | 0 | 1 | N | N | R | 7.396 | 28.163 | 26.662 | 0.185  | 1.082  | -0.421 | C1  | NAG |
| 2  | NAG                                             | C2  | C2  | C | 0 | 1 | N | N | R | 6.973 | 29.233 | 27.644 | 0.790  | -0.220 | 0.112  | C2  | NAG |
| 3  | NAG                                             | C3  | C3  | C | 0 | 1 | N | N | R | 7.667 | 29.055 | 29.000 | -0.124 | -1.390 | -0.265 | C3  | NAG |
| 4  | NAG                                             | C4  | C4  | C | 0 | 1 | N | N | S | 7.573 | 27.588 | 29.490 | -1.526 | -1.129 | 0.294  | C4  | NAG |
| 5  | NAG                                             | C5  | C5  | C | 0 | 1 | N | N | R | 7.902 | 26.592 | 28.373 | -2.042 | 0.207  | -0.246 | C5  | NAG |
| 6  | NAG                                             | C6  | C6  | C | 0 | 1 | N | N | N | 7.599 | 25.173 | 28.797 | -3.417 | 0.504  | 0.355  | C6  | NAG |
| 7  | NAG                                             | C7  | C7  | C | 0 | 1 | N | N | N | 6.291 | 31.299 | 26.595 | 3.197  | 0.157  | 0.076  | C7  | NAG |
| 8  | NAG                                             | C8  | C8  | C | 0 | 1 | N | N | N | 6.684 | 32.649 | 26.036 | 4.559  | -0.052 | -0.533 | C8  | NAG |
| 9  | NAG                                             | N2  | N2  | N | 0 | 1 | N | N | N | 7.268 | 30.545 | 27.089 | 2.114  | -0.422 | -0.480 | N2  | NAG |
| 10 | NAG                                             | O1  | O1  | O | 0 | 1 | N | Y | N | 6.676 | 28.363 | 25.419 | 1.003  | 2.185  | -0.024 | O1  | NAG |
| 11 | NAG                                             | O3  | O3  | O | 0 | 1 | N | N | N | 7.038 | 29.909 | 29.947 | 0.395  | -2.600 | 0.291  | O3  | NAG |
| 12 | NAG                                             | O4  | O4  | O | 0 | 1 | N | N | N | 8.494 | 27.358 | 30.574 | -2.405 | -2.180 | -0.114 | O4  | NAG |
| 13 | NAG                                             | O5  | O5  | O | 0 | 1 | N | N | N | 7.104 | 26.875 | 27.206 | -1.130 | 1.248  | 0.113  | O5  | NAG |
| 14 | NAG                                             | O6  | O6  | O | 0 | 1 | N | N | N | 6.232 | 25.040 | 29.165 | -3.949 | 1.691  | -0.236 | O6  | NAG |
| 15 | NAG                                             | O7  | O7  | O | 0 | 1 | N | N | N | 5.114 | 30.936 | 26.562 | 3.074  | 0.845  | 1.067  | O7  | NAG |
| 16 | NAG                                             | H1  | H1  | H | 0 | 1 | N | N | N | 8.477 | 28.257 | 26.481 | 0.133  | 1.040  | -1.509 | H1  | NAG |
| 17 | NAG                                             | H2  | H2  | H | 0 | 1 | N | N | N | 5.888 | 29.146 | 27.803 | 0.879  | -0.163 | 1.197  | H2  | NAG |
| 18 | NAG                                             | H3  | H3  | H | 0 | 1 | N | N | N | 8.729 | 29.321 | 28.892 | -0.174 | -1.478 | -1.350 | H3  | NAG |
| 19 | NAG                                             | H4  | H4  | H | 0 | 1 | N | N | N | 6.544 | 27.403 | 29.831 | -1.483 | -1.091 | 1.382  | H4  | NAG |
| 20 | NAG                                             | H5  | H5  | H | 0 | 1 | N | N | N | 8.971 | 26.674 | 28.128 | -2.123 | 0.154  | -1.332 | H5  | NAG |
| 21 | NAG                                             | H61 | H61 | H | 0 | 1 | N | N | N | 7.816 | 24.492 | 27.961 | -4.088 | -0.333 | 0.157  | H61 | NAG |
| 22 | NAG                                             | H62 | H62 | H | 0 | 1 | N | N | N | 8.232 | 24.910 | 29.657 | -3.320 | 0.645  | 1.431  | H62 | NAG |
| 23 | NAG                                             | H81 | H81 | H | 0 | 1 | N | N | N | 5.791 | 33.159 | 25.646 | 4.560  | 0.320  | -1.558 | H81 | NAG |
| 24 | NAG                                             | H82 | H82 | H | 0 | 1 | N | N | N | 7.136 | 33.258 | 26.833 | 5.305  | 0.490  | 0.050  | H82 | NAG |
| 25 | NAG                                             | H83 | H83 | H | 0 | 1 | N | N | N | 7.411 | 32.511 | 25.222 | 4.799  | -1.115 | -0.532 | H83 | NAG |
| 26 | NAG                                             | HN2 | HN2 | H | 0 | 1 | N | N | N | 8.210 | 30.881 | 27.079 | 2.212  | -0.973 | -1.273 | HN2 | NAG |
| 27 | NAG                                             | HO1 | HO1 | H | 0 | 1 | N | Y | N | 6.933 | 27.696 | 24.793 | 0.679  | 3.044  | -0.328 | HO1 | NAG |

|     |     |     |   |   |   |   |   |   |       |        |        |        |        |       |     |     |
|-----|-----|-----|---|---|---|---|---|---|-------|--------|--------|--------|--------|-------|-----|-----|
| NAG | HO3 | HO3 | H | 0 | 1 | N | Y | N | 7.459 | 29.809 | 30.793 | -0.135 | -3.384 | 0.091 | HO3 | NAG |
| 28  |     |     |   |   |   |   |   |   |       |        |        |        |        |       |     |     |
| NAG | HO4 | HO4 | H | 0 | 1 | N | Y | N | 8.425 | 26.456 | 30.863 | -3.312 | -2.079 | 0.206 | HO4 | NAG |
| 29  |     |     |   |   |   |   |   |   |       |        |        |        |        |       |     |     |
| NAG | HO6 | HO6 | H | 0 | 1 | N | Y | N | 6.060 | 24.143 | 29.428 | -4.822 | 1.940  | 0.099 | HO6 | NAG |
| 30  |     |     |   |   |   |   |   |   |       |        |        |        |        |       |     |     |

# #

loop\_

\_chem\_comp\_bond.comp\_id  
\_chem\_comp\_bond.atom\_id\_1  
\_chem\_comp\_bond.atom\_id\_2  
\_chem\_comp\_bond.value\_order  
\_chem\_comp\_bond.pdbx\_aromatic\_flag  
\_chem\_comp\_bond.pdbx\_stereo\_config  
\_chem\_comp\_bond.pdbx\_ordinal

|     |    |     |      |   |   |    |
|-----|----|-----|------|---|---|----|
| NAG | C1 | C2  | SING | N | N | 1  |
| NAG | C1 | O1  | SING | N | N | 2  |
| NAG | C1 | O5  | SING | N | N | 3  |
| NAG | C1 | H1  | SING | N | N | 4  |
| NAG | C2 | C3  | SING | N | N | 5  |
| NAG | C2 | N2  | SING | N | N | 6  |
| NAG | C2 | H2  | SING | N | N | 7  |
| NAG | C3 | C4  | SING | N | N | 8  |
| NAG | C3 | O3  | SING | N | N | 9  |
| NAG | C3 | H3  | SING | N | N | 10 |
| NAG | C4 | C5  | SING | N | N | 11 |
| NAG | C4 | O4  | SING | N | N | 12 |
| NAG | C4 | H4  | SING | N | N | 13 |
| NAG | C5 | C6  | SING | N | N | 14 |
| NAG | C5 | O5  | SING | N | N | 15 |
| NAG | C5 | H5  | SING | N | N | 16 |
| NAG | C6 | O6  | SING | N | N | 17 |
| NAG | C6 | H61 | SING | N | N | 18 |
| NAG | C6 | H62 | SING | N | N | 19 |
| NAG | C7 | C8  | SING | N | N | 20 |
| NAG | C7 | N2  | SING | N | N | 21 |
| NAG | C7 | O7  | DOUB | N | N | 22 |
| NAG | C8 | H81 | SING | N | N | 23 |
| NAG | C8 | H82 | SING | N | N | 24 |
| NAG | C8 | H83 | SING | N | N | 25 |
| NAG | N2 | HN2 | SING | N | N | 26 |
| NAG | O1 | HO1 | SING | N | N | 27 |
| NAG | O3 | HO3 | SING | N | N | 28 |
| NAG | O4 | HO4 | SING | N | N | 29 |
| NAG | O6 | HO6 | SING | N | N | 30 |

# #

loop\_

\_pdbx\_chem\_comp\_descriptor.comp\_id  
\_pdbx\_chem\_comp\_descriptor.type  
\_pdbx\_chem\_comp\_descriptor.program  
\_pdbx\_chem\_comp\_descriptor.program\_version  
\_pdbx\_chem\_comp\_descriptor.descriptor

|     |                  |         |       |                                                                                                                  |
|-----|------------------|---------|-------|------------------------------------------------------------------------------------------------------------------|
| NAG | SMILES           | ACDLabs | 12.01 | "O=C(NC1C(O)C(O)C(OC1O)CO)C"                                                                                     |
| NAG | InChI            | InChI   | 1.03  | "InChI=1S/C8H15NO6/c1-3(11)9-5-7(13)6(12)4(2-10)15-8(5)14/h4-8,10,12-14H,2H2,1H3,(H,9,11)/t4-,5-,6-,7-,8-/m1/s1" |
| NAG | InChIKey         | InChI   | 1.03  | OVRNDRQMDRJTHS-FMDGEEDCSA-N                                                                                      |
| NAG | SMILES_CANONICAL | CACTVS  | 3.370 | "CC(=O)N[C@H]1[C@H](O)O[C@H](CO)[C@@H](O)[C@@H]1O"                                                               |

```

NAG SMILES CACTVS 3.370
"CC(=O)N[CH]1[CH](O)O[CH](CO)[CH](O)[CH]1O"
NAG SMILES_CANONICAL "OpenEye OEToolkits" 1.7.6
"CC(=O)N[C@@H]1[C@H]([C@@H]([C@H](O[C@H]1O)CO)O)O"
NAG SMILES "OpenEye OEToolkits" 1.7.6 "CC(=O)NC1C(C(C(OC1O)CO)O)O"
# #
loop_
_pdbx_chem_comp_identifier.comp_id
_pdbx_chem_comp_identifier.type
_pdbx_chem_comp_identifier.program
_pdbx_chem_comp_identifier.program_version
_pdbx_chem_comp_identifier.identifier
NAG "SYSTEMATIC NAME" ACDLabs 12.01 "2-
(acetylamino)-2-deoxy-beta-D-glucofuranose"
NAG "SYSTEMATIC NAME" "OpenEye OEToolkits" 1.7.6 "N-
[(2R,3R,4R,5S,6R)-6-(hydroxymethyl)-2,4,5-tris(oxidanyl)oxan-3-yl]ethanamide"
NAG "CONDENSED IUPAC CARBOHYDRATE SYMBOL" GMML 1.0 DGlcPNAcb
NAG "COMMON NAME" GMML 1.0 N-acetyl-b-D-
glucopyranosamine
NAG "IUPAC CARBOHYDRATE SYMBOL" PDB-CARE 1.0 b-D-GlcPNAc
NAG "SNFG CARBOHYDRATE SYMBOL" GMML 1.0 GlcNAc
# #
loop_
_pdbx_chem_comp_feature.comp_id
_pdbx_chem_comp_feature.type
_pdbx_chem_comp_feature.value
_pdbx_chem_comp_feature.source
_pdbx_chem_comp_feature.support
NAG "CARBOHYDRATE ISOMER" D PDB ?
NAG "CARBOHYDRATE RING" pyranose PDB ?
NAG "CARBOHYDRATE ANOMER" beta PDB ?
NAG "CARBOHYDRATE PRIMARY CARBONYL GROUP" aldose PDB ?
# #
loop_
_pdbx_chem_comp_audit.comp_id
_pdbx_chem_comp_audit.action_type
_pdbx_chem_comp_audit.date
_pdbx_chem_comp_audit.processing_site
NAG "Create component" 1999-07-08 RCSB
NAG "Modify descriptor" 2011-06-04 RCSB
NAG "Modify leaving atom flag" 2011-07-01 RCSB
NAG "Modify leaving atom flag" 2012-11-26 RCSB
NAG "Other modification" 2019-08-12 RCSB
NAG "Other modification" 2019-12-19 RCSB
NAG "Other modification" 2020-07-03 RCSB
NAG "Modify name" 2020-07-17 RCSB
NAG "Modify synonyms" 2020-07-17 RCSB
##

```

## Appendix II: Example of Remediated PDB Entry 1B5F

```

# Updates from PDB carbohydrate remediation are highlighted in yellow.
#
data_1B5F
#
_entry.id    1B5F
#
...
#
loop_
_entity.id
_entity.type
_entity.src_method
_entity.pdbx_description
_entity.formula_weight
_entity.pdbx_number_of_molecules
_entity.pdbx_ec
_entity.pdbx_mutation
_entity.pdbx_fragment
_entity.details
...
3 branched man
;alpha-D-mannopyranose-(1-3)-beta-D-mannopyranose-(1-4)-2-acetamido-2-deoxy-beta-D-
glucopyranose-(1-4)-[alpha-L-fucopyranose-(1-3)]2-acetamido-2-deoxy-beta-D-glucopyranose
;
894.823    1    ?    ? ? ?
4 branched man
;beta-D-mannopyranose-(1-4)-2-acetamido-2-deoxy-beta-D-glucopyranose-(1-4)-[alpha-L-
fucopyranose-(1-3)]2-acetamido-2-deoxy-beta-D-glucopyranose
;
732.682    2    ?    ? ? ?
5 branched man
;alpha-D-mannopyranose-(1-3)-[alpha-D-mannopyranose-(1-6)]beta-D-mannopyranose-(1-4)-2-
acetamido-2-deoxy-beta-D-glucopyranose-(1-4)-[alpha-L-fucopyranose-(1-3)]2-acetamido-2-
deoxy-beta-D-glucopyranose
;
1056.964    1    ?    ? ? ?
#
...
#
loop_
_chem_comp.id
_chem_comp.type
_chem_comp.mon_nstd_flag
_chem_comp.name
_chem_comp.pdbx_synonyms
_chem_comp.formula
_chem_comp.formula_weight
ALA 'L-peptide linking'          y ALANINE                ? 'C3 H7 N
O2'          89.093
ARG 'L-peptide linking'          y ARGININE                ? 'C6 H15 N4
O2 1' 175.209
ASN 'L-peptide linking'          y ASPARAGINE              ? 'C4 H8 N2
O3'          132.118
ASP 'L-peptide linking'          y 'ASPARTIC ACID'        ? 'C4 H7 N
O4'          133.103

```

|                                                                                          |                                                              |                       |
|------------------------------------------------------------------------------------------|--------------------------------------------------------------|-----------------------|
| BMA 'D-saccharide, beta linking'                                                         | . beta-D-mannopyranose                                       | 'beta-D-              |
| mannose; D-mannose; mannose'                                                             | 'C6 H12 O6'                                                  |                       |
| 180.156                                                                                  |                                                              |                       |
| CYS 'L-peptide linking'                                                                  | y CYSTEINE                                                   | ? 'C3 H7 N            |
| O2 S'                                                                                    | 121.158                                                      |                       |
| FUC 'L-saccharide, alpha linking'                                                        | . alpha-L-fucopyranose                                       |                       |
| 'alpha-L-fucose; 6-deoxy-alpha-L-galactopyranose; L-fucose; fucose'                      | 'C6 H12 O5'                                                  |                       |
| 164.156                                                                                  |                                                              |                       |
| GLN 'L-peptide linking'                                                                  | y GLUTAMINE                                                  | ? 'C5 H10 N2          |
| O3'                                                                                      | 146.144                                                      |                       |
| GLU 'L-peptide linking'                                                                  | y 'GLUTAMIC ACID'                                            | ? 'C5 H9 N            |
| O4'                                                                                      | 147.129                                                      |                       |
| GLY 'peptide linking'                                                                    | y GLYCINE                                                    | ? 'C2 H5 N            |
| O2'                                                                                      | 75.067                                                       |                       |
| HIS 'L-peptide linking'                                                                  | y HISTIDINE                                                  | ? 'C6 H10 N3          |
| O2 1'                                                                                    | 156.162                                                      |                       |
| HOH non-polymer                                                                          | . WATER                                                      | ? 'H2 O'              |
| 18.015                                                                                   |                                                              |                       |
| ILE 'L-peptide linking'                                                                  | y ISOLEUCINE                                                 | ? 'C6 H13 N           |
| O2'                                                                                      | 131.173                                                      |                       |
| LEU 'L-peptide linking'                                                                  | y LEUCINE                                                    | ? 'C6 H13 N           |
| O2'                                                                                      | 131.173                                                      |                       |
| LYS 'L-peptide linking'                                                                  | y LYSINE                                                     | ? 'C6 H15 N2          |
| O2 1'                                                                                    | 147.195                                                      |                       |
| MAN 'D-saccharide, alpha linking'                                                        | . alpha-D-mannopyranose                                      | 'alpha-D-             |
| mannose; D-mannose; mannose'                                                             | 'C6 H12 O6'                                                  |                       |
| 180.156                                                                                  |                                                              |                       |
| MET 'L-peptide linking'                                                                  | y METHIONINE                                                 | ? 'C5 H11 N           |
| O2 S'                                                                                    | 149.211                                                      |                       |
| NAG 'D-saccharide, beta linking'                                                         | . 2-acetamido-2-deoxy-beta-D-glucopyranose                   |                       |
| ;N-acetyl-beta-D-glucosamine; 2-acetamido-2-deoxy-beta-D-glucose; 2-acetamido-2-deoxy-D- | glucose; 2-acetamido-2-deoxy-glucose; N-ACETYL-D-GLUCOSAMINE |                       |
| ;                                                                                        |                                                              |                       |
| 'C8 H15 N O6'                                                                            | 221.208                                                      |                       |
| PHE 'L-peptide linking'                                                                  | y PHENYLALANINE                                              | ? 'C9 H11 N           |
| O2'                                                                                      | 165.189                                                      |                       |
| PRO 'L-peptide linking'                                                                  | y PROLINE                                                    | ? 'C5 H9 N            |
| O2'                                                                                      | 115.130                                                      |                       |
| SER 'L-peptide linking'                                                                  | y SERINE                                                     | ? 'C3 H7 N            |
| O3'                                                                                      | 105.093                                                      |                       |
| THR 'L-peptide linking'                                                                  | y THREONINE                                                  | ? 'C4 H9 N            |
| O3'                                                                                      | 119.119                                                      |                       |
| TRP 'L-peptide linking'                                                                  | y TRYPTOPHAN                                                 | ? 'C11 H12            |
| N2 O2'                                                                                   | 204.225                                                      |                       |
| TYR 'L-peptide linking'                                                                  | y TYROSINE                                                   | ? 'C9 H11 N           |
| O3'                                                                                      | 181.189                                                      |                       |
| VAL 'L-peptide linking'                                                                  | y VALINE                                                     | ? 'C5 H11 N           |
| O2'                                                                                      | 117.146                                                      |                       |
| #                                                                                        |                                                              |                       |
| ...                                                                                      |                                                              |                       |
| #                                                                                        |                                                              |                       |
| loop_                                                                                    |                                                              |                       |
| pdbx_chem_comp_identifier.comp_id                                                        |                                                              |                       |
| pdbx_chem_comp_identifier.type                                                           |                                                              |                       |
| pdbx_chem_comp_identifier.program                                                        |                                                              |                       |
| pdbx_chem_comp_identifier.program_version                                                |                                                              |                       |
| pdbx_chem_comp_identifier.identifier                                                     |                                                              |                       |
| BMA 'CONDENSED IUPAC CARBOHYDRATE SYMBOL'                                                | GMML                                                         | 1.0 DManpb            |
| BMA 'COMMON NAME'                                                                        | GMML                                                         | 1.0 b-D-mannopyranose |



```

BMA 'IUPAC CARBOHYDRATE SYMBOL' PDB-CARE 1.0 b-D-Manp
BMA 'SNFG CARBOHYDRATE SYMBOL' GMLL 1.0 Man
FUC 'CONDENSED IUPAC CARBOHYDRATE SYMBOL' GMLL 1.0 LFucpa
FUC 'COMMON NAME' GMLL 1.0 a-L-fucopyranose
FUC 'IUPAC CARBOHYDRATE SYMBOL' PDB-CARE 1.0 a-L-Fucp
FUC 'SNFG CARBOHYDRATE SYMBOL' GMLL 1.0 Fuc
MAN 'CONDENSED IUPAC CARBOHYDRATE SYMBOL' GMLL 1.0 DManpa
MAN 'COMMON NAME' GMLL 1.0 a-D-mannopyranose
MAN 'IUPAC CARBOHYDRATE SYMBOL' PDB-CARE 1.0 a-D-Manp
MAN 'SNFG CARBOHYDRATE SYMBOL' GMLL 1.0 Man
NAG 'CONDENSED IUPAC CARBOHYDRATE SYMBOL' GMLL 1.0 DGlcNac
NAG 'COMMON NAME' GMLL 1.0 N-acetyl-b-D-glucofuranosamine
NAG 'IUPAC CARBOHYDRATE SYMBOL' PDB-CARE 1.0 b-D-GlcNac
NAG 'SNFG CARBOHYDRATE SYMBOL' GMLL 1.0 GlcNac
#
...
#
loop_
  pdbx_entity_branch.entity_id
  pdbx_entity_branch.type
3 oligosaccharide
4 oligosaccharide
5 oligosaccharide
#
loop_
  pdbx_entity_branch_descriptor.ordinal
  pdbx_entity_branch_descriptor.entity_id
  pdbx_entity_branch_descriptor.descriptor
  pdbx_entity_branch_descriptor.type
  pdbx_entity_branch_descriptor.program
  pdbx_entity_branch_descriptor.program_version
1 3 'DManpa1-3DManpb1-4DGlcNac1-4[LFucpa1-3]DGlcNac1-' 'Glycam Condensed Sequence'
GMLL 1.0
2 3 'WURCS=2.0/4,5,4/[a2122h-1b_1-5_2*NCC/3=0][a221m-1a_1-5][a1122h-1b_1-5][a1122h-1a_1-5]/1-2-1-3-4/a3-b1_a4-c1_c4-d1_d3-e1'
WURCS PDB2Glycan 1.1.0
3 3 '[[[(4+1)][b-D-GlcNac]][(3+1)][a-L-Fucp]][(4+1)][b-D-GlcNac]][(4+1)][b-D-Manp]][(3+1)][a-D-Manp]]]' LINUCS PDB-CARE
?
4 4 'DManpb1-4DGlcNac1-4[LFucpa1-3]DGlcNac1-' 'Glycam Condensed Sequence' GMLL
1.0
5 4 'WURCS=2.0/3,4,3/[a2122h-1b_1-5_2*NCC/3=0][a221m-1a_1-5][a1122h-1b_1-5]/1-2-1-3/a3-b1_a4-c1_c4-d1' WURCS PDB2Glycan 1.1.0
6 4 '[[[(4+1)][b-D-GlcNac]][(3+1)][a-L-Fucp]][(4+1)][b-D-GlcNac]][(4+1)][b-D-Manp]]]' LINUCS PDB-CARE
?
7 5 'DManpa1-3[DManpa1-6]DManpb1-4DGlcNac1-4[LFucpa1-3]DGlcNac1-' 'Glycam Condensed Sequence' GMLL 1.0
8 5
'WURCS=2.0/4,6,5/[a2122h-1b_1-5_2*NCC/3=0][a221m-1a_1-5][a1122h-1b_1-5][a1122h-1a_1-5]/1-2-1-3-4-4/a3-b1_a4-c1_c4-d1_d3-e1_d6-f1'
WURCS PDB2Glycan 1.1.0
9 5 '[[[(4+1)][b-D-GlcNac]][(3+1)][a-L-Fucp]][(4+1)][b-D-GlcNac]][(4+1)][b-D-Manp]][(3+1)][a-D-Manp]][(6+1)][a-D-Manp]]]'
LINUCS PDB-CARE ?
#
loop_
  pdbx_entity_branch_list.entity_id
  pdbx_entity_branch_list.comp_id

```

```

_pdbx_entity_branch_list.num
_pdbx_entity_branch_list.hetero
3 NAG 1 n
3 NAG 2 n
3 BMA 3 n
3 MAN 4 n
3 FUC 5 n
4 NAG 1 n
4 NAG 2 n
4 BMA 3 n
4 FUC 4 n
5 NAG 1 n
5 NAG 2 n
5 BMA 3 n
5 MAN 4 n
5 MAN 5 n
5 FUC 6 n
#
loop_
_pdbx_entity_branch_link.link_id
_pdbx_entity_branch_link.entity_id
_pdbx_entity_branch_link.entity_branch_list_num_1
_pdbx_entity_branch_link.comp_id_1
_pdbx_entity_branch_link.atom_id_1
_pdbx_entity_branch_link.leaving_atom_id_1
_pdbx_entity_branch_link.entity_branch_list_num_2
_pdbx_entity_branch_link.comp_id_2
_pdbx_entity_branch_link.atom_id_2
_pdbx_entity_branch_link.leaving_atom_id_2
_pdbx_entity_branch_link.value_order
_pdbx_entity_branch_link.details
1 3 2 NAG C1 O1 1 NAG O4 HO4 sing ?
2 3 3 BMA C1 O1 2 NAG O4 HO4 sing ?
3 3 4 MAN C1 O1 3 BMA O3 HO3 sing ?
4 3 5 FUC C1 O1 1 NAG O3 HO3 sing ?
5 4 2 NAG C1 O1 1 NAG O4 HO4 sing ?
6 4 3 BMA C1 O1 2 NAG O4 HO4 sing ?
7 4 4 FUC C1 O1 1 NAG O3 HO3 sing ?
8 5 2 NAG C1 O1 1 NAG O4 HO4 sing ?
9 5 3 BMA C1 O1 2 NAG O4 HO4 sing ?
10 5 4 MAN C1 O1 3 BMA O3 HO3 sing ?
11 5 5 MAN C1 O1 3 BMA O6 HO6 sing ?
12 5 6 FUC C1 O1 1 NAG O3 HO3 sing ?
#
loop_
_pdbx_branch_scheme.asym_id
_pdbx_branch_scheme.entity_id
_pdbx_branch_scheme.mon_id
_pdbx_branch_scheme.num
_pdbx_branch_scheme.pdb_asym_id
_pdbx_branch_scheme.pdb_mon_id
_pdbx_branch_scheme.pdb_seq_num
_pdbx_branch_scheme.auth_asym_id
_pdbx_branch_scheme.auth_mon_id
_pdbx_branch_scheme.auth_seq_num
_pdbx_branch_scheme.hetero
E 3 NAG 1 E NAG 1 E NAG 401 n
E 3 NAG 2 E NAG 2 E NAG 403 n
E 3 BMA 3 E BMA 3 E MAN 404 n

```

```
E 3 MAN 4 E MAN 4 E MAN 405 n
E 3 FUC 5 E FUC 5 E FUC 402 n
F 4 NAG 1 F NAG 1 F NAG 501 n
F 4 NAG 2 F NAG 2 F NAG 503 n
F 4 BMA 3 F BMA 3 F MAN 504 n
F 4 FUC 4 F FUC 4 F FUC 502 n
G 5 NAG 1 G NAG 1 G NAG 401 n
G 5 NAG 2 G NAG 2 G NAG 403 n
G 5 BMA 3 G BMA 3 G MAN 404 n
G 5 MAN 4 G MAN 4 G MAN 405 n
G 5 MAN 5 G MAN 5 G MAN 406 n
G 5 FUC 6 G FUC 6 G FUC 402 n
H 4 NAG 1 H NAG 1 H NAG 501 n
H 4 NAG 2 H NAG 2 H NAG 503 n
H 4 BMA 3 H BMA 3 H MAN 504 n
H 4 FUC 4 H FUC 4 H FUC 502 n
```

```
#
```

```
...
```

```
#
```

```
loop_
```

```
_struct_asym.id
```

```
_struct_asym.pdbx_blank_PDB_chainid_flag
```

```
_struct_asym.pdbx_modified
```

```
_struct_asym.entity_id
```

```
_struct_asym.details
```

```
A N N 1 ?
```

```
B N N 2 ?
```

```
C N N 1 ?
```

```
D N N 2 ?
```

```
E N N 3 ?
```

```
F N N 4 ?
```

```
G N N 5 ?
```

```
H N N 4 ?
```

```
I N N 6 ?
```

```
J N N 6 ?
```

```
K N N 6 ?
```

```
L N N 6 ?
```

```
#
```

```
...
```

```
#
```

```
loop_
```

```
_struct_conn.id
```

```
_struct_conn.conn_type_id
```

```
_struct_conn.pdbx_leaving_atom_flag
```

```
_struct_conn.pdbx_PDB_id
```

```
_struct_conn.ptnr1_label_asym_id
```

```
_struct_conn.ptnr1_label_comp_id
```

```
_struct_conn.ptnr1_label_seq_id
```

```
_struct_conn.ptnr1_label_atom_id
```

```
_struct_conn.pdbx_ptnr1_label_alt_id
```

```
_struct_conn.pdbx_ptnr1_PDB_ins_code
```

```
_struct_conn.pdbx_ptnr1_standard_comp_id
```

```
_struct_conn.ptnr1_symmetry
```

```
_struct_conn.ptnr2_label_asym_id
```

```
_struct_conn.ptnr2_label_comp_id
```

```
_struct_conn.ptnr2_label_seq_id
```

```
_struct_conn.ptnr2_label_atom_id
```

```
_struct_conn.pdbx_ptnr2_label_alt_id
```

```
_struct_conn.pdbx_ptnr2_PDB_ins_code
```

```

_struct_conn.ptnr1_auth_asym_id
_struct_conn.ptnr1_auth_comp_id
_struct_conn.ptnr1_auth_seq_id
_struct_conn.ptnr2_auth_asym_id
_struct_conn.ptnr2_auth_comp_id
_struct_conn.ptnr2_auth_seq_id
_struct_conn.ptnr2_symmetry
_struct_conn.pdbx_ptnr3_label_atom_id
_struct_conn.pdbx_ptnr3_label_seq_id
_struct_conn.pdbx_ptnr3_label_comp_id
_struct_conn.pdbx_ptnr3_label_asym_id
_struct_conn.pdbx_ptnr3_label_alt_id
_struct_conn.pdbx_ptnr3_PDB_ins_code
_struct_conn.details
_struct_conn.pdbx_dist_value
_struct_conn.pdbx_value_order
_struct_conn.pdbx_role
disulf1  disulf ?    ? A CYS 46  SG  A ? ? 1_555 A CYS 52  SG  A ? A CYS 45  A CYS 50
1_555 ? ? ? ? ? ? ? 2.027 ? ?
disulf2  disulf ?    ? A CYS 46  SG  B ? ? 1_555 A CYS 52  SG  B ? A CYS 45  A CYS 50
1_555 ? ? ? ? ? ? ? 2.032 ? ?
disulf3  disulf ?    ? A CYS 207 SG  ? ? ? 1_555 A CYS 211 SG  ? ? A CYS 206 A CYS 210
1_555 ? ? ? ? ? ? ? 2.067 ? ?
disulf4  disulf ?    ? B CYS 7   SG  ? ? ? 1_555 B CYS 44  SG  ? ? B CYS 249 B CYS 282
1_555 ? ? ? ? ? ? ? 2.078 ? ?
disulf5  disulf ?    ? C CYS 46  SG  ? ? ? 1_555 C CYS 52  SG  ? ? C CYS 45  C CYS 50
1_555 ? ? ? ? ? ? ? 2.037 ? ?
disulf6  disulf ?    ? C CYS 207 SG  ? ? ? 1_555 C CYS 211 SG  ? ? C CYS 206 C CYS 210
1_555 ? ? ? ? ? ? ? 2.060 ? ?
disulf7  disulf ?    ? D CYS 7   SG  ? ? ? 1_555 D CYS 44  SG  ? ? D CYS 249 D CYS 282
1_555 ? ? ? ? ? ? ? 2.056 ? ?
covale1  covale one  ? A ASN 69  ND2 ? ? ? 1_555 E NAG .  C1 ? ? A ASN 67  E NAG 1
1_555 ? ? ? ? ? ? ? 1.471 ? N-Glycosylation
covale2  covale one  ? B ASN 15  ND2 ? ? ? 1_555 F NAG .  C1 ? ? B ASN 257 F NAG 1
1_555 ? ? ? ? ? ? ? 1.450 ? N-Glycosylation
covale3  covale one  ? C ASN 69  ND2 ? ? ? 1_555 G NAG .  C1 ? ? C ASN 67  G NAG 1
1_555 ? ? ? ? ? ? ? 1.483 ? N-Glycosylation
covale4  covale one  ? D ASN 15  ND2 ? ? ? 1_555 H NAG .  C1 ? ? D ASN 257 H NAG 1
1_555 ? ? ? ? ? ? ? 1.456 ? N-Glycosylation
covale5  covale both ? E NAG .  04 ? ? ? 1_555 E NAG .  C1 ? ? E NAG 1  E NAG 2
1_555 ? ? ? ? ? ? ? 1.387 ? ?
covale6  covale both ? E NAG .  03 ? ? ? 1_555 E FUC .  C1 ? ? E NAG 1  E FUC 5
1_555 ? ? ? ? ? ? ? 1.430 ? ?
covale7  covale both ? E NAG .  04 ? ? ? 1_555 E BMA .  C1 ? ? E NAG 2  E BMA 3
1_555 ? ? ? ? ? ? ? 1.396 ? ?
covale8  covale both ? E BMA .  03 ? ? ? 1_555 E MAN .  C1 ? ? E BMA 3  E MAN 4
1_555 ? ? ? ? ? ? ? 1.408 ? ?
covale9  covale both ? F NAG .  04 ? ? ? 1_555 F NAG .  C1 ? ? F NAG 1  F NAG 2
1_555 ? ? ? ? ? ? ? 1.385 ? ?
covale10 covale both ? F NAG .  03 ? ? ? 1_555 F FUC .  C1 ? ? F NAG 1  F FUC 4
1_555 ? ? ? ? ? ? ? 1.425 ? ?
covale11 covale both ? F NAG .  04 ? ? ? 1_555 F BMA .  C1 ? ? F NAG 2  F BMA 3
1_555 ? ? ? ? ? ? ? 1.389 ? ?
covale12 covale both ? G NAG .  04 ? ? ? 1_555 G NAG .  C1 ? ? G NAG 1  G NAG 2
1_555 ? ? ? ? ? ? ? 1.388 ? ?
covale13 covale both ? G NAG .  03 ? ? ? 1_555 G FUC .  C1 ? ? G NAG 1  G FUC 6
1_555 ? ? ? ? ? ? ? 1.427 ? ?
covale14 covale both ? G NAG .  04 ? ? ? 1_555 G BMA .  C1 ? ? G NAG 2  G BMA 3
1_555 ? ? ? ? ? ? ? 1.399 ? ?

```

```

covale15 covale both ? G BMA . 03 ? ? ? 1_555 G MAN . C1 ? ? G BMA 3 G MAN 4
1_555 ? ? ? ? ? ? ? 1.406 ? ?
covale16 covale both ? G BMA . 06 ? ? ? 1_555 G MAN . C1 ? ? G BMA 3 G MAN 5
1_555 ? ? ? ? ? ? ? 1.410 ? ?
covale17 covale both ? H NAG . 04 ? ? ? 1_555 H NAG . C1 ? ? H NAG 1 H NAG 2
1_555 ? ? ? ? ? ? ? 1.390 ? ?
covale18 covale both ? H NAG . 03 ? ? ? 1_555 H FUC . C1 A ? H NAG 1 H FUC 4
1_555 ? ? ? ? ? ? ? 1.424 ? ?
covale19 covale both ? H NAG . 03 ? ? ? 1_555 H FUC . C1 B ? H NAG 1 H FUC 4
1_555 ? ? ? ? ? ? ? 1.416 ? ?
covale20 covale both ? H NAG . 04 ? ? ? 1_555 H BMA . C1 ? ? H NAG 2 H BMA 3
1_555 ? ? ? ? ? ? ? 1.391 ? ?
#
...
#
loop_
_atom_site.group_PDB
_atom_site.id
_atom_site.type_symbol
_atom_site.label_atom_id
_atom_site.label_alt_id
_atom_site.label_comp_id
_atom_site.label_asym_id
_atom_site.label_entity_id
_atom_site.label_seq_id
_atom_site.pdbx_PDB_ins_code
_atom_site.Cartn_x
_atom_site.Cartn_y
_atom_site.Cartn_z
_atom_site.occupancy
_atom_site.B_iso_or_equiv
_atom_site.pdbx_formal_charge
_atom_site.auth_seq_id
_atom_site.auth_comp_id
_atom_site.auth_asym_id
_atom_site.auth_atom_id
_atom_site.pdbx_PDB_model_num
...

```

|        |      |   |    |   |     |   |   |   |   |        |        |        |      |       |   |   |     |   |    |   |
|--------|------|---|----|---|-----|---|---|---|---|--------|--------|--------|------|-------|---|---|-----|---|----|---|
| HETATM | 5072 | C | C1 | . | NAG | E | 3 | . | ? | 35.913 | 20.650 | 4.893  | 1.00 | 22.56 | ? | 1 | NAG | E | C1 | 1 |
| HETATM | 5073 | C | C2 | . | NAG | E | 3 | . | ? | 37.104 | 21.268 | 5.555  | 1.00 | 30.15 | ? | 1 | NAG | E | C2 | 1 |
| HETATM | 5074 | C | C3 | . | NAG | E | 3 | . | ? | 38.299 | 20.356 | 5.576  | 1.00 | 30.02 | ? | 1 | NAG | E | C3 | 1 |
| HETATM | 5075 | C | C4 | . | NAG | E | 3 | . | ? | 37.901 | 18.990 | 6.097  | 1.00 | 27.08 | ? | 1 | NAG | E | C4 | 1 |
| HETATM | 5076 | C | C5 | . | NAG | E | 3 | . | ? | 36.704 | 18.416 | 5.335  | 1.00 | 26.79 | ? | 1 | NAG | E | C5 | 1 |
| HETATM | 5077 | C | C6 | . | NAG | E | 3 | . | ? | 36.168 | 17.108 | 5.930  | 1.00 | 25.93 | ? | 1 | NAG | E | C6 | 1 |
| HETATM | 5078 | C | C7 | . | NAG | E | 3 | . | ? | 37.278 | 23.649 | 5.795  | 1.00 | 37.04 | ? | 1 | NAG | E | C7 | 1 |
| HETATM | 5079 | C | C8 | . | NAG | E | 3 | . | ? | 37.049 | 24.933 | 5.037  | 1.00 | 53.78 | ? | 1 | NAG | E | C8 | 1 |
| HETATM | 5080 | N | N2 | . | NAG | E | 3 | . | ? | 37.473 | 22.581 | 5.018  | 1.00 | 36.08 | ? | 1 | NAG | E | N2 | 1 |
| HETATM | 5081 | O | O3 | . | NAG | E | 3 | . | ? | 39.195 | 20.903 | 6.586  | 1.00 | 36.65 | ? | 1 | NAG | E | O3 | 1 |
| HETATM | 5082 | O | O4 | . | NAG | E | 3 | . | ? | 39.010 | 18.099 | 6.001  | 1.00 | 34.37 | ? | 1 | NAG | E | O4 | 1 |
| HETATM | 5083 | O | O5 | . | NAG | E | 3 | . | ? | 35.614 | 19.356 | 5.369  | 1.00 | 24.51 | ? | 1 | NAG | E | O5 | 1 |
| HETATM | 5084 | O | O6 | . | NAG | E | 3 | . | ? | 36.104 | 17.215 | 7.365  | 1.00 | 21.96 | ? | 1 | NAG | E | O6 | 1 |
| HETATM | 5085 | O | O7 | . | NAG | E | 3 | . | ? | 37.284 | 23.608 | 7.022  | 1.00 | 53.48 | ? | 1 | NAG | E | O7 | 1 |
| HETATM | 5086 | C | C1 | . | NAG | E | 3 | . | ? | 39.385 | 17.481 | 7.185  | 1.00 | 36.71 | ? | 2 | NAG | E | C1 | 1 |
| HETATM | 5087 | C | C2 | . | NAG | E | 3 | . | ? | 40.647 | 16.688 | 7.073  | 1.00 | 31.39 | ? | 2 | NAG | E | C2 | 1 |
| HETATM | 5088 | C | C3 | . | NAG | E | 3 | . | ? | 40.931 | 16.001 | 8.392  | 1.00 | 35.05 | ? | 2 | NAG | E | C3 | 1 |
| HETATM | 5089 | C | C4 | . | NAG | E | 3 | . | ? | 40.967 | 16.962 | 9.541  | 1.00 | 32.61 | ? | 2 | NAG | E | C4 | 1 |
| HETATM | 5090 | C | C5 | . | NAG | E | 3 | . | ? | 39.666 | 17.783 | 9.563  | 1.00 | 28.91 | ? | 2 | NAG | E | C5 | 1 |
| HETATM | 5091 | C | C6 | . | NAG | E | 3 | . | ? | 39.666 | 18.963 | 10.521 | 1.00 | 35.91 | ? | 2 | NAG | E | C6 | 1 |
| HETATM | 5092 | C | C7 | . | NAG | E | 3 | . | ? | 40.571 | 15.771 | 4.825  | 1.00 | 47.69 | ? | 2 | NAG | E | C7 | 1 |

|        |      |   |    |           |   |        |         |        |      |       |   |   |       |    |   |
|--------|------|---|----|-----------|---|--------|---------|--------|------|-------|---|---|-------|----|---|
| HETATM | 5093 | C | C8 | NAG E 3   | ? | 41.437 | 14.692  | 4.234  | 1.00 | 41.34 | ? | 2 | NAG E | C8 | 1 |
| HETATM | 5094 | N | N2 | NAG E 3   | ? | 40.415 | 15.590  | 6.124  | 1.00 | 38.22 | ? | 2 | NAG E | N2 | 1 |
| HETATM | 5095 | O | O3 | NAG E 3   | ? | 42.095 | 15.183  | 8.215  | 1.00 | 43.65 | ? | 2 | NAG E | O3 | 1 |
| HETATM | 5096 | O | O4 | NAG E 3   | ? | 41.151 | 16.298  | 10.790 | 1.00 | 35.78 | ? | 2 | NAG E | O4 | 1 |
| HETATM | 5097 | O | O5 | NAG E 3   | ? | 39.390 | 18.346  | 8.265  | 1.00 | 33.88 | ? | 2 | NAG E | O5 | 1 |
| HETATM | 5098 | O | O6 | NAG E 3   | ? | 38.344 | 19.254  | 10.997 | 1.00 | 51.88 | ? | 2 | NAG E | O6 | 1 |
| HETATM | 5099 | O | O7 | NAG E 3   | ? | 40.073 | 16.681  | 4.178  | 1.00 | 79.63 | ? | 2 | NAG E | O7 | 1 |
| HETATM | 5100 | C | C1 | BMA E 3   | ? | 42.097 | 16.784  | 11.695 | 1.00 | 42.84 | ? | 3 | BMA E | C1 | 1 |
| HETATM | 5101 | C | C2 | BMA E 3   | ? | 41.865 | 16.288  | 13.096 | 1.00 | 43.10 | ? | 3 | BMA E | C2 | 1 |
| HETATM | 5102 | C | C3 | BMA E 3   | ? | 42.943 | 16.985  | 13.980 | 1.00 | 47.36 | ? | 3 | BMA E | C3 | 1 |
| HETATM | 5103 | C | C4 | BMA E 3   | ? | 44.290 | 16.424  | 13.474 | 1.00 | 44.98 | ? | 3 | BMA E | C4 | 1 |
| HETATM | 5104 | C | C5 | BMA E 3   | ? | 44.507 | 16.889  | 12.052 | 1.00 | 49.37 | ? | 3 | BMA E | C5 | 1 |
| HETATM | 5105 | C | C6 | BMA E 3   | ? | 45.841 | 16.392  | 11.476 | 1.00 | 50.83 | ? | 3 | BMA E | C6 | 1 |
| HETATM | 5106 | O | O2 | BMA E 3   | ? | 42.156 | 14.859  | 13.168 | 1.00 | 38.32 | ? | 3 | BMA E | O2 | 1 |
| HETATM | 5107 | O | O3 | BMA E 3   | ? | 42.845 | 16.435  | 15.311 | 1.00 | 49.32 | ? | 3 | BMA E | O3 | 1 |
| HETATM | 5108 | O | O4 | BMA E 3   | ? | 45.320 | 16.945  | 14.296 | 1.00 | 54.09 | ? | 3 | BMA E | O4 | 1 |
| HETATM | 5109 | O | O5 | BMA E 3   | ? | 43.409 | 16.440  | 11.229 | 1.00 | 50.64 | ? | 3 | BMA E | O5 | 1 |
| HETATM | 5110 | O | O6 | BMA E 3   | ? | 46.044 | 14.956  | 11.468 | 1.00 | 60.64 | ? | 3 | BMA E | O6 | 1 |
| HETATM | 5111 | C | C1 | MAN E 3   | ? | 42.913 | 17.368  | 16.363 | 1.00 | 51.69 | ? | 4 | MAN E | C1 | 1 |
| HETATM | 5112 | C | C2 | MAN E 3   | ? | 42.977 | 16.574  | 17.663 | 1.00 | 60.04 | ? | 4 | MAN E | C2 | 1 |
| HETATM | 5113 | C | C3 | MAN E 3   | ? | 41.902 | 15.496  | 17.476 | 1.00 | 63.95 | ? | 4 | MAN E | C3 | 1 |
| HETATM | 5114 | C | C4 | MAN E 3   | ? | 40.526 | 16.156  | 17.379 | 1.00 | 60.30 | ? | 4 | MAN E | C4 | 1 |
| HETATM | 5115 | C | C5 | MAN E 3   | ? | 40.528 | 17.198  | 16.298 | 1.00 | 56.41 | ? | 4 | MAN E | C5 | 1 |
| HETATM | 5116 | C | C6 | MAN E 3   | ? | 39.257 | 18.005  | 16.043 | 1.00 | 54.83 | ? | 4 | MAN E | C6 | 1 |
| HETATM | 5117 | O | O2 | MAN E 3   | ? | 42.775 | 17.477  | 18.789 | 1.00 | 46.92 | ? | 4 | MAN E | O2 | 1 |
| HETATM | 5118 | O | O3 | MAN E 3   | ? | 41.959 | 14.538  | 18.533 | 1.00 | 79.05 | ? | 4 | MAN E | O3 | 1 |
| HETATM | 5119 | O | O4 | MAN E 3   | ? | 39.525 | 15.184  | 17.115 | 1.00 | 49.74 | ? | 4 | MAN E | O4 | 1 |
| HETATM | 5120 | O | O5 | MAN E 3   | ? | 41.655 | 18.094  | 16.369 | 1.00 | 52.25 | ? | 4 | MAN E | O5 | 1 |
| HETATM | 5121 | O | O6 | MAN E 3   | ? | 39.368 | 18.974  | 14.965 | 1.00 | 49.83 | ? | 4 | MAN E | O6 | 1 |
| HETATM | 5122 | C | C1 | FUC E 3   | ? | 40.249 | 21.729  | 6.085  | 1.00 | 49.04 | ? | 5 | FUC E | C1 | 1 |
| HETATM | 5123 | C | C2 | FUC E 3   | ? | 41.031 | 22.463  | 7.181  | 1.00 | 43.14 | ? | 5 | FUC E | C2 | 1 |
| HETATM | 5124 | C | C3 | FUC E 3   | ? | 41.925 | 21.537  | 7.988  | 1.00 | 54.66 | ? | 5 | FUC E | C3 | 1 |
| HETATM | 5125 | C | C4 | FUC E 3   | ? | 42.813 | 20.733  | 7.029  | 1.00 | 54.35 | ? | 5 | FUC E | C4 | 1 |
| HETATM | 5126 | C | C5 | FUC E 3   | ? | 41.910 | 19.991  | 6.016  | 1.00 | 55.62 | ? | 5 | FUC E | C5 | 1 |
| HETATM | 5127 | C | C6 | FUC E 3   | ? | 42.663 | 19.219  | 4.977  | 1.00 | 42.57 | ? | 5 | FUC E | C6 | 1 |
| HETATM | 5128 | O | O2 | FUC E 3   | ? | 40.136 | 23.111  | 8.077  | 1.00 | 47.37 | ? | 5 | FUC E | O2 | 1 |
| HETATM | 5129 | O | O3 | FUC E 3   | ? | 42.691 | 22.301  | 8.922  | 1.00 | 86.06 | ? | 5 | FUC E | O3 | 1 |
| HETATM | 5130 | O | O4 | FUC E 3   | ? | 43.646 | 21.632  | 6.310  | 1.00 | 60.09 | ? | 5 | FUC E | O4 | 1 |
| HETATM | 5131 | O | O5 | FUC E 3   | ? | 41.100 | 20.948  | 5.251  | 1.00 | 56.15 | ? | 5 | FUC E | O5 | 1 |
| HETATM | 5132 | C | C1 | NAG F 4   | ? | 20.063 | -22.064 | 24.947 | 1.00 | 29.49 | ? | 1 | NAG F | C1 | 1 |
| HETATM | 5133 | C | C2 | NAG F 4   | ? | 20.028 | -23.128 | 25.994 | 1.00 | 41.96 | ? | 1 | NAG F | C2 | 1 |
| HETATM | 5134 | C | C3 | NAG F 4   | ? | 18.875 | -22.872 | 26.925 | 1.00 | 47.29 | ? | 1 | NAG F | C3 | 1 |
| HETATM | 5135 | C | C4 | NAG F 4   | ? | 18.905 | -21.466 | 27.475 | 1.00 | 49.79 | ? | 1 | NAG F | C4 | 1 |
| HETATM | 5136 | C | C5 | NAG F 4   | ? | 18.973 | -20.463 | 26.305 | 1.00 | 36.92 | ? | 1 | NAG F | C5 | 1 |
| HETATM | 5137 | C | C6 | NAG F 4   | ? | 19.081 | -19.020 | 26.758 | 1.00 | 32.87 | ? | 1 | NAG F | C6 | 1 |
| HETATM | 5138 | C | C7 | A NAG F 4 | ? | 21.077 | -25.259 | 25.482 | 0.72 | 43.79 | ? | 1 | NAG F | C7 | 1 |
| HETATM | 5139 | C | C7 | B NAG F 4 | ? | 19.216 | -24.662 | 24.244 | 0.28 | 43.98 | ? | 1 | NAG F | C7 | 1 |
| HETATM | 5140 | C | C8 | A NAG F 4 | ? | 21.165 | -26.191 | 24.296 | 0.72 | 50.88 | ? | 1 | NAG F | C8 | 1 |
| HETATM | 5141 | C | C8 | B NAG F 4 | ? | 17.734 | -24.925 | 24.341 | 0.28 | 32.44 | ? | 1 | NAG F | C8 | 1 |
| HETATM | 5142 | N | N2 | A NAG F 4 | ? | 20.008 | -24.476 | 25.448 | 0.72 | 43.09 | ? | 1 | NAG F | N2 | 1 |
| HETATM | 5143 | N | N2 | B NAG F 4 | ? | 19.821 | -24.455 | 25.401 | 0.28 | 43.57 | ? | 1 | NAG F | N2 | 1 |
| HETATM | 5144 | O | O3 | NAG F 4   | ? | 18.920 | -23.795 | 28.041 | 1.00 | 57.75 | ? | 1 | NAG F | O3 | 1 |
| HETATM | 5145 | O | O4 | NAG F 4   | ? | 17.730 | -21.261 | 28.248 | 1.00 | 54.51 | ? | 1 | NAG F | O4 | 1 |
| HETATM | 5146 | O | O5 | NAG F 4   | ? | 20.165 | -20.790 | 25.534 | 1.00 | 29.19 | ? | 1 | NAG F | O5 | 1 |
| HETATM | 5147 | O | O6 | NAG F 4   | ? | 20.257 | -18.838 | 27.554 | 1.00 | 35.82 | ? | 1 | NAG F | O6 | 1 |
| HETATM | 5148 | O | O7 | A NAG F 4 | ? | 21.933 | -25.266 | 26.359 | 0.72 | 38.83 | ? | 1 | NAG F | O7 | 1 |
| HETATM | 5149 | O | O7 | B NAG F 4 | ? | 19.793 | -24.653 | 23.159 | 0.28 | 54.77 | ? | 1 | NAG F | O7 | 1 |
| HETATM | 5150 | C | C1 | NAG F 4   | ? | 17.810 | -20.607 | 29.466 | 1.00 | 51.07 | ? | 2 | NAG F | C1 | 1 |
| HETATM | 5151 | C | C2 | NAG F 4   | ? | 16.427 | -20.315 | 29.968 | 1.00 | 40.53 | ? | 2 | NAG F | C2 | 1 |

|        |      |   |    |     |   |   |   |         |         |        |      |        |   |   |     |   |    |   |
|--------|------|---|----|-----|---|---|---|---------|---------|--------|------|--------|---|---|-----|---|----|---|
| HETATM | 5152 | C | C3 | NAG | F | 4 | ? | 16.433  | -19.728 | 31.351 | 1.00 | 55.87  | ? | 2 | NAG | F | C3 | 1 |
| HETATM | 5153 | C | C4 | NAG | F | 4 | ? | 17.457  | -20.308 | 32.283 | 1.00 | 72.14  | ? | 2 | NAG | F | C4 | 1 |
| HETATM | 5154 | C | C5 | NAG | F | 4 | ? | 18.824  | -20.530 | 31.611 | 1.00 | 64.24  | ? | 2 | NAG | F | C5 | 1 |
| HETATM | 5155 | C | C6 | NAG | F | 4 | ? | 19.812  | -21.311 | 32.464 | 1.00 | 60.22  | ? | 2 | NAG | F | C6 | 1 |
| HETATM | 5156 | C | C7 | NAG | F | 4 | ? | 14.740  | -19.582 | 28.390 | 1.00 | 52.83  | ? | 2 | NAG | F | C7 | 1 |
| HETATM | 5157 | C | C8 | NAG | F | 4 | ? | 13.557  | -20.004 | 29.229 | 1.00 | 74.85  | ? | 2 | NAG | F | C8 | 1 |
| HETATM | 5158 | N | N2 | NAG | F | 4 | ? | 15.831  | -19.294 | 29.090 | 1.00 | 43.93  | ? | 2 | NAG | F | N2 | 1 |
| HETATM | 5159 | O | O3 | NAG | F | 4 | ? | 15.101  | -19.840 | 31.894 | 1.00 | 42.65  | ? | 2 | NAG | F | O3 | 1 |
| HETATM | 5160 | O | O4 | NAG | F | 4 | ? | 17.650  | -19.445 | 33.404 | 1.00 | 87.58  | ? | 2 | NAG | F | O4 | 1 |
| HETATM | 5161 | O | O5 | NAG | F | 4 | ? | 18.603  | -21.292 | 30.394 | 1.00 | 59.45  | ? | 2 | NAG | F | O5 | 1 |
| HETATM | 5162 | O | O6 | NAG | F | 4 | ? | 20.317  | -22.435 | 31.717 | 1.00 | 94.45  | ? | 2 | NAG | F | O6 | 1 |
| HETATM | 5163 | O | O7 | NAG | F | 4 | ? | 14.682  | -19.508 | 27.167 | 1.00 | 75.95  | ? | 2 | NAG | F | O7 | 1 |
| HETATM | 5164 | C | C1 | BMA | F | 4 | ? | 16.933  | -19.668 | 34.572 | 1.00 | 99.27  | ? | 3 | BMA | F | C1 | 1 |
| HETATM | 5165 | C | C2 | BMA | F | 4 | ? | 17.871  | -19.717 | 35.751 | 1.00 | 104.96 | ? | 3 | BMA | F | C2 | 1 |
| HETATM | 5166 | C | C3 | BMA | F | 4 | ? | 16.994  | -19.988 | 36.964 | 1.00 | 110.16 | ? | 3 | BMA | F | C3 | 1 |
| HETATM | 5167 | C | C4 | BMA | F | 4 | ? | 15.947  | -18.899 | 37.144 | 1.00 | 108.29 | ? | 3 | BMA | F | C4 | 1 |
| HETATM | 5168 | C | C5 | BMA | F | 4 | ? | 15.086  | -18.833 | 35.895 | 1.00 | 104.58 | ? | 3 | BMA | F | C5 | 1 |
| HETATM | 5169 | C | C6 | BMA | F | 4 | ? | 13.989  | -17.767 | 35.968 | 1.00 | 103.25 | ? | 3 | BMA | F | C6 | 1 |
| HETATM | 5170 | O | O2 | BMA | F | 4 | ? | 18.763  | -18.571 | 35.743 | 1.00 | 101.38 | ? | 3 | BMA | F | O2 | 1 |
| HETATM | 5171 | O | O3 | BMA | F | 4 | ? | 17.722  | -20.215 | 38.168 | 1.00 | 136.64 | ? | 3 | BMA | F | O3 | 1 |
| HETATM | 5172 | O | O4 | BMA | F | 4 | ? | 15.100  | -19.168 | 38.249 | 1.00 | 112.48 | ? | 3 | BMA | F | O4 | 1 |
| HETATM | 5173 | O | O5 | BMA | F | 4 | ? | 15.926  | -18.651 | 34.736 | 1.00 | 101.95 | ? | 3 | BMA | F | O5 | 1 |
| HETATM | 5174 | O | O6 | BMA | F | 4 | ? | 13.025  | -17.905 | 37.043 | 1.00 | 99.55  | ? | 3 | BMA | F | O6 | 1 |
| HETATM | 5175 | C | C1 | FUC | F | 4 | ? | 18.016  | -24.895 | 27.976 | 1.00 | 66.14  | ? | 4 | FUC | F | C1 | 1 |
| HETATM | 5176 | C | C2 | FUC | F | 4 | ? | 18.391  | -26.026 | 28.949 | 1.00 | 75.03  | ? | 4 | FUC | F | C2 | 1 |
| HETATM | 5177 | C | C3 | FUC | F | 4 | ? | 18.087  | -25.634 | 30.390 | 1.00 | 81.78  | ? | 4 | FUC | F | C3 | 1 |
| HETATM | 5178 | C | C4 | FUC | F | 4 | ? | 16.620  | -25.193 | 30.481 | 1.00 | 82.20  | ? | 4 | FUC | F | C4 | 1 |
| HETATM | 5179 | C | C5 | FUC | F | 4 | ? | 16.301  | -24.071 | 29.472 | 1.00 | 74.09  | ? | 4 | FUC | F | C5 | 1 |
| HETATM | 5180 | C | C6 | FUC | F | 4 | ? | 14.832  | -23.751 | 29.393 | 1.00 | 75.55  | ? | 4 | FUC | F | C6 | 1 |
| HETATM | 5181 | O | O2 | FUC | F | 4 | ? | 19.789  | -26.283 | 28.871 | 1.00 | 68.49  | ? | 4 | FUC | F | O2 | 1 |
| HETATM | 5182 | O | O3 | FUC | F | 4 | ? | 18.334  | -26.787 | 31.210 | 1.00 | 80.98  | ? | 4 | FUC | F | O3 | 1 |
| HETATM | 5183 | O | O4 | FUC | F | 4 | ? | 15.789  | -26.312 | 30.235 | 1.00 | 89.82  | ? | 4 | FUC | F | O4 | 1 |
| HETATM | 5184 | O | O5 | FUC | F | 4 | ? | 16.670  | -24.466 | 28.106 | 1.00 | 65.17  | ? | 4 | FUC | F | O5 | 1 |
| HETATM | 5185 | C | C1 | NAG | G | 5 | ? | -13.900 | 13.276  | 22.185 | 1.00 | 36.70  | ? | 1 | NAG | G | C1 | 1 |
| HETATM | 5186 | C | C2 | NAG | G | 5 | ? | -14.663 | 12.946  | 23.436 | 1.00 | 49.77  | ? | 1 | NAG | G | C2 | 1 |
| HETATM | 5187 | C | C3 | NAG | G | 5 | ? | -15.606 | 14.030  | 23.879 | 1.00 | 46.58  | ? | 1 | NAG | G | C3 | 1 |
| HETATM | 5188 | C | C4 | NAG | G | 5 | ? | -14.780 | 15.297  | 24.100 | 1.00 | 47.28  | ? | 1 | NAG | G | C4 | 1 |
| HETATM | 5189 | C | C5 | NAG | G | 5 | ? | -14.026 | 15.645  | 22.800 | 1.00 | 47.34  | ? | 1 | NAG | G | C5 | 1 |
| HETATM | 5190 | C | C6 | NAG | G | 5 | ? | -13.042 | 16.799  | 22.962 | 1.00 | 44.03  | ? | 1 | NAG | G | C6 | 1 |
| HETATM | 5191 | C | C7 | NAG | G | 5 | ? | -15.088 | 10.737  | 24.319 | 1.00 | 65.77  | ? | 1 | NAG | G | C7 | 1 |
| HETATM | 5192 | C | C8 | NAG | G | 5 | ? | -16.332 | 9.965   | 24.695 | 1.00 | 87.14  | ? | 1 | NAG | G | C8 | 1 |
| HETATM | 5193 | N | N2 | NAG | G | 5 | ? | -15.319 | 11.648  | 23.377 | 1.00 | 64.56  | ? | 1 | NAG | G | N2 | 1 |
| HETATM | 5194 | O | O3 | NAG | G | 5 | ? | -16.170 | 13.616  | 25.149 | 1.00 | 53.92  | ? | 1 | NAG | G | O3 | 1 |
| HETATM | 5195 | O | O4 | NAG | G | 5 | ? | -15.608 | 16.387  | 24.448 | 1.00 | 32.21  | ? | 1 | NAG | G | O4 | 1 |
| HETATM | 5196 | O | O5 | NAG | G | 5 | ? | -13.268 | 14.522  | 22.323 | 1.00 | 41.57  | ? | 1 | NAG | G | O5 | 1 |
| HETATM | 5197 | O | O6 | NAG | G | 5 | ? | -12.143 | 16.581  | 24.056 | 1.00 | 40.14  | ? | 1 | NAG | G | O6 | 1 |
| HETATM | 5198 | O | O7 | NAG | G | 5 | ? | -14.003 | 10.517  | 24.850 | 1.00 | 58.28  | ? | 1 | NAG | G | O7 | 1 |
| HETATM | 5199 | C | C1 | NAG | G | 5 | ? | -15.295 | 17.230  | 25.505 | 1.00 | 33.64  | ? | 2 | NAG | G | C1 | 1 |
| HETATM | 5200 | C | C2 | NAG | G | 5 | ? | -16.412 | 18.217  | 25.730 | 1.00 | 33.61  | ? | 2 | NAG | G | C2 | 1 |
| HETATM | 5201 | C | C3 | NAG | G | 5 | ? | -16.141 | 19.057  | 26.949 | 1.00 | 29.99  | ? | 2 | NAG | G | C3 | 1 |
| HETATM | 5202 | C | C4 | NAG | G | 5 | ? | -15.883 | 18.211  | 28.154 | 1.00 | 24.21  | ? | 2 | NAG | G | C4 | 1 |
| HETATM | 5203 | C | C5 | NAG | G | 5 | ? | -14.802 | 17.183  | 27.852 | 1.00 | 33.88  | ? | 2 | NAG | G | C5 | 1 |
| HETATM | 5204 | C | C6 | NAG | G | 5 | ? | -14.480 | 16.209  | 28.968 | 1.00 | 38.02  | ? | 2 | NAG | G | C6 | 1 |
| HETATM | 5205 | C | C7 | NAG | G | 5 | ? | -16.994 | 18.707  | 23.414 | 1.00 | 62.96  | ? | 2 | NAG | G | C7 | 1 |
| HETATM | 5206 | C | C8 | NAG | G | 5 | ? | -17.550 | 19.840  | 22.579 | 1.00 | 70.93  | ? | 2 | NAG | G | C8 | 1 |
| HETATM | 5207 | N | N2 | NAG | G | 5 | ? | -16.524 | 19.118  | 24.584 | 1.00 | 40.34  | ? | 2 | NAG | G | N2 | 1 |
| HETATM | 5208 | O | O3 | NAG | G | 5 | ? | -17.235 | 19.962  | 27.174 | 1.00 | 33.43  | ? | 2 | NAG | G | O3 | 1 |
| HETATM | 5209 | O | O4 | NAG | G | 5 | ? | -15.514 | 19.002  | 29.276 | 1.00 | 29.85  | ? | 2 | NAG | G | O4 | 1 |
| HETATM | 5210 | O | O5 | NAG | G | 5 | ? | -15.070 | 16.451  | 26.649 | 1.00 | 33.97  | ? | 2 | NAG | G | O5 | 1 |

|        |      |   |    |     |   |   |   |         |        |        |      |        |   |   |     |   |    |   |
|--------|------|---|----|-----|---|---|---|---------|--------|--------|------|--------|---|---|-----|---|----|---|
| HETATM | 5211 | O | O6 | NAG | G | 5 | ? | -13.118 | 15.749 | 28.826 | 1.00 | 64.06  | ? | 2 | NAG | G | O6 | 1 |
| HETATM | 5212 | O | O7 | NAG | G | 5 | ? | -16.990 | 17.544 | 23.020 | 1.00 | 80.38  | ? | 2 | NAG | G | O7 | 1 |
| HETATM | 5213 | C | C1 | BMA | G | 5 | ? | -16.074 | 18.667 | 30.514 | 1.00 | 31.63  | ? | 3 | BMA | G | C1 | 1 |
| HETATM | 5214 | C | C2 | BMA | G | 5 | ? | -15.133 | 18.955 | 31.638 | 1.00 | 27.34  | ? | 3 | BMA | G | C2 | 1 |
| HETATM | 5215 | C | C3 | BMA | G | 5 | ? | -15.788 | 18.591 | 32.973 | 1.00 | 39.35  | ? | 3 | BMA | G | C3 | 1 |
| HETATM | 5216 | C | C4 | BMA | G | 5 | ? | -17.120 | 19.322 | 33.095 | 1.00 | 39.33  | ? | 3 | BMA | G | C4 | 1 |
| HETATM | 5217 | C | C5 | BMA | G | 5 | ? | -18.000 | 19.123 | 31.894 | 1.00 | 42.73  | ? | 3 | BMA | G | C5 | 1 |
| HETATM | 5218 | C | C6 | BMA | G | 5 | ? | -19.236 | 20.029 | 31.974 | 1.00 | 56.20  | ? | 3 | BMA | G | C6 | 1 |
| HETATM | 5219 | O | O2 | BMA | G | 5 | ? | -14.706 | 20.342 | 31.653 | 1.00 | 33.11  | ? | 3 | BMA | G | O2 | 1 |
| HETATM | 5220 | O | O3 | BMA | G | 5 | ? | -14.979 | 19.159 | 34.045 | 1.00 | 37.28  | ? | 3 | BMA | G | O3 | 1 |
| HETATM | 5221 | O | O4 | BMA | G | 5 | ? | -17.786 | 18.900 | 34.277 | 1.00 | 36.16  | ? | 3 | BMA | G | O4 | 1 |
| HETATM | 5222 | O | O5 | BMA | G | 5 | ? | -17.320 | 19.358 | 30.648 | 1.00 | 35.83  | ? | 3 | BMA | G | O5 | 1 |
| HETATM | 5223 | O | O6 | BMA | G | 5 | ? | -20.225 | 19.889 | 30.948 | 1.00 | 89.67  | ? | 3 | BMA | G | O6 | 1 |
| HETATM | 5224 | C | C1 | MAN | G | 5 | ? | -14.582 | 18.227 | 35.020 | 1.00 | 34.71  | ? | 4 | MAN | G | C1 | 1 |
| HETATM | 5225 | C | C2 | MAN | G | 5 | ? | -14.044 | 18.946 | 36.239 | 1.00 | 30.57  | ? | 4 | MAN | G | C2 | 1 |
| HETATM | 5226 | C | C3 | MAN | G | 5 | ? | -12.989 | 19.926 | 35.693 | 1.00 | 38.15  | ? | 4 | MAN | G | C3 | 1 |
| HETATM | 5227 | C | C4 | MAN | G | 5 | ? | -11.864 | 19.143 | 35.024 | 1.00 | 40.70  | ? | 4 | MAN | G | C4 | 1 |
| HETATM | 5228 | C | C5 | MAN | G | 5 | ? | -12.414 | 18.193 | 33.968 | 1.00 | 37.86  | ? | 4 | MAN | G | C5 | 1 |
| HETATM | 5229 | C | C6 | MAN | G | 5 | ? | -11.308 | 17.232 | 33.476 | 1.00 | 40.28  | ? | 4 | MAN | G | C6 | 1 |
| HETATM | 5230 | O | O2 | MAN | G | 5 | ? | -13.495 | 17.899 | 37.111 | 1.00 | 29.24  | ? | 4 | MAN | G | O2 | 1 |
| HETATM | 5231 | O | O3 | MAN | G | 5 | ? | -12.451 | 20.740 | 36.748 | 1.00 | 34.14  | ? | 4 | MAN | G | O3 | 1 |
| HETATM | 5232 | O | O4 | MAN | G | 5 | ? | -10.959 | 19.998 | 34.331 | 1.00 | 27.31  | ? | 4 | MAN | G | O4 | 1 |
| HETATM | 5233 | O | O5 | MAN | G | 5 | ? | -13.502 | 17.408 | 34.513 | 1.00 | 30.22  | ? | 4 | MAN | G | O5 | 1 |
| HETATM | 5234 | O | O6 | MAN | G | 5 | ? | -11.830 | 16.068 | 32.789 | 1.00 | 44.16  | ? | 4 | MAN | G | O6 | 1 |
| HETATM | 5235 | C | C1 | MAN | G | 5 | ? | -20.331 | 20.912 | 29.984 | 1.00 | 115.47 | ? | 5 | MAN | G | C1 | 1 |
| HETATM | 5236 | C | C2 | MAN | G | 5 | ? | -20.866 | 22.174 | 30.641 | 1.00 | 123.89 | ? | 5 | MAN | G | C2 | 1 |
| HETATM | 5237 | C | C3 | MAN | G | 5 | ? | -22.040 | 21.692 | 31.470 | 1.00 | 128.01 | ? | 5 | MAN | G | C3 | 1 |
| HETATM | 5238 | C | C4 | MAN | G | 5 | ? | -23.073 | 20.912 | 30.692 | 1.00 | 130.39 | ? | 5 | MAN | G | C4 | 1 |
| HETATM | 5239 | C | C5 | MAN | G | 5 | ? | -22.480 | 19.922 | 29.723 | 1.00 | 127.13 | ? | 5 | MAN | G | C5 | 1 |
| HETATM | 5240 | C | C6 | MAN | G | 5 | ? | -23.452 | 19.277 | 28.732 | 1.00 | 123.05 | ? | 5 | MAN | G | C6 | 1 |
| HETATM | 5241 | O | O2 | MAN | G | 5 | ? | -21.022 | 23.223 | 29.652 | 1.00 | 135.93 | ? | 5 | MAN | G | O2 | 1 |
| HETATM | 5242 | O | O3 | MAN | G | 5 | ? | -22.585 | 22.686 | 32.333 | 1.00 | 124.59 | ? | 5 | MAN | G | O3 | 1 |
| HETATM | 5243 | O | O4 | MAN | G | 5 | ? | -23.939 | 20.197 | 31.572 | 1.00 | 137.56 | ? | 5 | MAN | G | O4 | 1 |
| HETATM | 5244 | O | O5 | MAN | G | 5 | ? | -21.347 | 20.483 | 29.023 | 1.00 | 125.42 | ? | 5 | MAN | G | O5 | 1 |
| HETATM | 5245 | O | O6 | MAN | G | 5 | ? | -22.907 | 18.874 | 27.455 | 1.00 | 105.59 | ? | 5 | MAN | G | O6 | 1 |
| HETATM | 5246 | C | C1 | FUC | G | 5 | ? | -17.464 | 13.018 | 25.220 | 1.00 | 54.35  | ? | 6 | FUC | G | C1 | 1 |
| HETATM | 5247 | C | C2 | FUC | G | 5 | ? | -17.792 | 12.498 | 26.647 | 1.00 | 57.72  | ? | 6 | FUC | G | C2 | 1 |
| HETATM | 5248 | C | C3 | FUC | G | 5 | ? | -17.742 | 13.637 | 27.649 | 1.00 | 64.98  | ? | 6 | FUC | G | C3 | 1 |
| HETATM | 5249 | C | C4 | FUC | G | 5 | ? | -18.766 | 14.703 | 27.199 | 1.00 | 65.03  | ? | 6 | FUC | G | C4 | 1 |
| HETATM | 5250 | C | C5 | FUC | G | 5 | ? | -18.490 | 15.115 | 25.744 | 1.00 | 60.69  | ? | 6 | FUC | G | C5 | 1 |
| HETATM | 5251 | C | C6 | FUC | G | 5 | ? | -19.491 | 16.053 | 25.149 | 1.00 | 80.94  | ? | 6 | FUC | G | C6 | 1 |
| HETATM | 5252 | O | O2 | FUC | G | 5 | ? | -16.849 | 11.494 | 26.982 | 1.00 | 50.50  | ? | 6 | FUC | G | O2 | 1 |
| HETATM | 5253 | O | O3 | FUC | G | 5 | ? | -18.078 | 13.200 | 28.971 | 1.00 | 54.76  | ? | 6 | FUC | G | O3 | 1 |
| HETATM | 5254 | O | O4 | FUC | G | 5 | ? | -20.055 | 14.118 | 27.295 | 1.00 | 81.13  | ? | 6 | FUC | G | O4 | 1 |
| HETATM | 5255 | O | O5 | FUC | G | 5 | ? | -18.477 | 13.953 | 24.851 | 1.00 | 53.54  | ? | 6 | FUC | G | O5 | 1 |
| HETATM | 5256 | C | C1 | NAG | H | 4 | ? | 15.231  | 53.524 | 28.709 | 1.00 | 32.98  | ? | 1 | NAG | H | C1 | 1 |
| HETATM | 5257 | C | C2 | NAG | H | 4 | ? | 16.081  | 54.651 | 29.212 | 1.00 | 46.15  | ? | 1 | NAG | H | C2 | 1 |
| HETATM | 5258 | C | C3 | NAG | H | 4 | ? | 17.445  | 54.135 | 29.615 | 1.00 | 54.21  | ? | 1 | NAG | H | C3 | 1 |
| HETATM | 5259 | C | C4 | NAG | H | 4 | ? | 17.346  | 52.965 | 30.565 | 1.00 | 54.63  | ? | 1 | NAG | H | C4 | 1 |
| HETATM | 5260 | C | C5 | NAG | H | 4 | ? | 16.463  | 51.859 | 29.959 | 1.00 | 42.67  | ? | 1 | NAG | H | C5 | 1 |
| HETATM | 5261 | C | C6 | NAG | H | 4 | ? | 16.115  | 50.722 | 30.907 | 1.00 | 33.70  | ? | 1 | NAG | H | C6 | 1 |
| HETATM | 5262 | C | C7 | NAG | H | 4 | ? | 15.766  | 56.820 | 28.185 | 1.00 | 65.39  | ? | 1 | NAG | H | C7 | 1 |
| HETATM | 5263 | C | C8 | NAG | H | 4 | ? | 16.043  | 57.665 | 26.964 | 1.00 | 55.43  | ? | 1 | NAG | H | C8 | 1 |
| HETATM | 5264 | N | N2 | NAG | H | 4 | ? | 16.318  | 55.612 | 28.115 | 1.00 | 56.22  | ? | 1 | NAG | H | N2 | 1 |
| HETATM | 5265 | O | O3 | NAG | H | 4 | ? | 18.200  | 55.208 | 30.239 | 1.00 | 65.63  | ? | 1 | NAG | H | O3 | 1 |
| HETATM | 5266 | O | O4 | NAG | H | 4 | ? | 18.640  | 52.459 | 30.857 | 1.00 | 62.00  | ? | 1 | NAG | H | O4 | 1 |
| HETATM | 5267 | O | O5 | NAG | H | 4 | ? | 15.186  | 52.436 | 29.589 | 1.00 | 39.48  | ? | 1 | NAG | H | O5 | 1 |
| HETATM | 5268 | O | O6 | NAG | H | 4 | ? | 15.077  | 51.123 | 31.814 | 1.00 | 43.49  | ? | 1 | NAG | H | O6 | 1 |
| HETATM | 5269 | O | O7 | NAG | H | 4 | ? | 15.093  | 57.226 | 29.130 | 1.00 | 66.70  | ? | 1 | NAG | H | O7 | 1 |



|        |      |   |    |   |     |   |   |   |   |        |        |        |      |        |   |   |     |   |    |   |
|--------|------|---|----|---|-----|---|---|---|---|--------|--------|--------|------|--------|---|---|-----|---|----|---|
| HETATM | 5270 | C | C1 | . | NAG | H | 4 | . | ? | 19.037 | 52.162 | 32.156 | 1.00 | 76.62  | ? | 2 | NAG | H | C1 | 1 |
| HETATM | 5271 | C | C2 | . | NAG | H | 4 | . | ? | 20.525 | 51.977 | 32.184 | 1.00 | 85.78  | ? | 2 | NAG | H | C2 | 1 |
| HETATM | 5272 | C | C3 | . | NAG | H | 4 | . | ? | 21.106 | 51.954 | 33.573 | 1.00 | 101.90 | ? | 2 | NAG | H | C3 | 1 |
| HETATM | 5273 | C | C4 | . | NAG | H | 4 | . | ? | 20.605 | 53.113 | 34.402 | 1.00 | 110.98 | ? | 2 | NAG | H | C4 | 1 |
| HETATM | 5274 | C | C5 | . | NAG | H | 4 | . | ? | 19.065 | 53.062 | 34.400 | 1.00 | 100.71 | ? | 2 | NAG | H | C5 | 1 |
| HETATM | 5275 | C | C6 | . | NAG | H | 4 | . | ? | 18.401 | 54.188 | 35.178 | 1.00 | 103.95 | ? | 2 | NAG | H | C6 | 1 |
| HETATM | 5276 | C | C7 | . | NAG | H | 4 | . | ? | 20.521 | 50.341 | 30.335 | 1.00 | 72.00  | ? | 2 | NAG | H | C7 | 1 |
| HETATM | 5277 | C | C8 | . | NAG | H | 4 | . | ? | 20.672 | 51.386 | 29.258 | 1.00 | 88.76  | ? | 2 | NAG | H | C8 | 1 |
| HETATM | 5278 | N | N2 | . | NAG | H | 4 | . | ? | 20.869 | 50.704 | 31.553 | 1.00 | 79.69  | ? | 2 | NAG | H | N2 | 1 |
| HETATM | 5279 | O | O3 | . | NAG | H | 4 | . | ? | 22.542 | 52.004 | 33.450 | 1.00 | 127.35 | ? | 2 | NAG | H | O3 | 1 |
| HETATM | 5280 | O | O4 | . | NAG | H | 4 | . | ? | 21.060 | 53.035 | 35.744 | 1.00 | 125.41 | ? | 2 | NAG | H | O4 | 1 |
| HETATM | 5281 | O | O5 | . | NAG | H | 4 | . | ? | 18.596 | 53.143 | 33.041 | 1.00 | 87.62  | ? | 2 | NAG | H | O5 | 1 |
| HETATM | 5282 | O | O6 | . | NAG | H | 4 | . | ? | 17.010 | 53.860 | 35.371 | 1.00 | 122.67 | ? | 2 | NAG | H | O6 | 1 |
| HETATM | 5283 | O | O7 | . | NAG | H | 4 | . | ? | 20.112 | 49.210 | 30.080 | 1.00 | 62.68  | ? | 2 | NAG | H | O7 | 1 |
| HETATM | 5284 | C | C1 | . | BMA | H | 4 | . | ? | 22.246 | 53.639 | 36.148 | 1.00 | 136.26 | ? | 3 | BMA | H | C1 | 1 |
| HETATM | 5285 | C | C2 | . | BMA | H | 4 | . | ? | 23.066 | 52.621 | 36.921 | 1.00 | 142.24 | ? | 3 | BMA | H | C2 | 1 |
| HETATM | 5286 | C | C3 | . | BMA | H | 4 | . | ? | 22.318 | 52.451 | 38.242 | 1.00 | 147.60 | ? | 3 | BMA | H | C3 | 1 |
| HETATM | 5287 | C | C4 | . | BMA | H | 4 | . | ? | 22.509 | 53.674 | 39.117 | 1.00 | 147.23 | ? | 3 | BMA | H | C4 | 1 |
| HETATM | 5288 | C | C5 | . | BMA | H | 4 | . | ? | 22.624 | 54.900 | 38.238 | 1.00 | 144.03 | ? | 3 | BMA | H | C5 | 1 |
| HETATM | 5289 | C | C6 | . | BMA | H | 4 | . | ? | 24.038 | 55.533 | 38.121 | 1.00 | 144.35 | ? | 3 | BMA | H | C6 | 1 |
| HETATM | 5290 | O | O2 | . | BMA | H | 4 | . | ? | 24.462 | 53.047 | 36.956 | 1.00 | 134.70 | ? | 3 | BMA | H | O2 | 1 |
| HETATM | 5291 | O | O3 | . | BMA | H | 4 | . | ? | 22.584 | 51.226 | 38.918 | 1.00 | 153.42 | ? | 3 | BMA | H | O3 | 1 |
| HETATM | 5292 | O | O4 | . | BMA | H | 4 | . | ? | 21.366 | 53.871 | 40.008 | 1.00 | 148.18 | ? | 3 | BMA | H | O4 | 1 |
| HETATM | 5293 | O | O5 | . | BMA | H | 4 | . | ? | 21.917 | 54.767 | 36.989 | 1.00 | 139.91 | ? | 3 | BMA | H | O5 | 1 |
| HETATM | 5294 | O | O6 | . | BMA | H | 4 | . | ? | 24.761 | 55.511 | 39.424 | 1.00 | 138.93 | ? | 3 | BMA | H | O6 | 1 |
| HETATM | 5295 | C | C1 | A | FUC | H | 4 | . | ? | 19.608 | 55.038 | 30.371 | 0.73 | 75.86  | ? | 4 | FUC | H | C1 | 1 |
| HETATM | 5296 | C | C1 | B | FUC | H | 4 | . | ? | 17.854 | 55.552 | 31.568 | 0.27 | 69.15  | ? | 4 | FUC | H | C1 | 1 |
| HETATM | 5297 | C | C2 | A | FUC | H | 4 | . | ? | 20.453 | 55.853 | 29.374 | 0.73 | 80.15  | ? | 4 | FUC | H | C2 | 1 |
| HETATM | 5298 | C | C2 | B | FUC | H | 4 | . | ? | 18.459 | 56.850 | 32.152 | 0.27 | 74.61  | ? | 4 | FUC | H | C2 | 1 |
| HETATM | 5299 | C | C3 | A | FUC | H | 4 | . | ? | 20.328 | 57.346 | 29.643 | 0.73 | 81.58  | ? | 4 | FUC | H | C3 | 1 |
| HETATM | 5300 | C | C3 | B | FUC | H | 4 | . | ? | 17.512 | 58.003 | 32.379 | 0.27 | 73.01  | ? | 4 | FUC | H | C3 | 1 |
| HETATM | 5301 | C | C4 | A | FUC | H | 4 | . | ? | 20.864 | 57.558 | 31.075 | 0.73 | 83.11  | ? | 4 | FUC | H | C4 | 1 |
| HETATM | 5302 | C | C4 | B | FUC | H | 4 | . | ? | 16.202 | 57.483 | 32.993 | 0.27 | 68.53  | ? | 4 | FUC | H | C4 | 1 |
| HETATM | 5303 | C | C5 | A | FUC | H | 4 | . | ? | 20.049 | 56.702 | 32.073 | 0.73 | 78.94  | ? | 4 | FUC | H | C5 | 1 |
| HETATM | 5304 | C | C5 | B | FUC | H | 4 | . | ? | 15.604 | 56.414 | 32.054 | 0.27 | 65.73  | ? | 4 | FUC | H | C5 | 1 |
| HETATM | 5305 | C | C6 | A | FUC | H | 4 | . | ? | 20.612 | 56.725 | 33.464 | 0.73 | 71.65  | ? | 4 | FUC | H | C6 | 1 |
| HETATM | 5306 | C | C6 | B | FUC | H | 4 | . | ? | 14.316 | 55.827 | 32.552 | 0.27 | 45.47  | ? | 4 | FUC | H | C6 | 1 |
| HETATM | 5307 | O | O2 | A | FUC | H | 4 | . | ? | 20.073 | 55.579 | 28.043 | 0.73 | 103.13 | ? | 4 | FUC | H | O2 | 1 |
| HETATM | 5308 | O | O2 | B | FUC | H | 4 | . | ? | 19.513 | 57.294 | 31.306 | 0.27 | 79.01  | ? | 4 | FUC | H | O2 | 1 |
| HETATM | 5309 | O | O3 | A | FUC | H | 4 | . | ? | 21.100 | 58.085 | 28.683 | 0.73 | 54.89  | ? | 4 | FUC | H | O3 | 1 |
| HETATM | 5310 | O | O3 | B | FUC | H | 4 | . | ? | 18.135 | 58.945 | 33.265 | 0.27 | 82.48  | ? | 4 | FUC | H | O3 | 1 |
| HETATM | 5311 | O | O4 | A | FUC | H | 4 | . | ? | 22.204 | 57.082 | 31.089 | 0.73 | 105.44 | ? | 4 | FUC | H | O4 | 1 |
| HETATM | 5312 | O | O4 | B | FUC | H | 4 | . | ? | 16.511 | 56.873 | 34.237 | 0.27 | 72.74  | ? | 4 | FUC | H | O4 | 1 |
| HETATM | 5313 | O | O5 | A | FUC | H | 4 | . | ? | 20.053 | 55.283 | 31.699 | 0.73 | 79.70  | ? | 4 | FUC | H | O5 | 1 |
| HETATM | 5314 | O | O5 | B | FUC | H | 4 | . | ? | 16.523 | 55.284 | 31.929 | 0.27 | 66.98  | ? | 4 | FUC | H | O5 | 1 |

...  
#

...  
#

\_database\_PDB\_caveat.id 1

\_database\_PDB\_caveat.text 'BMA H 3 HAS WRONG CHIRALITY AT ATOM C1'

#
